# Supplementary material for: Risks to human and animal health related to the presence of deoxynivalenol and its acetylated and modified forms in food and feed
Source: PubMed Central journal article supplement (PMC7010102; doi:10.2903/j.efsa.2017.4718), 2017-09-11
Supplement: EFS2-15-e04718-s001.pdf [file EFS2-15-e04718-s001.pdf]

Annex to:

EFSA CONTAM Panel (EFSA Panel on Contaminants in the Food Chain), Alexander J, Barregård L, Bignami M, Brüschweiler B, Ceccatelli S, Cottrill B, Dinovi M, Grasl-Kraupp B, Hogstrand C, Hoogenboom LR, Knutsen HK, Nebbia CS, Oswald IP, Petersen A, Rose M, Roudot A-C, Schwerdtle T, Vleminckx C, Vollmer G, Wallace H, De Saeger S, Sundstøl Eriksen G, Farmer P, Fremy J-M, Gong YY, Meyer K, Naegeli H, Parent-Massin D, Rietjens I, van Egmond H, Altieri A, Eskola M, Gergelova P, Ramos Bordajandi L, Benkova B, Dörr B, Gkrillas A, Gustavsson N, van Manen M and Edler L, 2017. Scientific opinion on the risks to human and animal health related to the presence of deoxynivalenol and its acetylated and modified forms in food and feed. *EFSA Journal* 2017;15(9):4718, 345 pp. doi:10.2903/j.efsa.2017.4718

© 2017 European Food Safety Authority. *EFSA Journal* published by John Wiley and Sons Ltd on behalf of European Food Safety Authority.

## Annex A – Supplementary information for the BMD calculations

### Supplementary information IVERSONBW (Iverson et al., 1995)

Details of the BMD Analysis of the body weight data of Iverson et al. (1995) reported in Appendix G, Section G.2.1 of the Scientific Opinion on the risks to human and animal health related to the presence of deoxynivalenol and its acetylated and modified forms in food and feed

Filename: IVERSONBW Folder IVERSON-1995-mice

Output from PROAST 62.6 from 13 OCT 2016

BMD analysis of body weight data of females (f: black curve) and males (m: red curve) combined

Graphical output

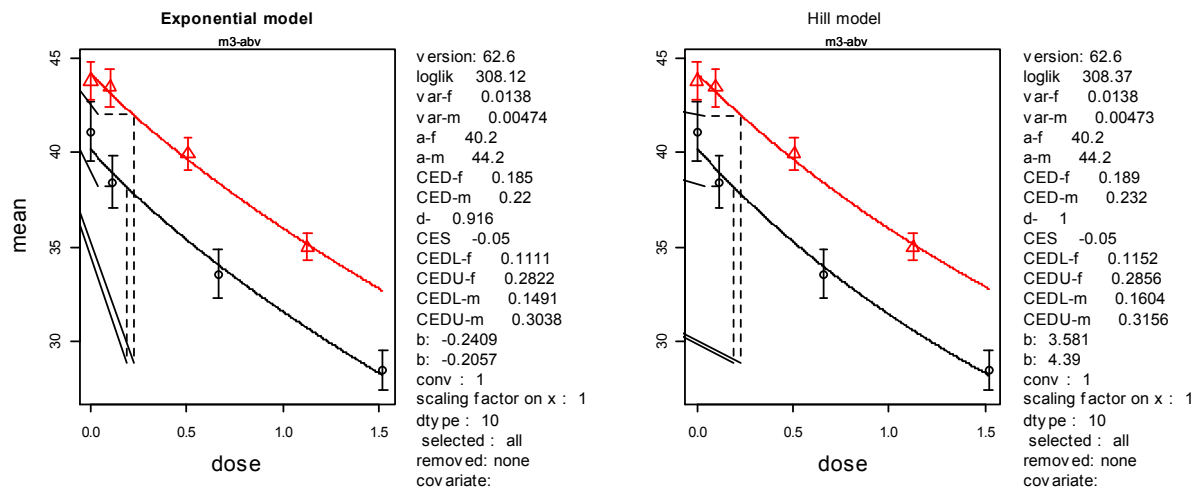

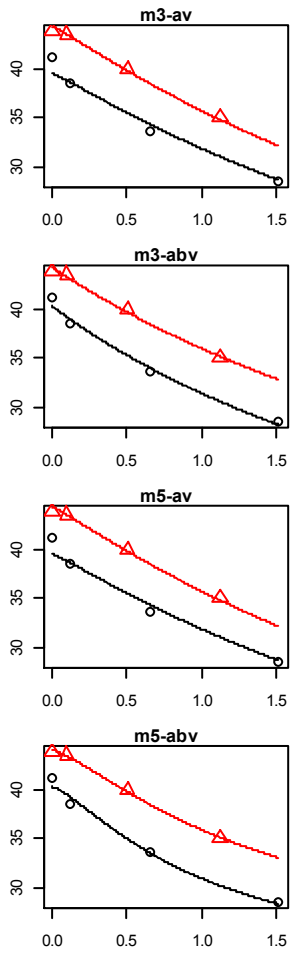

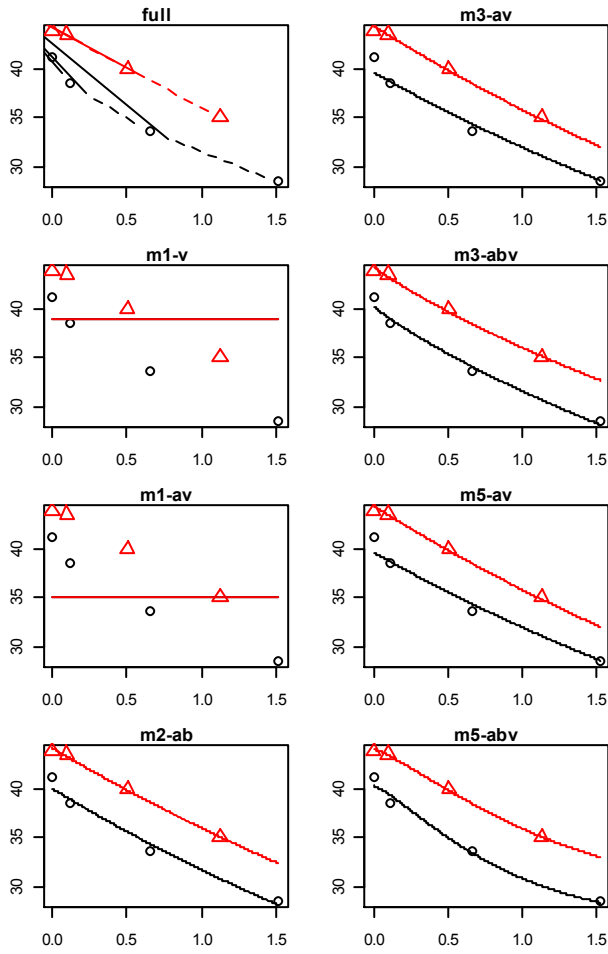

Graphic of the BMD- 90% confidence interval (C.I.) for female and male and for exponential and Hill models

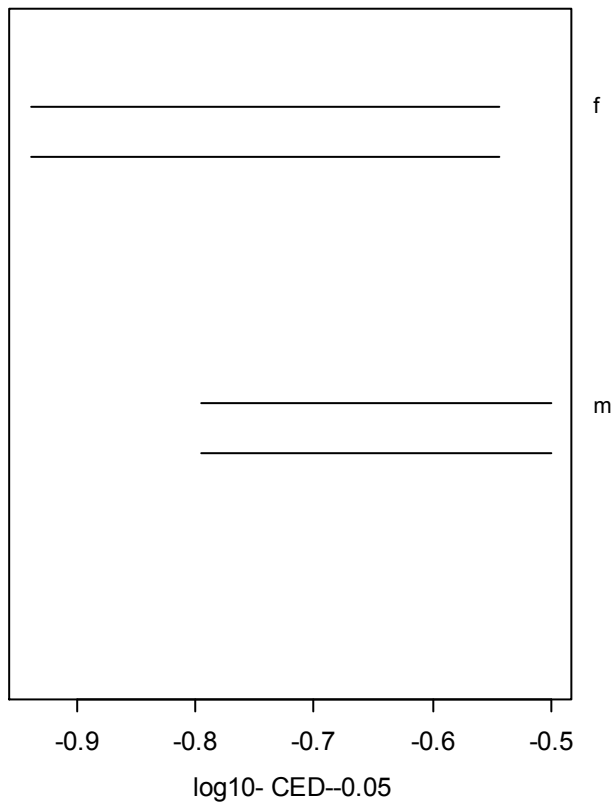

Numerical output

Response: mean

| <b>ANALYSIS WITH EXPONENTIAL MODELS</b> |                  |                             |                       |            |
|-----------------------------------------|------------------|-----------------------------|-----------------------|------------|
| <b>Model</b>                            | <b>Converged</b> | <b>Number of parameters</b> | <b>Log-likelihood</b> | <b>AIC</b> |
| full                                    | 1                | 9                           | 289.36                | -560.72    |
| full-v                                  | 1                | 10                          | 310.36                | -600.72    |
| m1-v                                    | 1                | 3                           | 135.59                | -265.18    |
| m1-av                                   | 1                | 4                           | 162.95                | -317.9     |
| m2-ab                                   | 1                | 5                           | 285.98                | -561.96    |
| m3-av                                   | 1                | 6                           | 306.94                | -601.88    |
| m3-abv                                  | 1                | 7                           | 308.12                | -602.24    |
| m5-av                                   | 1                | 7                           | 306.94                | -599.88    |
| m5-abv                                  | 1                | 8                           | 308.95                | -601.9     |

AIC: Akaike's Information Criterion.

Best model with covariates is: m3-abv.

However, m5-abv is a reasonable model as well, and so is m3-av.

Selected model: m3-abv

The CED – Critical Effect Dose (in original units) and the 90 % C.I. for group f is:

0.18484

0.1111

0.28222

The CED (in original units) and the 90 % C.I. for group m is:  
 0.21964  
 0.14911  
 0.30377

Response: mean

| <b>ANALYSIS WITH HILL MODELS</b> |                  |                             |                       |            |
|----------------------------------|------------------|-----------------------------|-----------------------|------------|
| <b>Model</b>                     | <b>Converged</b> | <b>Number of parameters</b> | <b>Log-likelihood</b> | <b>AIC</b> |
| m3-av                            | 1                | 6                           | 306.86                | -601.72    |
| m3-abv                           | 1                | 7                           | 308.37                | -602.74    |
| m5-av                            | 1                | 7                           | 306.86                | -599.72    |
| m5-abv                           | 1                | 8                           | 308.82                | -601.64    |

AIC: Akaike's Information Criterion.

Best model with covariates is: m3-abv.  
 However, m3-av is a reasonable model as well, and so is m5-abv.

Selected model: m3-abv

The CED (in original units) and the 90 % C.I. for group f is:  
 0.18929  
 0.11516  
 0.28557

The CED (in original units) and the 90 % C.I. for group m is:  
 0.23205  
 0.16044  
 0.31558

| <b>covar</b> | <b>LB</b> | <b>UB</b> | <b>LB.H</b> | <b>UB.H</b> |
|--------------|-----------|-----------|-------------|-------------|
| 1 f          | 0.11516   | 0.28557   | 0.11516     | 0.28557     |
| 2 m          | 0.16044   | 0.31558   | 0.16044     | 0.31558     |

f: female; m: male; LB: lower bound; UB: upper bound;

Model with the curve (black for females) showing the smallest BMDL of 0.1111

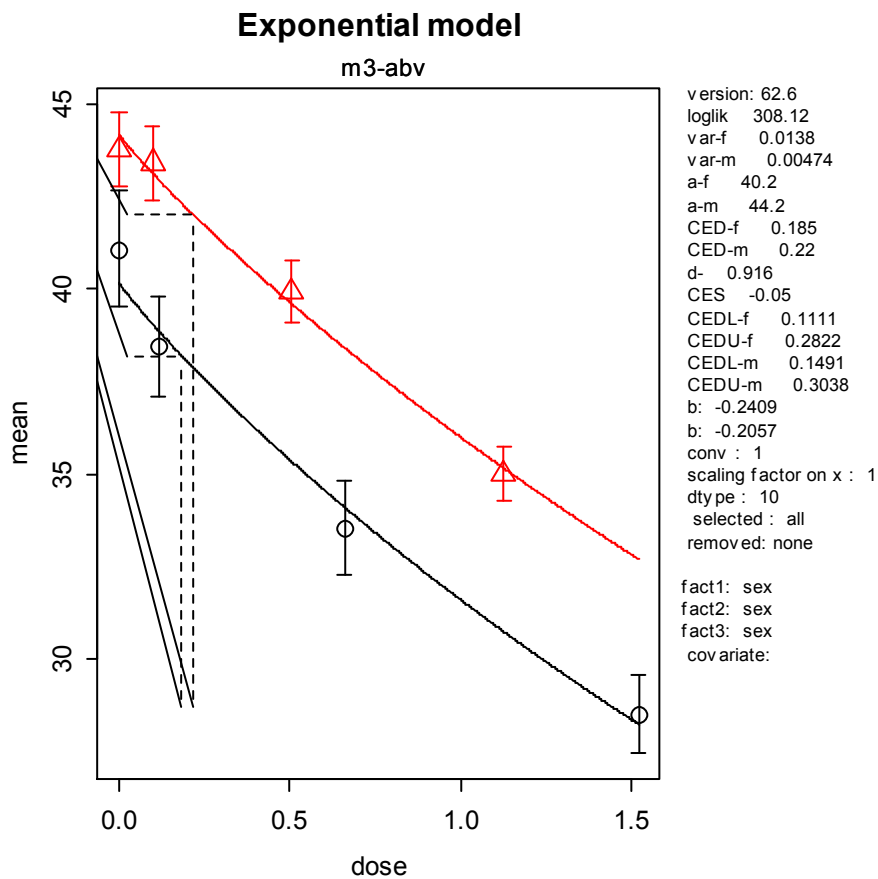

BMD analysis of the pooled data of females and males with smallest BMDL of 0.1912

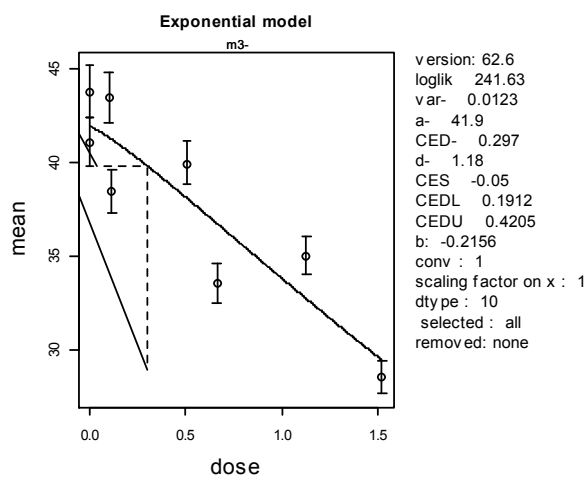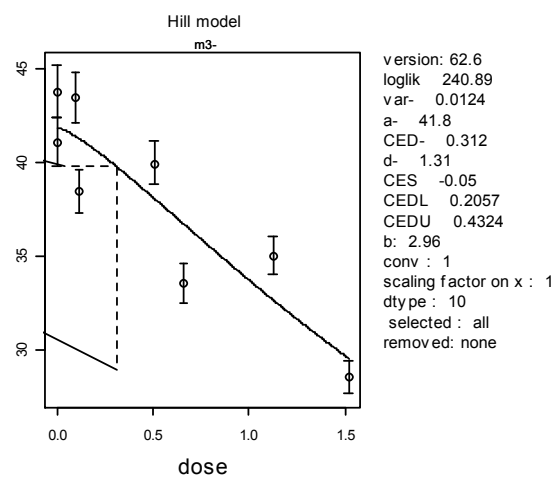

File of Iverson data: IVERSONBW

```
5
0      0      10      0      0
dose  n      mean  sd     sex
0     37     43.85  2.69  m
0.098 35     43.51  2.86  m
0.506 43     40.03  3.00  m
1.126 42     35.09  2.56  m
0     36     41.54  6.26  f
0.115 42     38.71  4.73  f
0.661 37     33.76  3.92  f
1.520 38     28.55  2.08  f
```

**Supplementary information IVERSONFDC (Iverson et al., 1995):**

Details of the BMD Analysis of the feed intake data of Iverson et al. (1995) reported in Appendix G, Section G.2.1 of the Scientific Opinion on the risks to human and animal health related to the presence of deoxynivalenol and its acetylated and modified forms in food and feed

Filename: IVERSONFDC Folder IVERSON-1995-mice

Output from PROAST 62.6 from 13 OCT 2016

BMD analysis of feed intake data of females (f: black curve) and males (m: red curve) combined

Graphical output

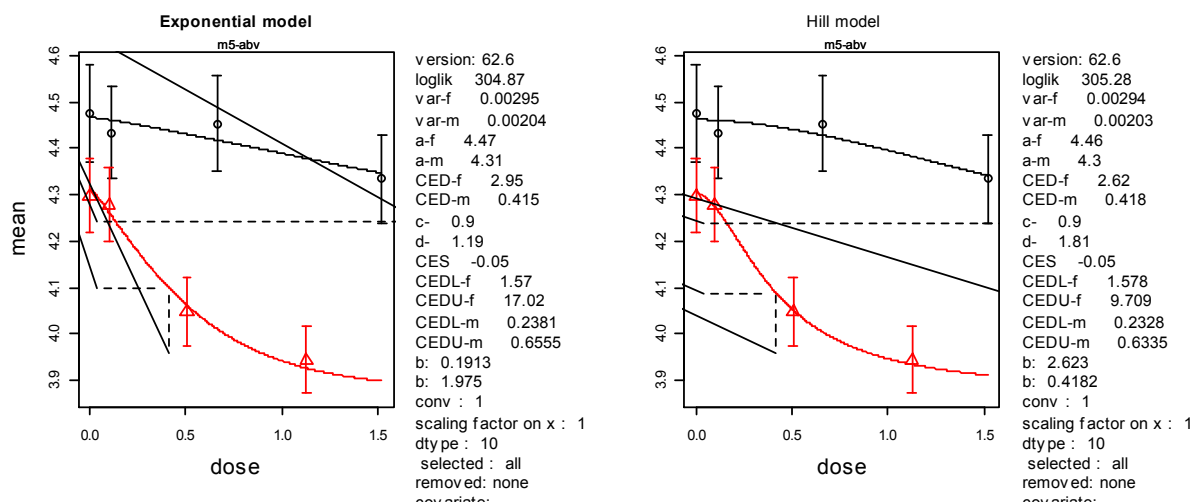



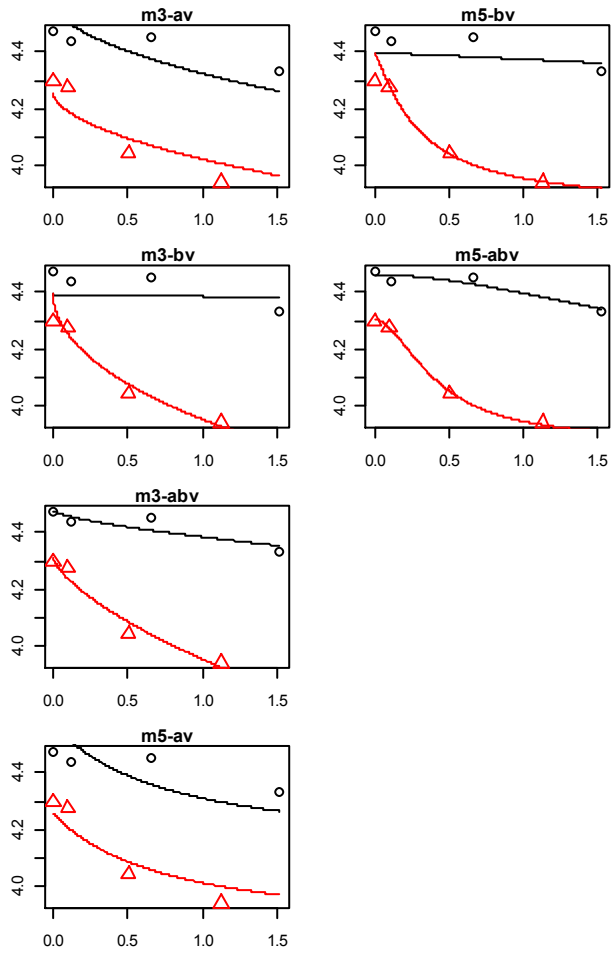

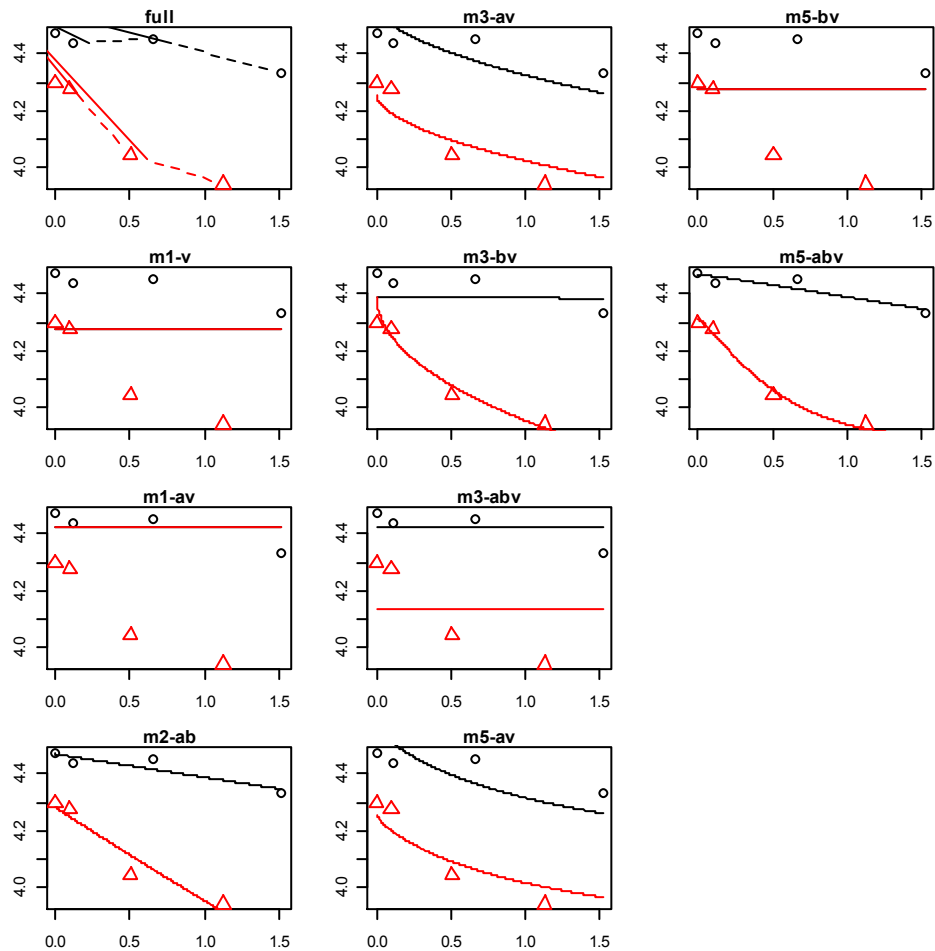

Numerical output

Response: mean

| ANALYSIS WITH EXPONENTIAL MODELS |           |                      |                |         |
|----------------------------------|-----------|----------------------|----------------|---------|
| Model                            | Converged | Number of parameters | Log-likelihood | AIC     |
| full                             | 1         | 9                    | 304.03         | -590.06 |
| full-v                           | 1         | 10                   | 305.63         | -591.26 |
| m1-v                             | 1         | 3                    | 249.86         | -493.72 |
| m1-av                            | 1         | 4                    | 278.41         | -548.82 |
| m2-ab                            | 1         | 5                    | 301.65         | -593.3  |
| m3-av                            | 1         | 6                    | 295.5          | -579    |
| m3-bv                            | 1         | 6                    | 299.27         | -586.54 |
| m3-abv                           | 1         | 7                    | 278.41         | -542.82 |
| m5-av                            | 1         | 7                    | 295.96         | -577.92 |
| m5-bv                            | 1         | 7                    | 249.86         | -485.72 |
| m5-abv                           | 1         | 8                    | 304.87         | -593.74 |

AIC: Akaike's Information Criterion.

Best model with covariates is: m5-abv.  
However, m2-ab is a reasonable model as well.

Selected model: m5-abv

The CED (in original units) and the 90 % C.I. for group f is:  
 2.9472  
 1.5698  
 17.023

The CED (in orig. units) and the 90 % C.I. for group m is:  
 0.41508  
 0.23807  
 0.65547

Response: mean

| <b>ANALYSIS WITH HILL MODELS</b> |                  |                             |                       |            |
|----------------------------------|------------------|-----------------------------|-----------------------|------------|
| <b>Model</b>                     | <b>Converged</b> | <b>Number of parameters</b> | <b>Log-likelihood</b> | <b>AIC</b> |
| m3-av                            | 1                | 6                           | 295.53                | -579.06    |
| m3-bv                            | 1                | 6                           | 299.31                | -586.62    |
| m3-abv                           | 1                | 7                           | 303.85                | -593.7     |
| m5-av                            | 1                | 7                           | 296.24                | -578.48    |
| m5-bv                            | 1                | 7                           | 300.08                | -586.16    |
| m5-abv                           | 1                | 8                           | 305.28                | -594.56    |

AIC: Akaike's Information Criterion.

Best model with covariates is: m5-abv.  
 However, m3-abv is a reasonable model as well.

Selected model: m5-abv

The CED (in original units) and the 90 % C.I. for group f is:  
 2.6228  
 1.5775  
 9.7092

The CED (in original units) and the 90 % C.I. for group m is:  
 0.4182  
 0.23281  
 0.63349

File of Iverson data: IVERSONFDC

```

5
0    0    10    0    0
dose n    mean sd   sex
0    24    4.30 0.16  m
0.098 24    4.28 0.17  m
0.506 25    4.05 0.17  m
1.126 25    3.95 0.24  m
0    22    4.48 0.25  f
0.115 24    4.44 0.23  f
0.661 23    4.46 0.26  f
1.520 25    4.34 0.24  f

```

## Supplementary information IVERSON-concentration–response (Iverson et al., 1995)

Details of the BMD Analysis of the body weight data of Iverson et al. (1995) reported in Appendix G, Section G.2.2 of the Scientific Opinion on the risks to human and animal health related to the presence of deoxynivalenol and its acetylated and modified forms in food and feed - based on the concentration of DON. The data file is not shown below.

Folder IVERSON-1995-mice

Output from PROAST 62.6 from 13 OCT 2016

BMD analysis of **body weight data** of females (f: black curve) and males (m: red curve) combined:

Concentration-response analyses

Graphical output

body weight

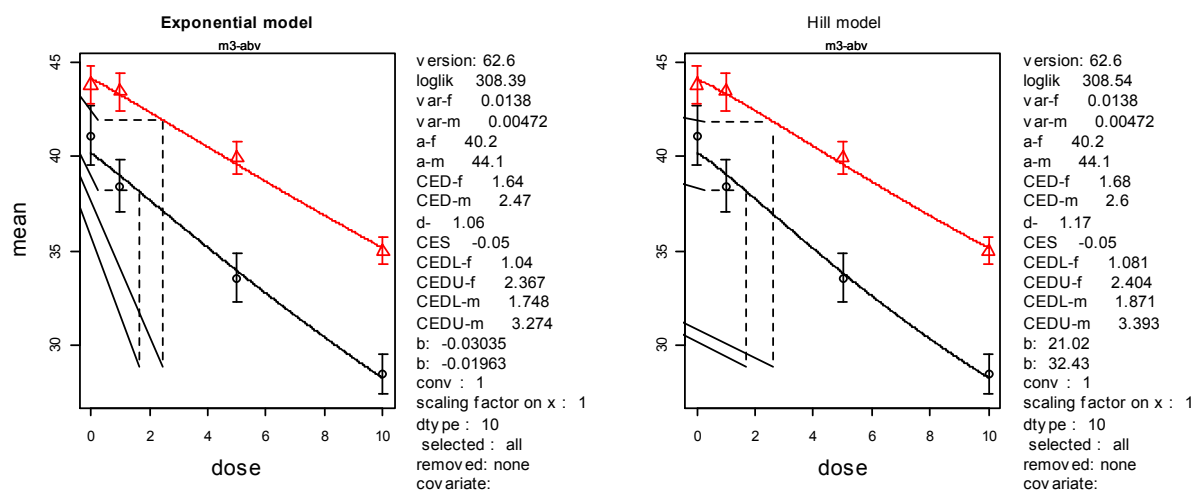

Numerical output

Response: mean

| ANALYSIS WITH EXPONENTIAL MODELS |           |                      |                |         |
|----------------------------------|-----------|----------------------|----------------|---------|
| Model                            | Converged | Number of parameters | Log-likelihood | AIC     |
| full                             | 1         | 9                    | 289.36         | -560.72 |
| full-v                           | 1         | 10                   | 310.36         | -600.72 |
| m1-v                             | 1         | 3                    | 135.59         | -265.18 |
| m1-av                            | 1         | 4                    | 162.95         | -317.9  |
| m2-ab                            | 1         | 5                    | 287.47         | -564.94 |
| m3-av                            | 1         | 6                    | 298.84         | -585.68 |
| m3-abv                           | 1         | 7                    | 308.39         | -602.78 |
| m5-av                            | 1         | 7                    | 298.84         | -583.68 |
| m5-abv                           | 1         | 8                    | 308.8          | -601.6  |

AIC: Akaike's Information Criterion.

Best model with covariates is: m3-abv.

However, m5-abv is a reasonable model as well.

Selected model: m3-abv

The CED (in orig. units) and the 90 % C.I. for group f is:  
 1.6374  
 1.0404  
 2.3674

The CED (in orig. units) and the 90 % C.I. for group m is:  
 2.4671  
 1.7484  
 3.2742

Response: mean

| ANALYSIS WITH HILL MODELS |           |                      |                |         |
|---------------------------|-----------|----------------------|----------------|---------|
| Model                     | Converged | Number of parameters | Log-likelihood | AIC     |
| m3-av                     | 1         | 6                    | 298.81         | -585.62 |
| m3-abv                    | 1         | 7                    | 308.54         | -603.08 |
| m5-av                     | 1         | 7                    | 298.81         | -583.62 |
| m5-abv                    | 1         | 8                    | 308.7          | -601.4  |

AIC: Akaike's Information Criterion.

Best model with covariates is: m3-abv.  
 However, m5-abv is a reasonable model as well.

Selected model: m3-abv

The CED (in original units) and the 90 % C.I. for group f is:  
 1.6831  
 1.0813  
 2.4044

The CED (in original units) and the 90 % C.I. for group m is:  
 2.5968  
 1.8713  
 3.3931

BMD analysis of **feed intake data** of females (f: black curve) and males (m: red curve) combined:  
 Concentration-response analyses

Graphical output

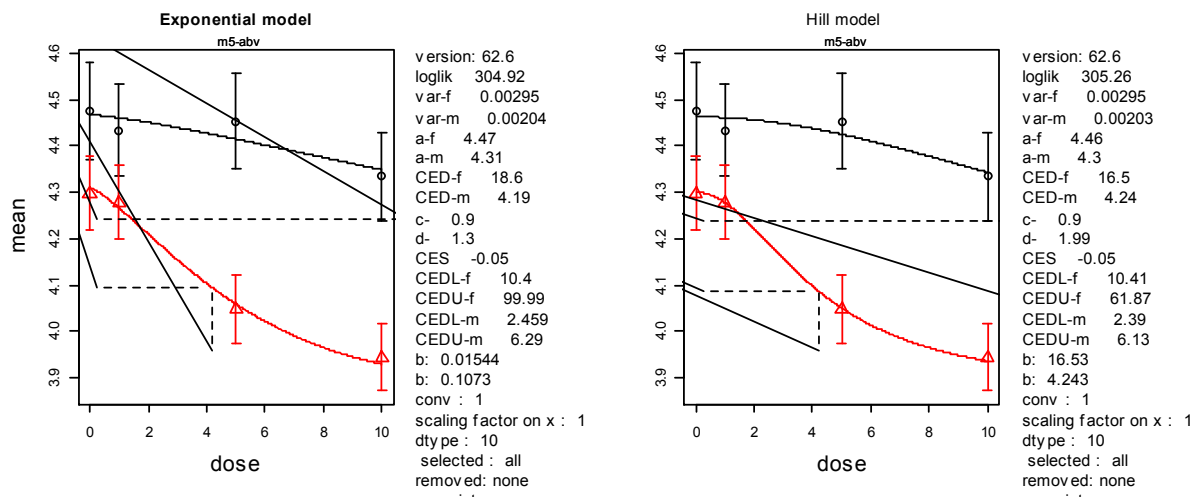

Numerical output

Response: mean

| <b>ANALYSIS WITH EXPONENTIAL MODELS</b> |                  |                             |                       |            |
|-----------------------------------------|------------------|-----------------------------|-----------------------|------------|
| <b>Model</b>                            | <b>Converged</b> | <b>Number of parameters</b> | <b>Log-likelihood</b> | <b>AIC</b> |
| full                                    | 1                | 9                           | 304.03                | -590.06    |
| full-v                                  | 1                | 10                          | 305.63                | -591.26    |
| m1-v                                    | 1                | 3                           | 249.86                | -493.72    |
| m1-av                                   | 1                | 4                           | 278.41                | -548.82    |
| m2-ab                                   | 1                | 5                           | 302.14                | -594.28    |
| m3-av                                   | 1                | 6                           | 298.01                | -584.02    |
| m3-bv                                   | 1                | 6                           | 299.47                | -586.94    |
| m3-abv                                  | 1                | 7                           | 278.41                | -542.82    |
| m5-av                                   | 1                | 7                           | 298.1                 | -582.2     |
| m5-bv                                   | 1                | 7                           | 249.86                | -485.72    |
| m5-abv                                  | 1                | 8                           | 304.92                | -593.84    |

AIC: Akaike's Information Criterion.

Best model with covariates is: m2-ab.  
However, m5-abv is a reasonable model as well.

Selected model: m5-abv

The CED (in original units) and the 90 % C.I. for group f is:

18.589  
10.397  
99.99

The CED (in original units) and the 90 % C.I. for group m is:

4.1924  
2.4587  
6.2895

Response: mean

| <b>ANALYSIS WITH HILL MODELS</b> |                  |                             |                       |            |
|----------------------------------|------------------|-----------------------------|-----------------------|------------|
| <b>Model</b>                     | <b>Converged</b> | <b>Number of parameters</b> | <b>Log-likelihood</b> | <b>AIC</b> |
| m3-av                            | 1                | 6                           | 298.02                | -584.04    |
| m3-bv                            | 1                | 6                           | 299.5                 | -587       |
| m3-abv                           | 1                | 7                           | 304.05                | -594.1     |
| m5-av                            | 1                | 7                           | 298.11                | -582.22    |
| m5-bv                            | 1                | 7                           | 300                   | -586       |
| m5-abv                           | 1                | 8                           | 305.26                | -594.52    |

AIC: Akaike's Information Criterion.

Best model with covariates is: m5-abv.  
However, m3-abv is a reasonable model as well.

Selected model: m5-abv

The CED (in original units) and the 90 % C.I. for group f is:

16.535  
10.409  
61.874

The CED (in original units) and the 90 % C.I. for group m is:

4.2431

2.3905

6.1303

**Supplementary information BONDY (Bondy et al., 2016)**

Details of the BMD Analysis of the body weight data of Bondy et al. (2016) reported in Appendix G, Section G.2.3 of the Scientific Opinion on the risks to human and animal health related to the presence of deoxynivalenol and its acetylated and modified forms in food and feed

Filename: bondy Folder bondy

The dose-response evaluation used the BMD approach for the body weight data reported as means and standard deviations (sd) of the two experiments on transgenic mice of type p53+/+ (hom) and p53+/- (het) genotypes (type), combined, as shown in the table below. The number of mice per dose group (n) was 10 except for the highest dose of the p53+/+ type.

| BONDYBW |    |      |     |      |
|---------|----|------|-----|------|
| dose    | n  | mean | sd  | type |
| mg/kg   |    |      |     |      |
| bw      |    |      |     |      |
| per day |    |      |     |      |
| 0       | 10 | 44.8 | 2.9 | hom  |
| 0.09    | 10 | 43.8 | 3.7 | hom  |
| 0.53    | 10 | 39.9 | 3.4 | hom  |
| 1.57    | 9  | 32.0 | 2.8 | hom  |
| 0       | 10 | 43.1 | 2.5 | het  |
| 0.09    | 10 | 42.5 | 4.9 | het  |
| 0.49    | 10 | 39.7 | 2.6 | het  |
| 1.5     | 10 | 32.9 | 2.3 | het  |

Data set used for PROAST 62.6 from 31 OCT 2016

Data set name: BONDYBW

Graphical output

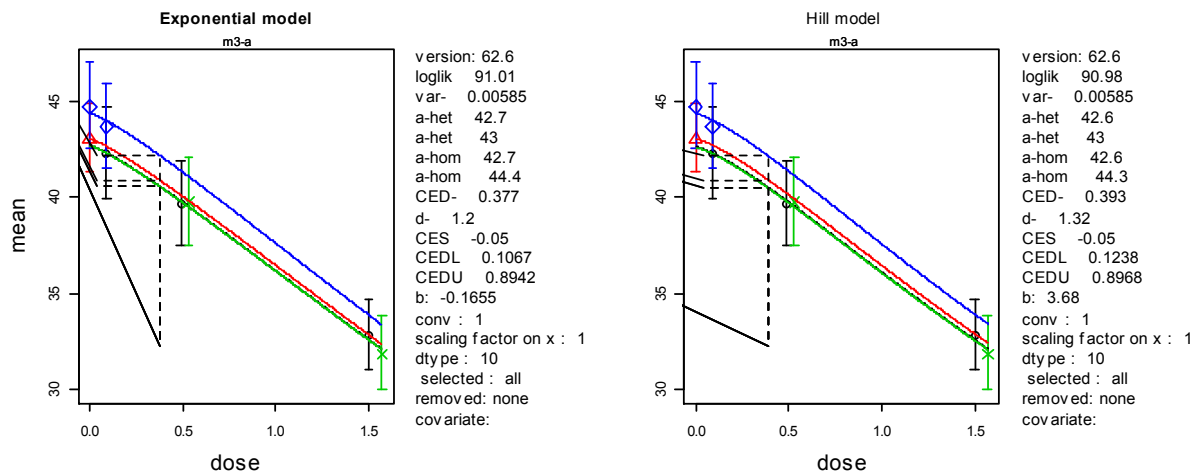



Numerical output

Response: mean

| <b>ANALYSIS WITH EXPONENTIAL MODELS</b> |                  |                             |                       |            |
|-----------------------------------------|------------------|-----------------------------|-----------------------|------------|
| <b>Model</b>                            | <b>Converged</b> | <b>Number of parameters</b> | <b>Log-likelihood</b> | <b>AIC</b> |
| full                                    | 1                | 9                           | 91.24                 | -164.48    |
| full-v                                  | 1                | 12                          | 92.44                 | -160.88    |
| m1-                                     | 1                | 2                           | 42.26                 | -80.52     |
| m1-a                                    | 1                | 5                           | 59.09                 | -108.18    |
| m2-ab                                   | 1                | 9                           | 91.2                  | -164.4     |
| m3-a                                    | 1                | 7                           | 91.01                 | -168.02    |
| m3-b                                    | 1                | 7                           | 90.22                 | -166.44    |
| m3-ab                                   | 1                | 10                          | 91.24                 | -162.48    |
| m5-a                                    | 1                | 8                           | 91.01                 | -166.02    |
| m5-b                                    | 1                | 8                           | 90.22                 | -164.44    |
| m5-ab                                   | 1                | 11                          | 91.24                 | -160.48    |

AIC: Akaike's Information Criterion.

Best model with covariates is: m3-a.

However, m3-b is a reasonable model as well, and so is m5-a.

Selected model: m3-a

The CED (in original units) and the 90 % C.I. is:

0.37725

0.1067

0.89421

Response: mean

| <b>ANALYSIS WITH HILL MODELS</b> |                  |                             |                       |            |
|----------------------------------|------------------|-----------------------------|-----------------------|------------|
| <b>Model</b>                     | <b>Converged</b> | <b>Number of parameters</b> | <b>Log-likelihood</b> | <b>AIC</b> |
| m3-a                             | 1                | 7                           | 90.98                 | -167.96    |
| m3-b                             | 0                | 7                           | 90.16                 | -166.32    |
| m3-ab                            | 1                | 10                          | 91.24                 | -162.48    |
| m5-a                             | 1                | 8                           | 90.98                 | -165.96    |
| m5-b                             | 1                | 8                           | 90.16                 | -164.32    |
| m5-ab                            | 1                | 11                          | 91.24                 | -160.48    |

AIC: Akaike's Information Criterion.

Best model with covariates is: m3-a.

However, m3-b is a reasonable model as well, and so is m5-a.

Selected model: m3-a

The CED (in original units) and the 90 % C.I. is:

0.39322

0.12379

0.89682

Tentative BMD Analysis of the data of Bondy et al. (2016) assuming the same doses and responses in a design with N=400 animals

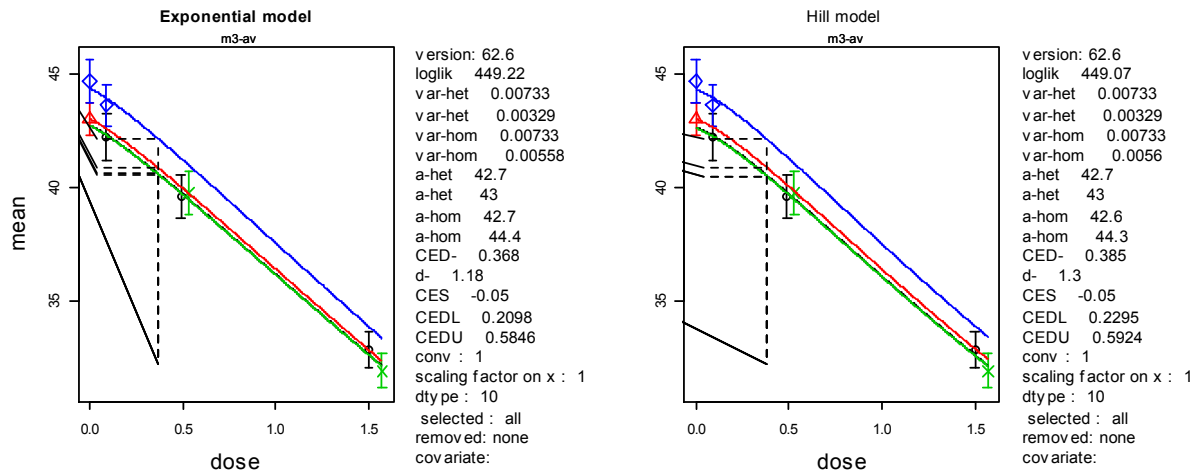

Response: mean

| ANALYSIS WITH EXPONENTIAL MODELS |           |                      |                |         |
|----------------------------------|-----------|----------------------|----------------|---------|
| Model                            | Converged | Number of parameters | Log-likelihood | AIC     |
| full                             | 1         | 9                    | 444.14         | -870.28 |
| full-v                           | 1         | 12                   | 450.24         | -876.48 |
| m1-v                             | 1         | 5                    | 230.71         | -451.42 |
| m1-av                            | 1         | 8                    | 329.12         | -642.24 |
| m2-ab                            | 1         | 9                    | 443.99         | -869.98 |
| m3-av                            | 1         | 10                   | 449.22         | -878.44 |
| m3-bv                            | 1         | 10                   | 444.89         | -869.78 |
| m3-abv                           | 1         | 13                   | 378.3          | -730.6  |
| m5-av                            | 1         | 11                   | 449.22         | -876.44 |
| m5-bv                            | 0         | 11                   | 234.21         | -446.42 |
| m5-abv                           | 1         | 14                   | 450.24         | -872.48 |

AIC: Akaike's Information Criterion.

Best model with covariates is: m3-av.  
However, m5-av is a reasonable model as well.

Selected model: m3-av

Calculating the confidence interval (C.I.)

The CED (in original units) and the 90 % C.I. is:  
0.36775  
0.20978  
0.58456

Response: mean

| <b>ANALYSIS WITH HILL MODELS</b> |                  |                             |                       |            |
|----------------------------------|------------------|-----------------------------|-----------------------|------------|
| <b>Model</b>                     | <b>Converged</b> | <b>Number of parameters</b> | <b>Log-likelihood</b> | <b>AIC</b> |
| m3-av                            | 1                | 10                          | 449.07                | -878.14    |
| m3-bv                            | 1                | 10                          | 444.64                | -869.28    |
| m3-abv                           | 1                | 13                          | 450.24                | -874.48    |
| m5-av                            | 1                | 11                          | 449.07                | -876.14    |
| m5-bv                            | 1                | 11                          | 444.64                | -867.28    |
| m5-abv                           | 1                | 14                          | 450.24                | -872.48    |

AIC: Akaike's Information Criterion.

Best model with covariates is: m3-av.  
However, m5-av is a reasonable model as well.

Selected model: m3-av

Calculating the confidence interval (C.I.)

The CED (in original units) and the 90 % C.I. is:  
0.38496  
0.22948  
0.5924

**Supplementary information SPRANDO2005ALL (Sprando et al., 2005)**

Details of the BMD Analysis of the body weight data of Sprando et al. (2005) reported in Appendix G, Section G.3.1 of the Scientific Opinion on the risks to human and animal health related to the presence of deoxynivalenol and its acetylated and modified forms in food and feed - in male SD rats

Filename: Sprando2005all Folder Sprando-2005

Output from PROAST 62.6 from 26 OCT 2016

**Data, graphic and numerical output for body weight**

SprandoBBWbis29

```

5
0 0 10 0 0
dose n mean sem sex
0 15 420.5 7.0 m
0.5 15 418.8 9.0 m
1 15 420.6 7.1 m
2.5 15 400.9 6.3 m
5 12 363.3 5.0 m
    
```

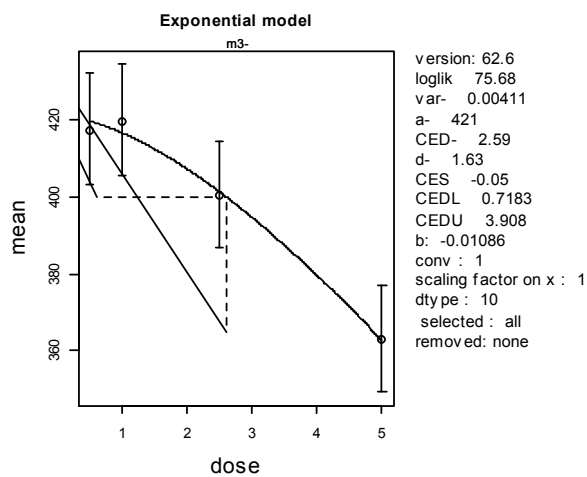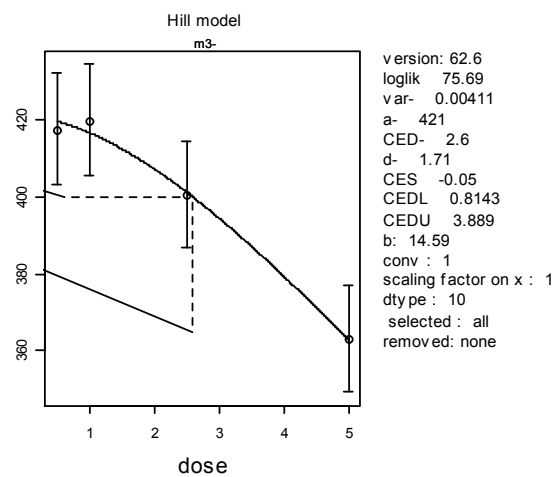

Response: mean

| ANALYSIS WITH EXPONENTIAL MODELS |           |                      |                |         |
|----------------------------------|-----------|----------------------|----------------|---------|
| Model                            | Converged | Number of parameters | Log-likelihood | AIC     |
| full                             | 1         | 5                    | 75.85          | -141.7  |
| m1-                              | 1         | 2                    | 59.9           | -115.8  |
| m2-                              | 1         | 3                    | 75.16          | -144.32 |
| m3-                              | 1         | 4                    | 75.68          | -143.36 |
| m5-                              | 1         | 5                    | 75.82          | -141.64 |

AIC: Akaike's Information Criterion.

Selected model: m3-

The CED (in original units) and the 90 % C.I. is:

- 2.5946
- 0.7183
- 3.9081

Response: mean

| ANALYSIS WITH HILL MODELS |           |                      |                |         |
|---------------------------|-----------|----------------------|----------------|---------|
| Model                     | Converged | Number of parameters | Log-likelihood | AIC     |
| m3-                       | 1         | 4                    | 75.69          | -143.38 |
| m5-                       | 1         | 5                    | 75.82          | -141.64 |

AIC: Akaike’s Information Criterion.

Selected model: m3-

The CED (in original units) and the 90 % C.I. is:

2.6033  
0.81428  
3.8893

**Data, graphic and numerical output for average body weight gain by day 29**

SprandoBWbis29

```

5
0 0 10 0 0
dose n mean sem sex
0 15 77.4 6.1 m
0.5 15 77.3 6.2 m
1 15 78.5 6.5 m
2.5 15 59.5 6.0 m
5 12 22.1 7.1 m
    
```

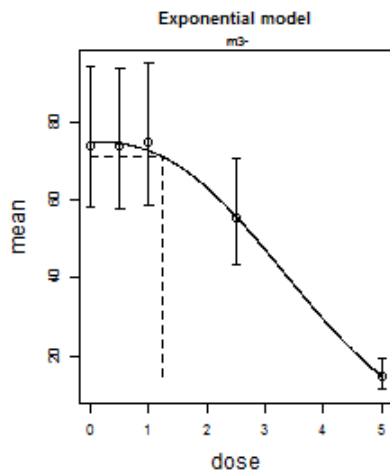

```

version: 62.6
loglik -45.15
var- 0.205
a- 75
CED- 1.23
d- 2.48
CES -0.05
CEDL 0.5906
CEDU 2.376
b: -0.03113
conv : 1
scaling factor on x : 1
dtype : 10
selected : all
removed: none
    
```

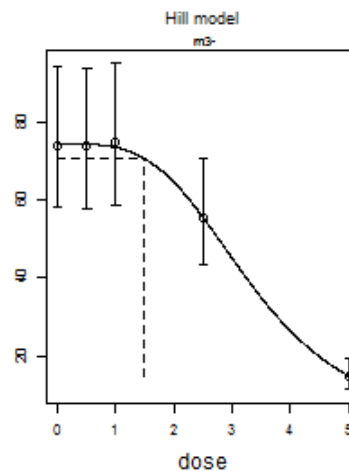

```

version: 62.6
loglik -45.12
var- 0.205
a- 74.5
CED- 1.48
d- 3.58
CES -0.05
CEDL 0.9195
CEDU 2.382
b: 3.378
conv : 1
scaling factor on x : 1
dtype : 10
selected : all
removed: none
    
```

Response: mean

| ANALYSIS WITH EXPONENTIAL MODELS |           |                      |                |        |
|----------------------------------|-----------|----------------------|----------------|--------|
| Model                            | Converged | Number of parameters | Log-likelihood | AIC    |
| full                             | 1         | 6                    | -45.11         | 102.22 |
| m1-                              | 1         | 2                    | -80.52         | 165.04 |
| m2-                              | 1         | 3                    | -51.49         | 108.98 |
| m3-                              | 1         | 4                    | -45.15         | 98.3   |
| m5-                              | 1         | 5                    | -45.11         | 100.22 |

AIC: Akaike’s Information Criterion.

Selected model: m3-

The CED (in original units) and the 90 % C.I. is:  
 1.2253  
 0.5906  
 2.3756

Response: mean

| ANALYSIS WITH HILL MODELS |           |                      |                |        |
|---------------------------|-----------|----------------------|----------------|--------|
| Model                     | Converged | Number of parameters | Log-likelihood | AIC    |
| m3-                       | 1         | 4                    | -45.12         | 98.24  |
| m5-                       | 0         | 5                    | -45.11         | 100.22 |

AIC: Akaike's Information Criterion.

Selected model: m3-

The CED (in original units) and the 90 % C.I. is:  
 1.4788  
 0.91953  
 2.3824

**Data, graphic and numerical output for average feed consumption**

SprandoAFbis29

|      |    |       |      |     |
|------|----|-------|------|-----|
| 5    |    |       |      |     |
| 0    | 0  | 10    | 0    | 0   |
| dose | n  | mean  | sem  | sex |
| 0    | 15 | 621.3 | 14.7 | m   |
| 0.5  | 15 | 617.5 | 17.0 | m   |
| 1    | 15 | 613.6 | 15.0 | m   |
| 2.5  | 15 | 584.7 | 13.2 | m   |
| 5    | 12 | 502.1 | 12.6 | m   |

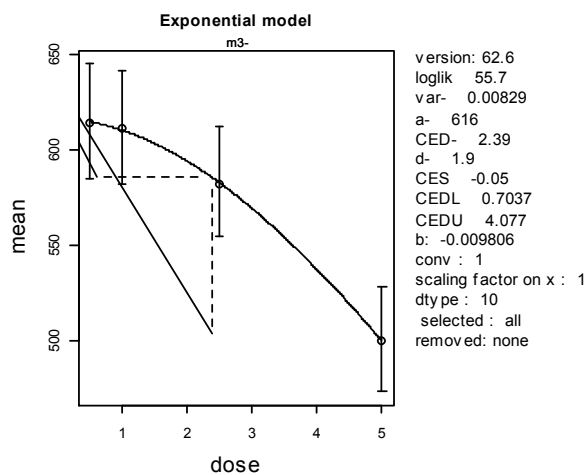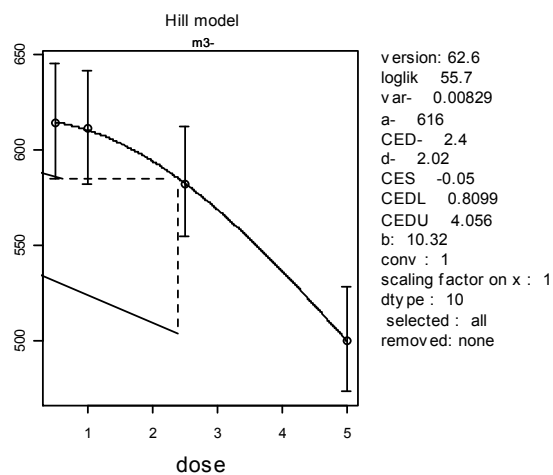

Response: mean

| <b>ANALYSIS WITH EXPONENTIAL MODELS</b> |                  |                             |                       |            |
|-----------------------------------------|------------------|-----------------------------|-----------------------|------------|
| <b>Model</b>                            | <b>Converged</b> | <b>Number of parameters</b> | <b>Log-likelihood</b> | <b>AIC</b> |
| full                                    | 1                | 5                           | 55.71                 | -101.42    |
| m1-                                     | 1                | 2                           | 39.84                 | -75.68     |
| m2-                                     | 1                | 3                           | 54.85                 | -103.7     |
| m3-                                     | 1                | 4                           | 55.7                  | -103.4     |
| m5-                                     | 1                | 5                           | 55.71                 | -101.42    |

AIC: Akaike's Information Criterion.

Selected model: m3-

The CED (in original units) and the 90 % C.I. is:

2.3894  
0.70372  
4.0772

Response: mean

| <b>ANALYSIS WITH HILL MODELS</b> |                  |                             |                       |            |
|----------------------------------|------------------|-----------------------------|-----------------------|------------|
| <b>Model</b>                     | <b>Converged</b> | <b>Number of parameters</b> | <b>Log-likelihood</b> | <b>AIC</b> |
| m3-                              | 1                | 4                           | 55.7                  | -103.4     |
| m5-                              | 1                | 5                           | 55.71                 | -101.42    |

AIC: Akaike's Information Criterion.

Selected model: m3-

The CED (in original units) and the 90 % C.I. is:

2.405  
0.80992  
4.0561

## Supplementary information COLLINS (Collins et al., 2006)

Details of the BMD Analysis of the data of Collins et al. (2006) reported in Appendix G, Section G.3.2 of the Scientific Opinion on the risks to human and animal health related to the presence of deoxynivalenol and its acetylated and modified forms in food and feed

Filename: Collins

Folder: Collins-2006

Output from PROAST 62.6 from 24 OCT 2016

### Data, graphic and numerical output for body weight

COLLINSBW

5

| dose | n  | mean   | sem  | s |
|------|----|--------|------|---|
| 0    | 23 | 362.22 | 4.31 | s |
| 0.5  | 22 | 367.86 | 4.94 | s |
| 1    | 22 | 355.86 | 5.99 | s |
| 2.5  | 21 | 357.43 | 5.59 | s |
| 5    | 23 | 286.22 | 9.83 | s |

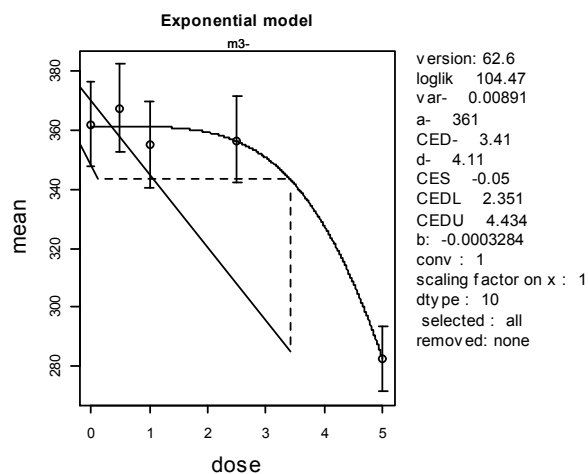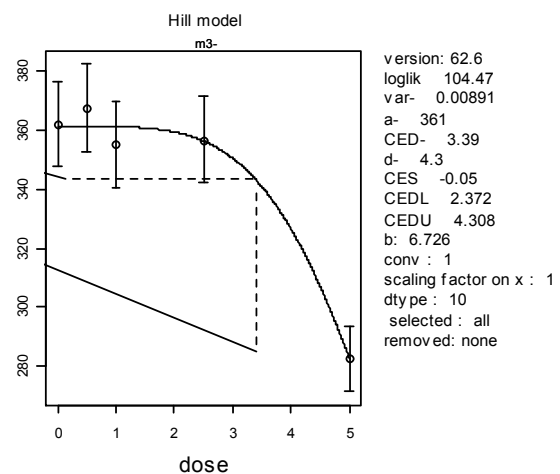

Response: mean

#### ANALYSIS WITH EXPONENTIAL MODELS

| Model | Converged | Number of parameters | Log-likelihood | AIC     |
|-------|-----------|----------------------|----------------|---------|
| full  | 1         | 6                    | 105.2          | -198.4  |
| m1-   | 1         | 2                    | 63.57          | -123.14 |
| m2-   | 1         | 3                    | 96.12          | -186.24 |
| m3-   | 1         | 4                    | 104.47         | -200.94 |
| m5-   | 1         | 5                    | 104.47         | -198.94 |

AIC: Akaike's Information Criterion.

Selected model: m3-

ATTENTION: jump in log-likelihood

The CED (in original units) and the 90 % C.I. is:

3.4145  
2.3508  
4.4344



Response: mean

| ANALYSIS WITH HILL MODELS |           |                      |                |         |
|---------------------------|-----------|----------------------|----------------|---------|
| Model                     | Converged | Number of parameters | Log-likelihood | AIC     |
| m3-                       | 1         | 4                    | 104.47         | -200.94 |
| m5-                       | 1         | 5                    | 104.47         | -198.94 |

AIC: Akaike's Information Criterion.

Selected model: m3-

The CED (in original units) and the 90 % C.I. is:

3.393  
2.3725  
4.3085

**Data, graphic and numerical output for body weight gain**

COLLINSBWGAIN

```
5
0 0 10 0 0
dose n mean SEM s
0 23 130.7 3.1 s
0.5 22 130.4 4.9 s
2 22 120.8 6 s
2.5 21 118.1 4.9 s
5 23 52.9 9.3 s
```

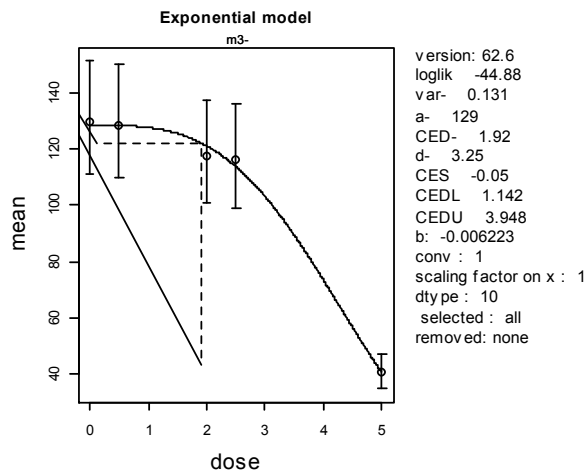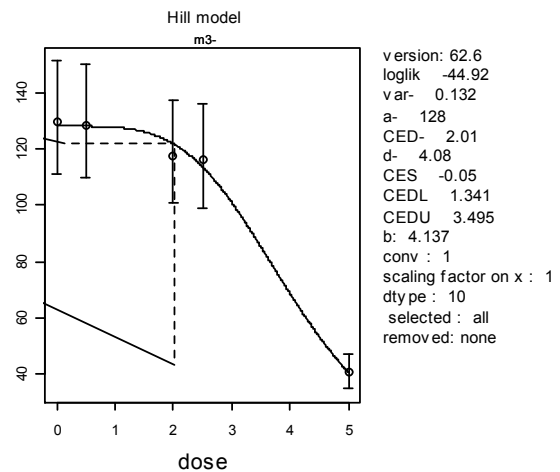

Response: mean

| ANALYSIS WITH EXPONENTIAL MODELS |           |                      |                |        |
|----------------------------------|-----------|----------------------|----------------|--------|
| Model                            | Converged | Number of parameters | Log-likelihood | AIC    |
| full                             | 1         | 6                    | -44.76         | 101.52 |
| m1-                              | 1         | 2                    | -97.03         | 198.06 |
| m2-                              | 1         | 3                    | -58.7          | 123.4  |
| m3-                              | 1         | 4                    | -44.88         | 97.76  |
| m5-                              | 1         | 5                    | -44.88         | 99.76  |

AIC: Akaike's Information Criterion.

Selected model: m3-

ATTENTION: jump in log-likelihood

The CED (in original units) and the 90 % C.I. is:  
 1.9152  
 1.1416  
 3.9485

Response: mean

| ANALYSIS WITH HILL MODELS |           |                      |                |       |
|---------------------------|-----------|----------------------|----------------|-------|
| Model                     | Converged | Number of parameters | Log-likelihood | AIC   |
| m3-                       | 1         | 4                    | -44.92         | 97.84 |
| m5-                       | 1         | 5                    | -44.92         | 99.84 |

AIC: Akaike's Information Criterion.  
 Selected model: m3-

The CED (in original units) and the 90 % C.I. is:  
 2.0099  
 1.3406  
 3.4947

**a) Data, graphic and numerical output for feed intake**

COLLINSFC

```

5
0 0 10 0 0
dose n mean sem s
0 23 434.3 7.7 s
0.5 22 445.3 5.3 s
1 22 446.1 7.2 s
2.5 21 421.0 9.3 s
5 23 342.6 10.5 s
    
```

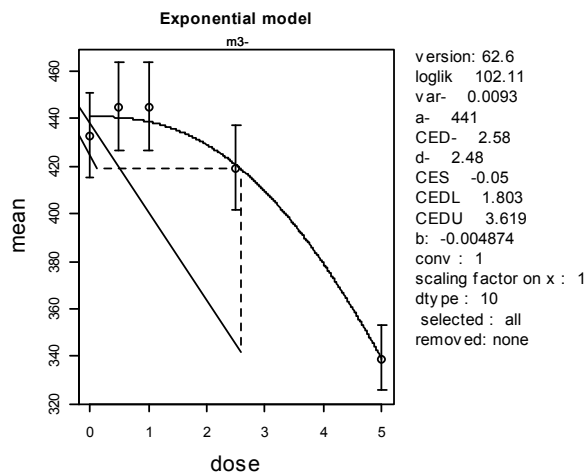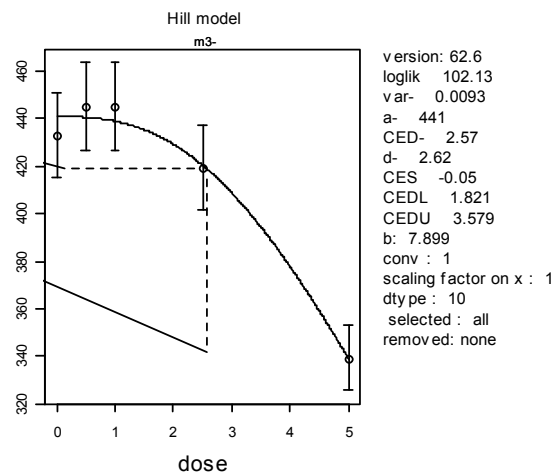

Response: mean

| <b>ANALYSIS WITH EXPONENTIAL MODELS</b> |                  |                             |                       |            |
|-----------------------------------------|------------------|-----------------------------|-----------------------|------------|
| <b>Model</b>                            | <b>Converged</b> | <b>Number of parameters</b> | <b>Log-likelihood</b> | <b>AIC</b> |
| full                                    | 1                | 6                           | 102.89                | -193.78    |
| m1-                                     | 1                | 2                           | 59.84                 | -115.68    |
| m2-                                     | 1                | 3                           | 95.25                 | -184.5     |
| m3-                                     | 1                | 4                           | 102.11                | -196.22    |
| m5-                                     | 1                | 5                           | 102.28                | -194.56    |

AIC: Akaike's Information Criterion.

Selected model: m3-

The CED (in original units) and the 90 % C.I. is:

2.5844

1.803

3.6194

Response: mean

| <b>ANALYSIS WITH HILL MODELS</b> |                  |                             |                       |            |
|----------------------------------|------------------|-----------------------------|-----------------------|------------|
| <b>Model</b>                     | <b>Converged</b> | <b>Number of parameters</b> | <b>Log-likelihood</b> | <b>AIC</b> |
| m3-                              | 1                | 4                           | 102.13                | -196.26    |
| m5-                              | 1                | 5                           | 102.28                | -194.56    |

AIC: Akaike's Information Criterion.

Selected model: m3-

The CED (in original units) and the 90 % C.I. is:

2.5722

1.8213

3.5788

## Supplementary information YOUNGBMC (Young et al., 1983)

Details of the BMD Analysis of concentration-response data for vomiting in pigs of Young et al. (1983) trials 2 and 3 reported in Appendix G, Section G.4.1.1 of the Scientific Opinion on the risks to human and animal health related to the presence of deoxynivalenol and its acetylated and modified forms in food and feed

Filename: YoungBMC Folder: PigsVomiting

Output from BMDS from 11 DEC 2016 with the full information of the fit of all models of BMDS where a model fit was obtained in a reasonable duration of computing time.

The output is ordered in the sequence used in the Table G11 of Appendix G which is based on an order of increasing mathematical complexity. The two less complex multistage models are nested under the multistage model which was used with the default assumption of the degree of the polynomial of BMDS.

Occasionally, it was not possible to obtain the results of the Gamma model with the notebook used for the calculation HP8440p or Lenovo 3508.

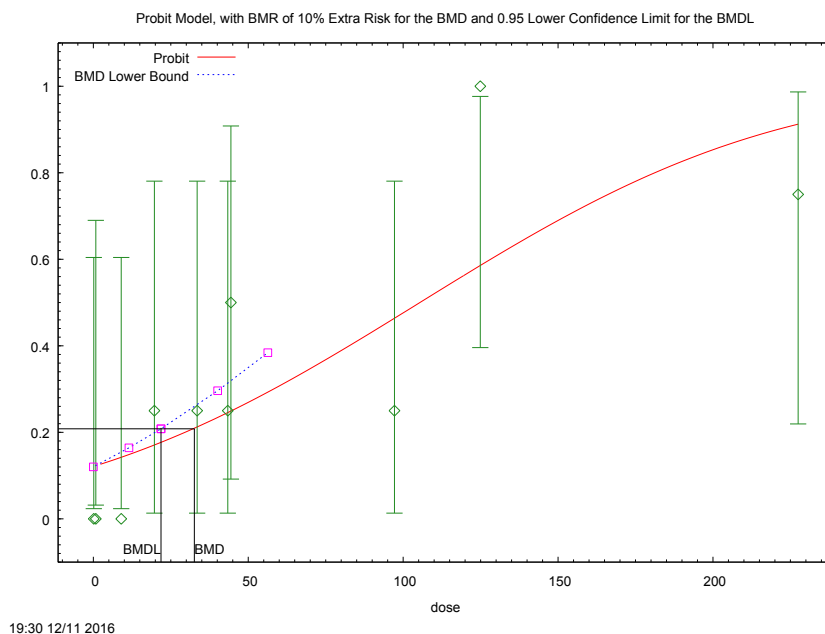

```

=====
Probit Model. (Version: 3.3; Date: 2/28/2013)
Input Data File:
C:/Users/edler/Desktop/BMDS2601_20150629/BMDS2601/Data/pro_DONYoungnew_Opt. (d)
Gnuplot Plotting File:
C:/Users/edler/Desktop/BMDS2601_20150629/BMDS2601/Data/pro_DONYoungnew_Opt.plt
Sun Dec 11 19:30:08 2016
=====

```

BMDS\_Model\_Run

~~~~~

The form of the probability function is:

$$P[\text{response}] = \text{CumNorm}(\text{Intercept} + \text{Slope} * \text{Dose}),$$

where CumNorm(.) is the cumulative normal distribution function

Dependent variable = Effect  
 Independent variable = concentration  
 Slope parameter is not restricted

Total number of observations = 10  
 Total number of records with missing values = 0  
 Maximum number of iterations = 500  
 Relative Function Convergence has been set to: 1e-008  
 Parameter Convergence has been set to: 1e-008

Default Initial (and Specified) Parameter Values

background = 0 Specified  
 intercept = -1.18699  
 slope = 0.0110622

Asymptotic Correlation Matrix of Parameter Estimates

( \*\*\* The model parameter(s) -background  
 have been estimated at a boundary point, or have been specified by  
 the user,  
 and do not appear in the correlation matrix )

|           | intercept | slope |
|-----------|-----------|-------|
| intercept | 1         | -0.72 |
| slope     | -0.72     | 1     |

Parameter Estimates

| Interval | Variable  | Estimate  | Std. Err.  | 95.0% Wald Confidence |       |
|----------|-----------|-----------|------------|-----------------------|-------|
|          |           |           |            | Lower Conf. Limit     | Upper |
| 0.523277 | intercept | -1.17418  | 0.332101   | -1.82509              | -     |
| 0.018181 | slope     | 0.0110833 | 0.00362131 | 0.00398569            |       |

Analysis of Deviance Table

| Model         | Log(likelihood) | # Param's | Deviance | Test d.f. | P-value |
|---------------|-----------------|-----------|----------|-----------|---------|
| Full model    | -14.0193        | 10        |          |           |         |
| Fitted model  | -19.2082        | 2         | 10.3778  | 8         | 0.2395  |
| Reduced model | -24.8241        | 1         | 21.6095  | 9         | 0.0102  |
| AIC:          | 42.4163         |           |          |           |         |

Goodness of Fit

| Dose    | Est._Prob. | Expected | Observed | Size  | Scaled Residual |
|---------|------------|----------|----------|-------|-----------------|
| 0.1400  | 0.1205     | 0.482    | 0.000    | 4.000 | -0.740          |
| 9.0000  | 0.1413     | 0.565    | 0.000    | 4.000 | -0.811          |
| 19.7000 | 0.1696     | 0.678    | 1.000    | 4.000 | 0.429           |
| 33.5000 | 0.2110     | 0.844    | 1.000    | 4.000 | 0.191           |
| 43.4000 | 0.2441     | 0.976    | 1.000    | 4.000 | 0.027           |
| 44.4000 | 0.2476     | 0.990    | 2.000    | 4.000 | 1.170           |
| 97.2000 | 0.4614     | 1.846    | 1.000    | 4.000 | -0.848          |

|          |        |       |       |       |        |
|----------|--------|-------|-------|-------|--------|
| 124.9000 | 0.5832 | 2.333 | 4.000 | 4.000 | 1.691  |
| 227.5000 | 0.9111 | 3.644 | 3.000 | 4.000 | -1.132 |
| 0.7900   | 0.1219 | 0.366 | 0.000 | 3.000 | -0.645 |

Chi<sup>2</sup> = 8.07      d.f. = 8      P-value = 0.4267

Benchmark Dose Computation

Specified effect = 0.1  
 Risk Type = Extra risk  
 Confidence level = 0.95  
 BMD = 32.5992  
 BMDL = 21.8348

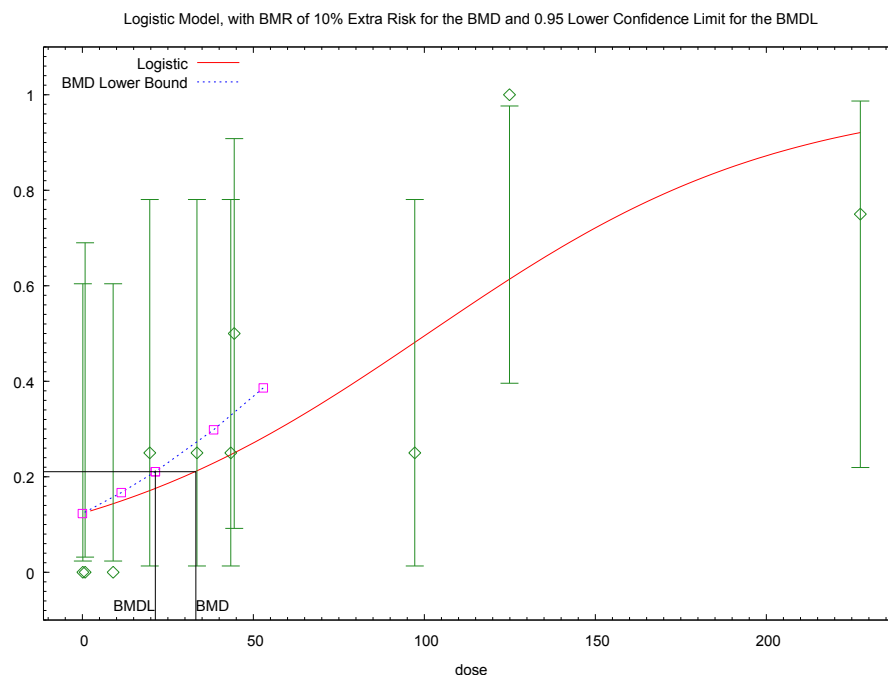

19:33 12/11 2016

```

=====
Logistic Model. (Version: 2.14; Date: 2/28/2013)
Input Data File:
C:/Users/edler/Desktop/BMDS2601_20150629/BMDS2601/Data/log_DONYoungnew_Opt.(d)
Gnuplot Plotting File:
C:/Users/edler/Desktop/BMDS2601_20150629/BMDS2601/Data/log_DONYoungnew_Opt.plt
Sun Dec 11 19:33:56 2016
=====
    
```

BMDS\_Model\_Run

The form of the probability function is:

$$P[\text{response}] = 1/[1+\text{EXP}(-\text{intercept}-\text{slope}*\text{dose})]$$

Dependent variable = Effect  
 Independent variable = concentration  
 Slope parameter is not restricted

Total number of observations = 10  
 Total number of records with missing values = 0

Maximum number of iterations = 500  
 Relative Function Convergence has been set to: 1e-008  
 Parameter Convergence has been set to: 1e-008

Default Initial Parameter Values  
 background = 0 Specified  
 intercept = -1.55631  
 slope = 0.0147838

Asymptotic Correlation Matrix of Parameter Estimates

( \*\*\* The model parameter(s) -background  
 have been estimated at a boundary point, or have been specified by  
 the user,  
 and do not appear in the correlation matrix )

|           | intercept | slope |
|-----------|-----------|-------|
| intercept | 1         | -0.74 |
| slope     | -0.74     | 1     |

Parameter Estimates

| Interval  | Variable  | Estimate  | Std. Err.  | 95.0% Wald Confidence |       |
|-----------|-----------|-----------|------------|-----------------------|-------|
|           |           |           |            | Lower Conf. Limit     | Upper |
| 0.787695  | intercept | -1.96486  | 0.600604   | -3.14202              | -     |
| 0.0335094 | slope     | 0.0194038 | 0.00719684 | 0.0052983             |       |

Analysis of Deviance Table

| Model         | Log(likelihood) | # Param's | Deviance | Test d.f. | P-value |
|---------------|-----------------|-----------|----------|-----------|---------|
| Full model    | -14.0193        | 10        |          |           |         |
| Fitted model  | -19.1784        | 2         | 10.3182  | 8         | 0.2434  |
| Reduced model | -24.8241        | 1         | 21.6095  | 9         | 0.0102  |
| AIC:          | 42.3568         |           |          |           |         |

Goodness of Fit

| Dose     | Est._Prob. | Expected | Observed | Size  | Scaled Residual |
|----------|------------|----------|----------|-------|-----------------|
| 0.1400   | 0.1232     | 0.493    | 0.000    | 4.000 | -0.750          |
| 9.0000   | 0.1430     | 0.572    | 0.000    | 4.000 | -0.817          |
| 19.7000  | 0.1704     | 0.682    | 1.000    | 4.000 | 0.423           |
| 33.5000  | 0.2117     | 0.847    | 1.000    | 4.000 | 0.188           |
| 43.4000  | 0.2455     | 0.982    | 1.000    | 4.000 | 0.021           |
| 44.4000  | 0.2491     | 0.996    | 2.000    | 4.000 | 1.160           |
| 97.2000  | 0.4803     | 1.921    | 1.000    | 4.000 | -0.922          |
| 124.9000 | 0.6127     | 2.451    | 4.000    | 4.000 | 1.590           |
| 227.5000 | 0.9205     | 3.682    | 3.000    | 4.000 | -1.261          |
| 0.7900   | 0.1246     | 0.374    | 0.000    | 3.000 | -0.653          |

Chi^2 = 8.19      d.f. = 8      P-value = 0.4155

Benchmark Dose Computation

Specified effect = 0.1  
 Risk Type = Extra risk  
 Confidence level = 0.95  
 BMD = 33.1808  
 BMDL = 21.3329

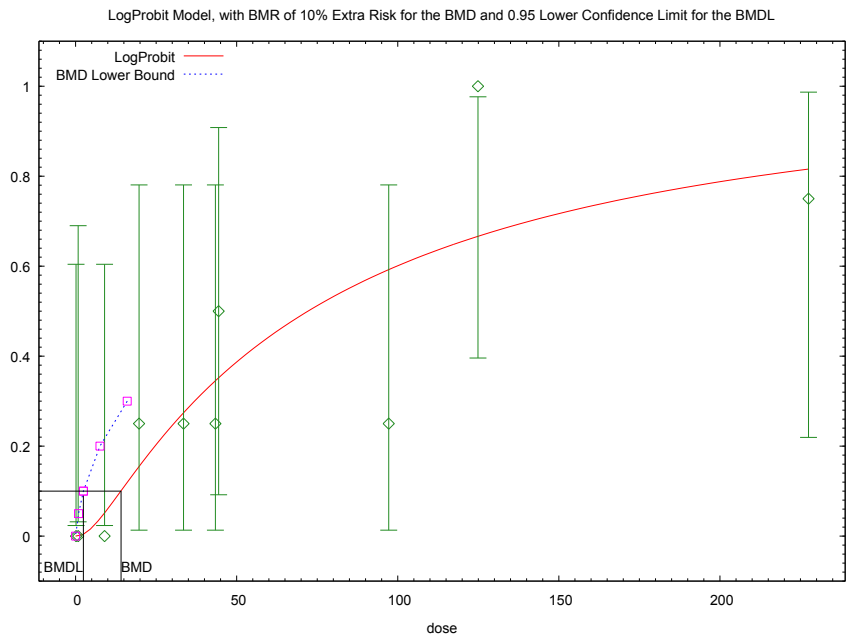

19:35 12/11 2016

```
=====  

    Probit Model. (Version: 3.3; Date: 2/28/2013)  

    Input Data File:  

    C:/Users/edler/Desktop/BMDS2601_20150629/BMDS2601/Data/lnp_DONYoungnew_Opt.(d)  

    Gnuplot Plotting File:  

    C:/Users/edler/Desktop/BMDS2601_20150629/BMDS2601/Data/lnp_DONYoungnew_Opt.plt  

    Sun Dec 11 19:35:38 2016  

    =====
```

BMDS\_Model\_Run

The form of the probability function is:

$$P[\text{response}] = \text{Background} + (1 - \text{Background}) * \text{CumNorm}(\text{Intercept} + \text{Slope} * \text{Log}(\text{Dose})),$$

where CumNorm(.) is the cumulative normal distribution function

Dependent variable = Effect  
 Independent variable = concentration  
 Slope parameter is not restricted

Total number of observations = 10  
 Total number of records with missing values = 0  
 Maximum number of iterations = 500  
 Relative Function Convergence has been set to: 1e-008  
 Parameter Convergence has been set to: 1e-008



User has chosen the log transformed model

Default Initial (and Specified) Parameter Values

background = 0  
 intercept = -1.20344  
 slope = 0.261415

Asymptotic Correlation Matrix of Parameter Estimates

( \*\*\* The model parameter(s) -background have been estimated at a boundary point, or have been specified by the user, and do not appear in the correlation matrix )

|           | intercept | slope |
|-----------|-----------|-------|
| intercept | 1         | -0.98 |
| slope     | -0.98     | 1     |

Parameter Estimates

|             |            | 95.0% Wald Confidence |           |                   |       |
|-------------|------------|-----------------------|-----------|-------------------|-------|
| Interval    | Variable   | Estimate              | Std. Err. | Lower Conf. Limit | Upper |
| Conf. Limit | background | 0                     | NA        |                   |       |
| 0.996006    | intercept  | -3.35488              | 1.20353   | -5.71375          | -     |
| 1.35504     | slope      | 0.783306              | 0.291705  | 0.211574          |       |

NA - Indicates that this parameter has hit a bound implied by some inequality constraint and thus has no standard error.

Analysis of Deviance Table

| Model         | Log(likelihood) | # Param's | Deviance | Test d.f. | P-value |
|---------------|-----------------|-----------|----------|-----------|---------|
| Full model    | -14.0193        | 10        |          |           |         |
| Fitted model  | -17.2699        | 2         | 6.50131  | 8         | 0.5913  |
| Reduced model | -24.8241        | 1         | 21.6095  | 9         | 0.0102  |

AIC: 38.5399

Goodness of Fit

| Dose     | Est._Prob. | Expected | Observed | Size  | Scaled Residual |
|----------|------------|----------|----------|-------|-----------------|
| 0.1400   | 0.0000     | 0.000    | 0.000    | 4.000 | -0.001          |
| 9.0000   | 0.0512     | 0.205    | 0.000    | 4.000 | -0.464          |
| 19.7000  | 0.1538     | 0.615    | 1.000    | 4.000 | 0.533           |
| 33.5000  | 0.2728     | 1.091    | 1.000    | 4.000 | -0.103          |
| 43.4000  | 0.3440     | 1.376    | 1.000    | 4.000 | -0.396          |
| 44.4000  | 0.3506     | 1.403    | 2.000    | 4.000 | 0.626           |
| 97.2000  | 0.5910     | 2.364    | 1.000    | 4.000 | -1.387          |
| 124.9000 | 0.6651     | 2.661    | 4.000    | 4.000 | 1.419           |
| 227.5000 | 0.8149     | 3.260    | 3.000    | 4.000 | -0.334          |
| 0.7900   | 0.0002     | 0.001    | 0.000    | 3.000 | -0.025          |

Chi<sup>2</sup> = 5.11      d.f. = 8      P-value = 0.7458

Benchmark Dose Computation

Specified effect = 0.1  
 Risk Type = Extra risk  
 Confidence level = 0.95  
 BMD = 14.1101  
 BMDL = 2.41926

Log-Logistic restricted

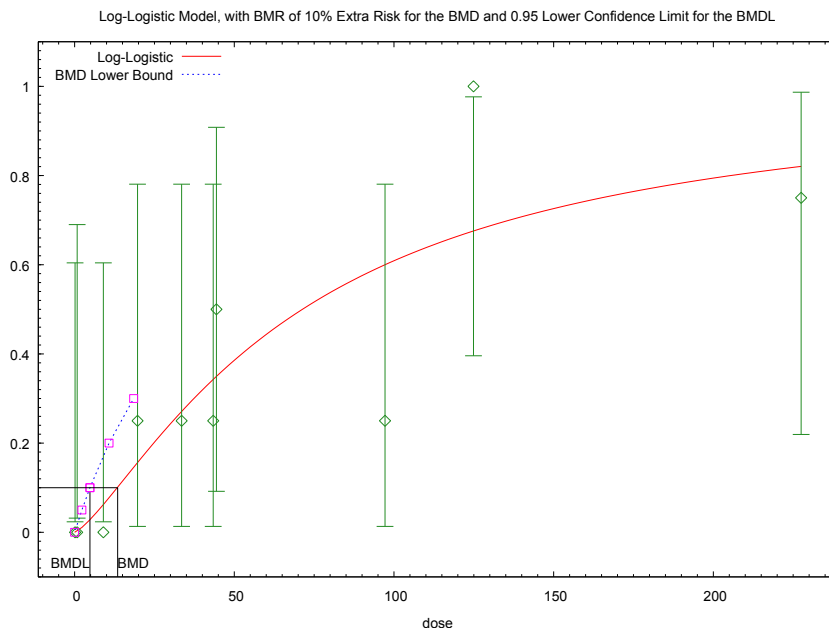

19:37 12/11 2016

```
=====
      Logistic Model. (Version: 2.14; Date: 2/28/2013)
      Input Data File:
C:/Users/edler/Desktop/BMDS2601_20150629/BMDS2601/Data/lnl_DONYoungnew_Opt.(d)
      Gnuplot Plotting File:
C:/Users/edler/Desktop/BMDS2601_20150629/BMDS2601/Data/lnl_DONYoungnew_Opt.plt
      Sun Dec 11 19:37:27 2016
=====
```

BMDS\_Model\_Run

The form of the probability function is:

$$P[\text{response}] = \text{background} + (1 - \text{background}) / [1 + \text{EXP}(-\text{intercept} - \text{slope} * \text{Log}(\text{dose}))]$$

Dependent variable = Effect  
 Independent variable = concentration  
 Slope parameter is restricted as slope >= 1

Total number of observations = 10  
 Total number of records with missing values = 0  
 Maximum number of iterations = 500  
 Relative Function Convergence has been set to: 1e-008

Parameter Convergence has been set to: 1e-008

User has chosen the log transformed model

Default Initial Parameter Values

```
background = 0
intercept = -4.65793
slope = 1
```

Asymptotic Correlation Matrix of Parameter Estimates

( \*\*\* The model parameter(s) -background have been estimated at a boundary point, or have been specified by the user, and do not appear in the correlation matrix )

|           | intercept | slope |
|-----------|-----------|-------|
| intercept | 1         | -0.98 |
| slope     | -0.98     | 1     |

Parameter Estimates

| Interval    | Variable   | Estimate | Std. Err. | 95.0% Wald Confidence |       |
|-------------|------------|----------|-----------|-----------------------|-------|
|             |            |          |           | Lower Conf. Limit     | Upper |
| Conf. Limit | background | 0        | NA        |                       |       |
| 1.46407     | intercept  | -5.59213 | 2.1062    | -9.7202               | -     |
| 2.30082     | slope      | 1.30533  | 0.507913  | 0.309842              |       |

NA - Indicates that this parameter has hit a bound implied by some inequality constraint and thus has no standard error.

Analysis of Deviance Table

| Model         | Log(likelihood) | # Param's | Deviance | Test d.f. | P-value |
|---------------|-----------------|-----------|----------|-----------|---------|
| Full model    | -14.0193        | 10        |          |           |         |
| Fitted model  | -17.316         | 2         | 6.5934   | 8         | 0.5811  |
| Reduced model | -24.8241        | 1         | 21.6095  | 9         | 0.0102  |

AIC: 38.632

Goodness of Fit

| Dose     | Est._Prob. | Expected | Observed | Size  | Scaled Residual |
|----------|------------|----------|----------|-------|-----------------|
| 0.1400   | 0.0003     | 0.001    | 0.000    | 4.000 | -0.034          |
| 9.0000   | 0.0616     | 0.246    | 0.000    | 4.000 | -0.512          |
| 19.7000  | 0.1543     | 0.617    | 1.000    | 4.000 | 0.530           |
| 33.5000  | 0.2673     | 1.069    | 1.000    | 4.000 | -0.078          |
| 43.4000  | 0.3384     | 1.354    | 1.000    | 4.000 | -0.374          |
| 44.4000  | 0.3451     | 1.380    | 2.000    | 4.000 | 0.652           |
| 97.2000  | 0.5944     | 2.377    | 1.000    | 4.000 | -1.403          |
| 124.9000 | 0.6703     | 2.681    | 4.000    | 4.000 | 1.403           |

|          |        |       |       |       |        |
|----------|--------|-------|-------|-------|--------|
| 227.5000 | 0.8164 | 3.266 | 3.000 | 4.000 | -0.343 |
| 0.7900   | 0.0027 | 0.008 | 0.000 | 3.000 | -0.091 |

Chi^2 = 5.18      d.f. = 8      P-value = 0.7386

Benchmark Dose Computation

```

Specified effect =          0.1
Risk Type       =          Extra risk
Confidence level =          0.95
                BMD =          13.4745
                BMDL =          4.79127
    
```

loglog unrestricted

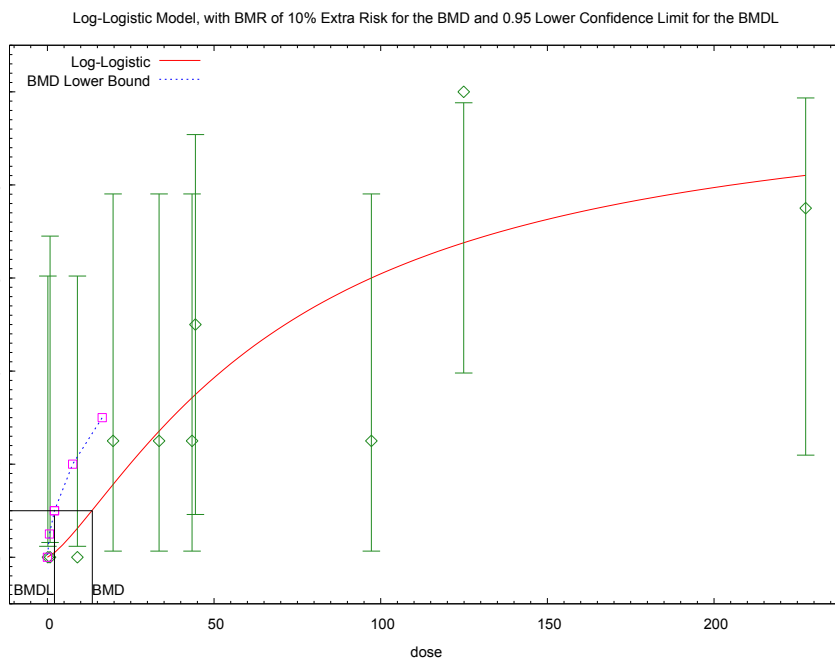

19:40 12/11 2016

```

=====
Logistic Model. (Version: 2.14; Date: 2/28/2013)
Input Data File:
C:/Users/edler/Desktop/BMDS2601_20150629/BMDS2601/Data/lnl_DONYoungnew_Opt. (d)
Gnuplot Plotting File:
C:/Users/edler/Desktop/BMDS2601_20150629/BMDS2601/Data/lnl_DONYoungnew_Opt.plt
Sun Dec 11 19:40:26 2016
=====
    
```

BMDS\_Model\_Run

The form of the probability function is:

$$P[\text{response}] = \text{background} + (1 - \text{background}) / [1 + \text{EXP}(-\text{intercept} - \text{slope} * \text{Log}(\text{dose}))]$$

Dependent variable = Effect  
 Independent variable = concentration

Slope parameter is not restricted

Total number of observations = 10  
 Total number of records with missing values = 0  
 Maximum number of iterations = 500  
 Relative Function Convergence has been set to: 1e-008  
 Parameter Convergence has been set to: 1e-008

User has chosen the log transformed model

Default Initial Parameter Values

background = 0  
 intercept = -2.02702  
 slope = 0.444252

Asymptotic Correlation Matrix of Parameter Estimates

( \*\*\* The model parameter(s) -background have been estimated at a boundary point, or have been specified by the user, and do not appear in the correlation matrix )

|           | intercept | slope |
|-----------|-----------|-------|
| intercept | 1         | -0.98 |
| slope     | -0.98     | 1     |

Parameter Estimates

| Interval    | Variable   | Estimate | Std. Err. | 95.0% Wald Confidence |       |
|-------------|------------|----------|-----------|-----------------------|-------|
|             |            |          |           | Lower Conf. Limit     | Upper |
| Conf. Limit | background | 0        | NA        |                       |       |
| 1.46403     | intercept  | -5.59213 | 2.10621   | -9.72024              | -     |
| 2.30083     | slope      | 1.30533  | 0.507918  | 0.309832              |       |

NA - Indicates that this parameter has hit a bound implied by some inequality constraint and thus has no standard error.

Analysis of Deviance Table

| Model         | Log(likelihood) | # Param's | Deviance | Test d.f. | P-value |
|---------------|-----------------|-----------|----------|-----------|---------|
| Full model    | -14.0193        | 10        |          |           |         |
| Fitted model  | -17.316         | 2         | 6.5934   | 8         | 0.5811  |
| Reduced model | -24.8241        | 1         | 21.6095  | 9         | 0.0102  |
| AIC:          | 38.632          |           |          |           |         |

Goodness of Fit

| Dose   | Est._Prob. | Expected | Observed | Size  | Scaled Residual |
|--------|------------|----------|----------|-------|-----------------|
| 0.1400 | 0.0003     | 0.001    | 0.000    | 4.000 | -0.034          |
| 9.0000 | 0.0616     | 0.246    | 0.000    | 4.000 | -0.512          |

|          |        |       |       |       |        |
|----------|--------|-------|-------|-------|--------|
| 19.7000  | 0.1543 | 0.617 | 1.000 | 4.000 | 0.530  |
| 33.5000  | 0.2673 | 1.069 | 1.000 | 4.000 | -0.078 |
| 43.4000  | 0.3384 | 1.354 | 1.000 | 4.000 | -0.374 |
| 44.4000  | 0.3451 | 1.380 | 2.000 | 4.000 | 0.652  |
| 97.2000  | 0.5944 | 2.377 | 1.000 | 4.000 | -1.403 |
| 124.9000 | 0.6703 | 2.681 | 4.000 | 4.000 | 1.403  |
| 227.5000 | 0.8164 | 3.266 | 3.000 | 4.000 | -0.343 |
| 0.7900   | 0.0027 | 0.008 | 0.000 | 3.000 | -0.091 |

Chi<sup>2</sup> = 5.18      d.f. = 8      P-value = 0.7386

Benchmark Dose Computation

Specified effect = 0.1  
 Risk Type = Extra risk  
 Confidence level = 0.95  
 BMD = 13.4745  
 BMDL = 2.11548

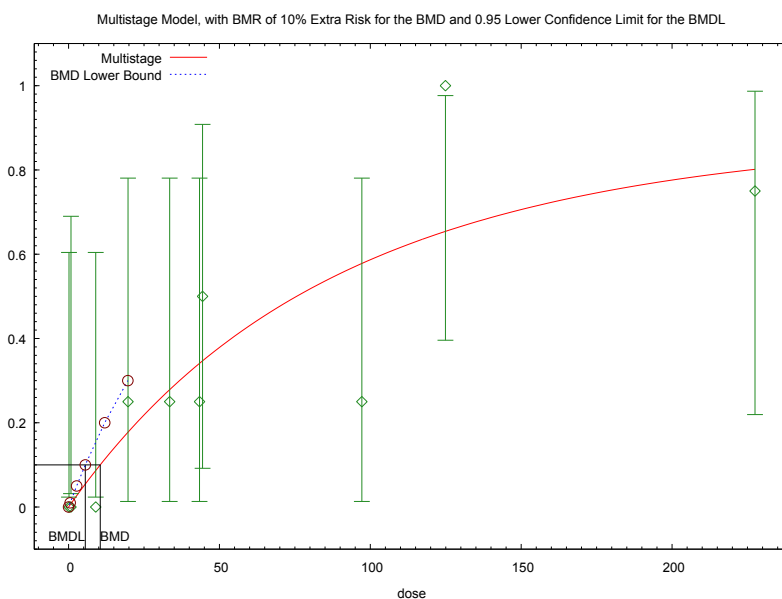

19:38 12/11 2016

```

=====
Multistage Model. (Version: 3.4; Date: 05/02/2014)
Input Data File:
C:/Users/edler/Desktop/BMDS2601_20150629/BMDS2601/Data/mst_DONYoungnew_Opt.(d)
Gnuplot Plotting File:
C:/Users/edler/Desktop/BMDS2601_20150629/BMDS2601/Data/mst_DONYoungnew_Opt.plt
Sun Dec 11 19:38:57 2016
=====
    
```

BMDS\_Model\_Run

The form of the probability function is:

$$P[\text{response}] = \text{background} + (1-\text{background}) * [1-\text{EXP}(-\text{beta1} * \text{dose}^1 - \text{beta2} * \text{dose}^2)]$$

The parameter betas are not restricted

Dependent variable = Effect  
 Independent variable = concentration

Total number of observations = 10  
 Total number of records with missing values = 0  
 Total number of parameters in model = 3  
 Total number of specified parameters = 0  
 Degree of polynomial = 2

Maximum number of iterations = 500  
 Relative Function Convergence has been set to: 1e-008  
 Parameter Convergence has been set to: 1e-008

Default Initial Parameter Values

Background = 0  
 Beta(1) = 7.96559e+017  
 Beta(2) = -3.05595e+015

Asymptotic Correlation Matrix of Parameter Estimates

( \*\*\* The model parameter(s) -Background  
 have been estimated at a boundary point, or have been specified by  
 the user,  
 and do not appear in the correlation matrix )

|         | Beta(1) | Beta(2) |
|---------|---------|---------|
| Beta(1) | 1       | -0.86   |
| Beta(2) | -0.86   | 1       |

Parameter Estimates

| Interval     | Variable   | Estimate      | Std. Err.    | 95.0% Wald Confidence |       |
|--------------|------------|---------------|--------------|-----------------------|-------|
|              |            |               |              | Lower Conf. Limit     | Upper |
| Conf. Limit  | Background | 0             | NA           |                       |       |
| 0.0195564    | Beta(1)    | 0.0101776     | 0.00478519   | 0.000798821           |       |
| 5.07281e-005 | Beta(2)    | -1.35925e-005 | 3.28172e-005 | -7.79131e-005         |       |

NA - Indicates that this parameter has hit a bound implied by some inequality constraint and thus has no standard error.

Analysis of Deviance Table

| Model         | Log(likelihood) | # Param's | Deviance | Test d.f. | P-value |
|---------------|-----------------|-----------|----------|-----------|---------|
| Full model    | -14.0193        | 10        |          |           |         |
| Fitted model  | -17.3763        | 2         | 6.71407  | 8         | 0.5678  |
| Reduced model | -24.8241        | 1         | 21.6095  | 9         | 0.0102  |
| AIC:          | 38.7526         |           |          |           |         |

Goodness of Fit

| Dose     | Est._Prob. | Expected | Observed | Size  | Scaled Residual |
|----------|------------|----------|----------|-------|-----------------|
| 0.1400   | 0.0014     | 0.006    | 0.000    | 4.000 | -0.076          |
| 9.0000   | 0.0865     | 0.346    | 0.000    | 4.000 | -0.616          |
| 19.7000  | 0.1773     | 0.709    | 1.000    | 4.000 | 0.380           |
| 33.5000  | 0.2780     | 1.112    | 1.000    | 4.000 | -0.125          |
| 43.4000  | 0.3404     | 1.362    | 1.000    | 4.000 | -0.382          |
| 44.4000  | 0.3463     | 1.385    | 2.000    | 4.000 | 0.646           |
| 97.2000  | 0.5772     | 2.309    | 1.000    | 4.000 | -1.325          |
| 124.9000 | 0.6532     | 2.613    | 4.000    | 4.000 | 1.457           |
| 227.5000 | 0.8005     | 3.202    | 3.000    | 4.000 | -0.253          |
| 0.7900   | 0.0080     | 0.024    | 0.000    | 3.000 | -0.156          |

Chi<sup>2</sup> = 5.07      d.f. = 8      P-value = 0.7496

Benchmark Dose Computation

Specified effect = 0.1  
 Risk Type = Extra risk  
 Confidence level = 0.95  
 BMD = 10.4994  
 BMDL = 5.53894  
 BMDU = 27.9637

Taken together, (5.53894, 27.9637) is a 90 % two-sided confidence interval for the BMD

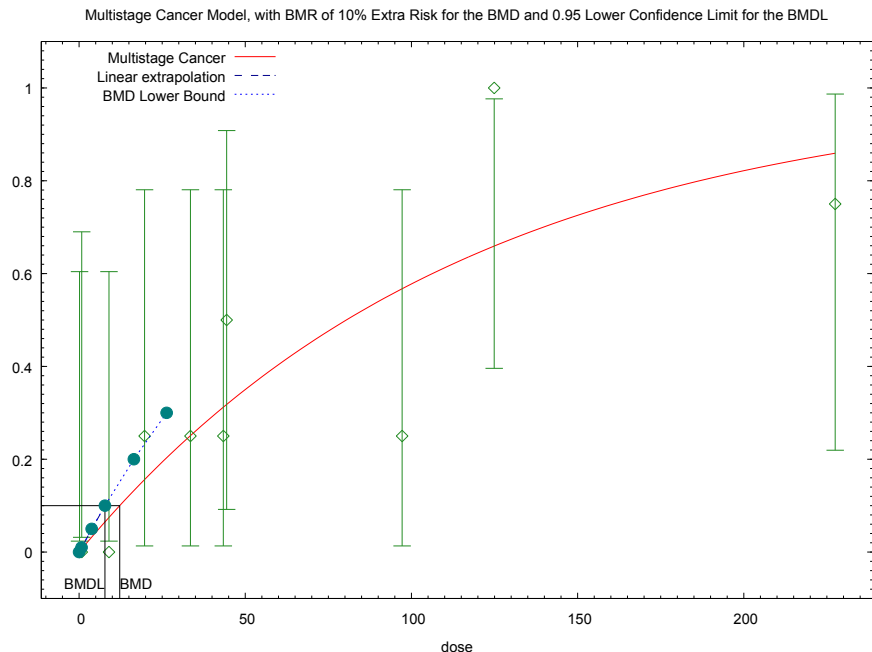

19:42 12/11 2016

```

=====
Multistage Model. (Version: 3.4; Date: 05/02/2014)
Input Data File:
C:/Users/edler/Desktop/BMDS2601_20150629/BMDS2601/Data/msc_DONYoungnew_Opt.(d)
Gnuplot Plotting File:
C:/Users/edler/Desktop/BMDS2601_20150629/BMDS2601/Data/msc_DONYoungnew_Opt.plt
Sun Dec 11 19:42:25 2016
    
```



=====

BMDS\_Model\_Run

~~~~~

The form of the probability function is:

$$P[\text{response}] = \text{background} + (1-\text{background}) * [1 - \text{EXP}(-\text{beta1} * \text{dose}^{\text{beta2}})]$$

The parameter betas are restricted to be positive

Dependent variable = Effect  
Independent variable = concentration

Total number of observations = 10  
Total number of records with missing values = 0  
Total number of parameters in model = 3  
Total number of specified parameters = 0  
Degree of polynomial = 2

Maximum number of iterations = 500  
Relative Function Convergence has been set to: 1e-008  
Parameter Convergence has been set to: 1e-008

Default Initial Parameter Values

Background = 1  
Beta(1) = 1.404e+017  
Beta(2) = 0

Asymptotic Correlation Matrix of Parameter Estimates

( \*\*\* The model parameter(s) -Background -Beta(2) have been estimated at a boundary point, or have been specified by the user, and do not appear in the correlation matrix )

Beta(1)  
Beta(1) 1

Parameter Estimates

| Interval   |            | 95.0% Wald Confidence |                   |                   |
|------------|------------|-----------------------|-------------------|-------------------|
| Variable   | Estimate   | Std. Err.             | Lower Conf. Limit | Upper Conf. Limit |
| Background | 0          | NA                    |                   |                   |
| Beta(1)    | 0.00862046 | 0.00251679            | 0.00368764        |                   |
| Beta(2)    | 0          | NA                    |                   |                   |

NA - Indicates that this parameter has hit a bound implied by some inequality constraint and thus has no standard error.

## Analysis of Deviance Table

| Model         | Log(likelihood) | # Param's | Deviance | Test d.f. | P-value |
|---------------|-----------------|-----------|----------|-----------|---------|
| Full model    | -14.0193        | 10        |          |           |         |
| Fitted model  | -17.4576        | 1         | 6.87667  | 9         | 0.65    |
| Reduced model | -24.8241        | 1         | 21.6095  | 9         | 0.0102  |

AIC: 36.9153

## Goodness of Fit

| Dose     | Est._Prob. | Expected | Observed | Size  | Scaled Residual |
|----------|------------|----------|----------|-------|-----------------|
| 0.1400   | 0.0012     | 0.005    | 0.000    | 4.000 | -0.070          |
| 9.0000   | 0.0747     | 0.299    | 0.000    | 4.000 | -0.568          |
| 19.7000  | 0.1562     | 0.625    | 1.000    | 4.000 | 0.517           |
| 33.5000  | 0.2508     | 1.003    | 1.000    | 4.000 | -0.004          |
| 43.4000  | 0.3121     | 1.248    | 1.000    | 4.000 | -0.268          |
| 44.4000  | 0.3180     | 1.272    | 2.000    | 4.000 | 0.782           |
| 97.2000  | 0.5674     | 2.270    | 1.000    | 4.000 | -1.281          |
| 124.9000 | 0.6593     | 2.637    | 4.000    | 4.000 | 1.438           |
| 227.5000 | 0.8593     | 3.437    | 3.000    | 4.000 | -0.629          |
| 0.7900   | 0.0068     | 0.020    | 0.000    | 3.000 | -0.143          |

Chi<sup>2</sup> = 5.40      d.f. = 9      P-value = 0.7980

## Benchmark Dose Computation

Specified effect = 0.1

Risk Type = Extra risk

Confidence level = 0.95

BMD = 12.2221

BMDL = 7.782

BMDU = 29.3638

Taken together, (7.782 , 29.3638) is a 90 % two-sided confidence interval for the BMD

Cancer Slope Factor = 0.0128502

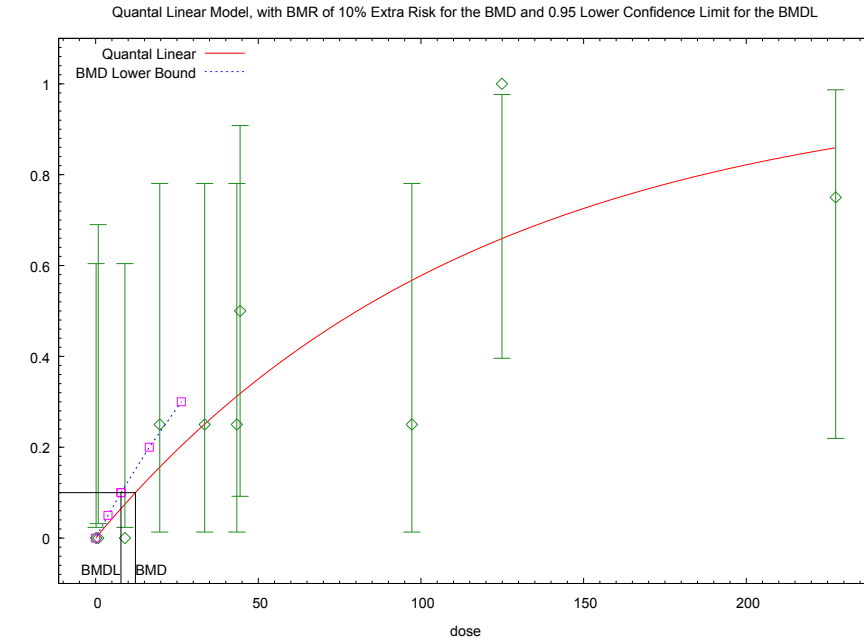

```

=====
      Quantal Linear Model using Weibull Model (Version: 2.16; Date: 2/28/2013)
      Input Data File:
C:/Users/edler/Desktop/BMDS2601_20150629/BMDS2601/Data/qln_DONYoungnew_Opt.(d)
      Gnuplot Plotting File:
C:/Users/edler/Desktop/BMDS2601_20150629/BMDS2601/Data/qln_DONYoungnew_Opt.plt
      Sun Dec 11 19:44:37 2016
=====

```

BMDS\_Model\_Run

~~~~~

The form of the probability function is:

$$P[\text{response}] = \text{background} + (1 - \text{background}) * [1 - \text{EXP}(-\text{slope} * \text{dose})]$$

Dependent variable = Effect  
 Independent variable = concentration

Total number of observations = 10  
 Total number of records with missing values = 0  
 Maximum number of iterations = 500  
 Relative Function Convergence has been set to: 1e-008  
 Parameter Convergence has been set to: 1e-008

Default Initial (and Specified) Parameter Values

Background = 0.0833333  
 Slope = 0.0044466  
 Power = 1 Specified

Asymptotic Correlation Matrix of Parameter Estimates

( \*\*\* The model parameter(s) -Background -Power  
 have been estimated at a boundary point, or have been specified by  
 the user,  
 and do not appear in the correlation matrix )

Slope  
Slope 1

Parameter Estimates

95.0% Wald Confidence

| Interval    | Variable   | Estimate   | Std. Err.  | Lower Conf. Limit | Upper |
|-------------|------------|------------|------------|-------------------|-------|
| Conf. Limit | Background | 0          | NA         |                   |       |
| 0.0135533   | Slope      | 0.00862046 | 0.00251679 | 0.00368764        |       |

NA - Indicates that this parameter has hit a bound implied by some inequality constraint and thus has no standard error.

Analysis of Deviance Table

| Model         | Log(likelihood) | # Param's | Deviance | Test d.f. | P-value |
|---------------|-----------------|-----------|----------|-----------|---------|
| Full model    | -14.0193        | 10        |          |           |         |
| Fitted model  | -17.4576        | 1         | 6.87667  | 9         | 0.65    |
| Reduced model | -24.8241        | 1         | 21.6095  | 9         | 0.0102  |

AIC: 36.9153

Goodness of Fit

| Dose     | Est._Prob. | Expected | Observed | Size  | Scaled Residual |
|----------|------------|----------|----------|-------|-----------------|
| 0.1400   | 0.0012     | 0.005    | 0.000    | 4.000 | -0.070          |
| 9.0000   | 0.0747     | 0.299    | 0.000    | 4.000 | -0.568          |
| 19.7000  | 0.1562     | 0.625    | 1.000    | 4.000 | 0.517           |
| 33.5000  | 0.2508     | 1.003    | 1.000    | 4.000 | -0.004          |
| 43.4000  | 0.3121     | 1.248    | 1.000    | 4.000 | -0.268          |
| 44.4000  | 0.3180     | 1.272    | 2.000    | 4.000 | 0.782           |
| 97.2000  | 0.5674     | 2.270    | 1.000    | 4.000 | -1.281          |
| 124.9000 | 0.6593     | 2.637    | 4.000    | 4.000 | 1.438           |
| 227.5000 | 0.8593     | 3.437    | 3.000    | 4.000 | -0.629          |
| 0.7900   | 0.0068     | 0.020    | 0.000    | 3.000 | -0.143          |

Chi<sup>2</sup> = 5.40      d.f. = 9      P-value = 0.7980

Benchmark Dose Computation

Specified effect = 0.1  
 Risk Type = Extra risk  
 Confidence level = 0.95  
 BMD = 12.2221  
 BMDL = 7.78199

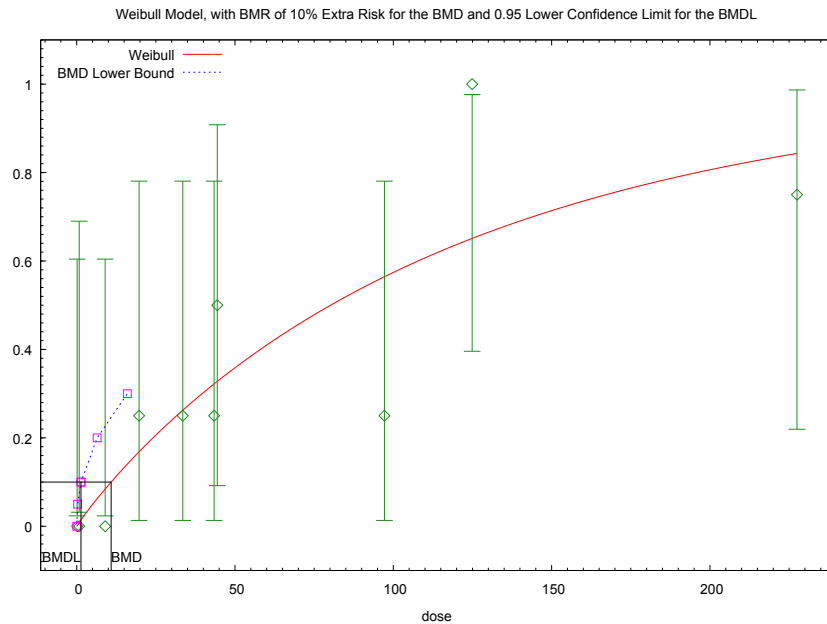

19:46 12/11 2016

```
=====
Weibull Model using Weibull Model (Version: 2.16; Date: 2/28/2013)
Input Data File:
C:/Users/edler/Desktop/BMDS2601_20150629/BMDS2601/Data/wei_DONYoungnew_Opt.(d)
Gnuplot Plotting File:
C:/Users/edler/Desktop/BMDS2601_20150629/BMDS2601/Data/wei_DONYoungnew_Opt.plt
Sun Dec 11 19:46:05 2016
=====
```

BMDS\_Model\_Run

The form of the probability function is:

$$P[\text{response}] = \text{background} + (1-\text{background}) * [1-\text{EXP}(-\text{slope} * \text{dose}^{\text{power}})]$$

Dependent variable = Effect  
 Independent variable = concentration  
 Power parameter is not restricted

Total number of observations = 10  
 Total number of records with missing values = 0  
 Maximum number of iterations = 500  
 Relative Function Convergence has been set to: 1e-008  
 Parameter Convergence has been set to: 1e-008

Default Initial (and Specified) Parameter Values

Background = 0.0833333  
 Slope = 0.0415303  
 Power = 0.588314

Asymptotic Correlation Matrix of Parameter Estimates

( \*\*\* The model parameter(s) -Background  
 have been estimated at a boundary point, or have been specified by  
 the user,  
 and do not appear in the correlation matrix )

Slope                  Power

|       |       |       |
|-------|-------|-------|
| Slope | 1     | -0.98 |
| Power | -0.98 | 1     |

Parameter Estimates

|             |            |           |                       |                   |       |
|-------------|------------|-----------|-----------------------|-------------------|-------|
|             |            |           | 95.0% Wald Confidence |                   |       |
| Interval    | Variable   | Estimate  | Std. Err.             | Lower Conf. Limit | Upper |
| Conf. Limit | Background | 0         | NA                    |                   |       |
| 0.0432303   | Slope      | 0.0111071 | 0.0163896             | -0.021016         |       |
| 1.58765     | Power      | 0.942577  | 0.329127              | 0.297501          |       |

NA - Indicates that this parameter has hit a bound implied by some inequality constraint and thus has no standard error.

Analysis of Deviance Table

|               |                 |           |          |           |         |
|---------------|-----------------|-----------|----------|-----------|---------|
| Model         | Log(likelihood) | # Param's | Deviance | Test d.f. | P-value |
| Full model    | -14.0193        | 10        |          |           |         |
| Fitted model  | -17.4427        | 2         | 6.84678  | 8         | 0.5533  |
| Reduced model | -24.8241        | 1         | 21.6095  | 9         | 0.0102  |
| AIC:          | 38.8854         |           |          |           |         |

Goodness of Fit

| Dose     | Est._Prob. | Expected | Observed | Size  | Scaled Residual |
|----------|------------|----------|----------|-------|-----------------|
| 0.1400   | 0.0017     | 0.007    | 0.000    | 4.000 | -0.083          |
| 9.0000   | 0.0843     | 0.337    | 0.000    | 4.000 | -0.607          |
| 19.7000  | 0.1684     | 0.674    | 1.000    | 4.000 | 0.436           |
| 33.5000  | 0.2622     | 1.049    | 1.000    | 4.000 | -0.056          |
| 43.4000  | 0.3217     | 1.287    | 1.000    | 4.000 | -0.307          |
| 44.4000  | 0.3274     | 1.310    | 2.000    | 4.000 | 0.736           |
| 97.2000  | 0.5640     | 2.256    | 1.000    | 4.000 | -1.266          |
| 124.9000 | 0.6506     | 2.602    | 4.000    | 4.000 | 1.466           |
| 227.5000 | 0.8428     | 3.371    | 3.000    | 4.000 | -0.510          |
| 0.7900   | 0.0089     | 0.027    | 0.000    | 3.000 | -0.164          |

Chi^2 = 5.24      d.f. = 8      P-value = 0.7313

Benchmark Dose Computation

Specified effect = 0.1  
 Risk Type = Extra risk  
 Confidence level = 0.95  
 BMD = 10.8793  
 BMDL = 1.35813

## Supplementary information WILLIAMS BMC (Williams et al., 1988)

Details of the BMD Analysis of concentration-response data for vomiting in pigs of Williams et al. (1986) trials 1 and 2 reported in Appendix G, Section G.4.1.2 of the Scientific Opinion on the risks to human and animal health related to the presence of deoxynivalenol and its acetylated and modified forms in food and feed

Filename: WilliamsBMC Folder: PigsVomiting

Output from BMDS from 11 DEC 2016 with the full information of the fit of all models of BMDS where a model fit was obtained in a reasonable duration of computing time.

The output is ordered in the sequence used in Table G12 shown in Appendix G which is based on an order of increasing mathematical complexity. The two less complex multistage models are nested under the multistage model which was used with the default assumption of the degree of the polynomial of BMDS.

Occasionally, it was not possible to obtain the results of the Gamma model with the notebook used for the calculation HP844op or Lenovo 3508.

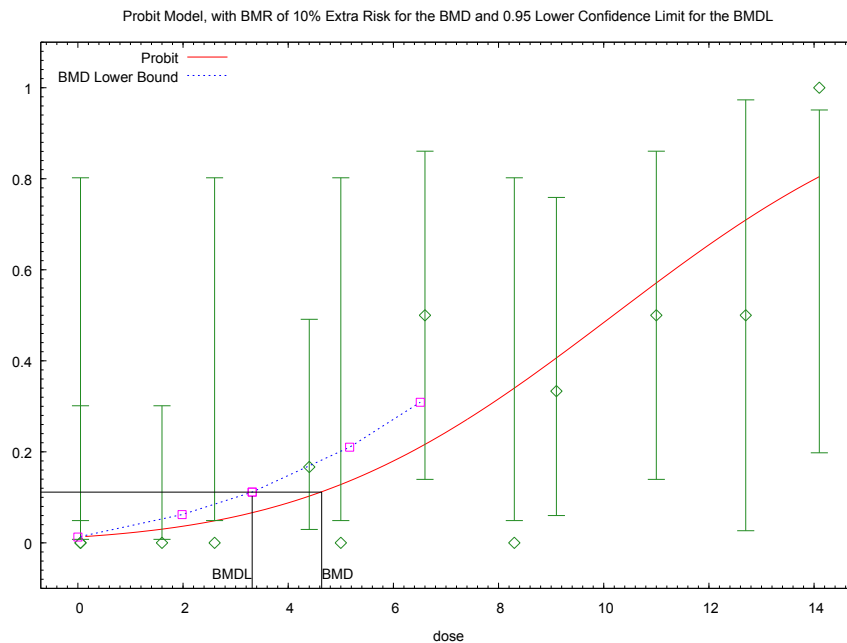

```

=====
Probit Model. (Version: 3.3; Date: 2/28/2013)
Input Data File:
C:/Users/edler/Desktop/BMDS2601_20150629/BMDS2601/Data/pro_williams_Opt.(d)
Gnuplot Plotting File:
C:/Users/edler/Desktop/BMDS2601_20150629/BMDS2601/Data/pro_williams_Opt.plt
Sun Dec 11 20:18:30 2016
=====

```

BMDS\_Model\_Run

The form of the probability function is:

$$P[\text{response}] = \text{CumNorm}(\text{Intercept} + \text{Slope} * \text{Dose}),$$

where CumNorm(.) is the cumulative normal distribution function

Dependent variable = Effect  
 Independent variable = Dose  
 Slope parameter is not restricted

Total number of observations = 12  
 Total number of records with missing values = 0  
 Maximum number of iterations = 500  
 Relative Function Convergence has been set to: 1e-008  
 Parameter Convergence has been set to: 1e-008

Default Initial (and Specified) Parameter Values  
 background = 0 Specified  
 intercept = -2.14661  
 slope = 0.209647

Asymptotic Correlation Matrix of Parameter Estimates

( \*\*\* The model parameter(s) -background  
 have been estimated at a boundary point, or have been specified by  
 the user,  
 and do not appear in the correlation matrix )

|           | intercept | slope |
|-----------|-----------|-------|
| intercept | 1         | -0.89 |
| slope     | -0.89     | 1     |

Parameter Estimates

| Interval    | Variable  | Estimate | Std. Err. | 95.0% Wald Confidence |       |
|-------------|-----------|----------|-----------|-----------------------|-------|
|             |           |          |           | Lower Conf. Limit     | Upper |
| Conf. Limit | intercept | -2.23445 | 0.465752  | -3.1473               | -     |
| 1.32159     | slope     | 0.219064 | 0.0576327 | 0.106106              |       |
| 0.332022    |           |          |           |                       |       |

Analysis of Deviance Table

| Model         | Log(likelihood) | # Param's | Deviance | Test d.f. | P-value  |
|---------------|-----------------|-----------|----------|-----------|----------|
| Full model    | -18.9299        | 12        |          |           |          |
| Fitted model  | -22.8382        | 2         | 7.81667  | 10        | 0.6467   |
| Reduced model | -32.7474        | 1         | 27.635   | 11        | 0.003681 |
| AIC:          | 49.6764         |           |          |           |          |

Goodness of Fit

| Dose   | Est._Prob. | Expected | Observed | Size   | Scaled Residual |
|--------|------------|----------|----------|--------|-----------------|
| 0.0500 | 0.0131     | 0.157    | 0.000    | 12.000 | -0.399          |
| 1.6000 | 0.0298     | 0.357    | 0.000    | 12.000 | -0.607          |
| 4.4000 | 0.1019     | 1.223    | 2.000    | 12.000 | 0.741           |
| 6.6000 | 0.2152     | 1.291    | 3.000    | 6.000  | 1.698           |
| 9.1000 | 0.4048     | 2.429    | 2.000    | 6.000  | -0.357          |



|         |        |       |       |       |        |
|---------|--------|-------|-------|-------|--------|
| 11.0000 | 0.5696 | 3.417 | 3.000 | 6.000 | -0.344 |
| 0.0500  | 0.0131 | 0.026 | 0.000 | 2.000 | -0.163 |
| 2.6000  | 0.0480 | 0.096 | 0.000 | 2.000 | -0.317 |
| 5.0000  | 0.1273 | 0.255 | 0.000 | 2.000 | -0.540 |
| 8.3000  | 0.3386 | 0.677 | 0.000 | 2.000 | -1.012 |
| 12.7000 | 0.7080 | 1.416 | 1.000 | 2.000 | -0.647 |
| 14.1000 | 0.8035 | 1.607 | 2.000 | 2.000 | 0.699  |

Chi<sup>2</sup> = 6.56      d.f. = 10      P-value = 0.7666

Benchmark Dose Computation

Specified effect = 0.1  
 Risk Type = Extra risk  
 Confidence level = 0.95  
 BMD = 4.63617  
 BMDL = 3.31477

Logistic Model, with BMR of 10% Extra Risk for the BMD and 0.95 Lower Confidence Limit for the BMDL

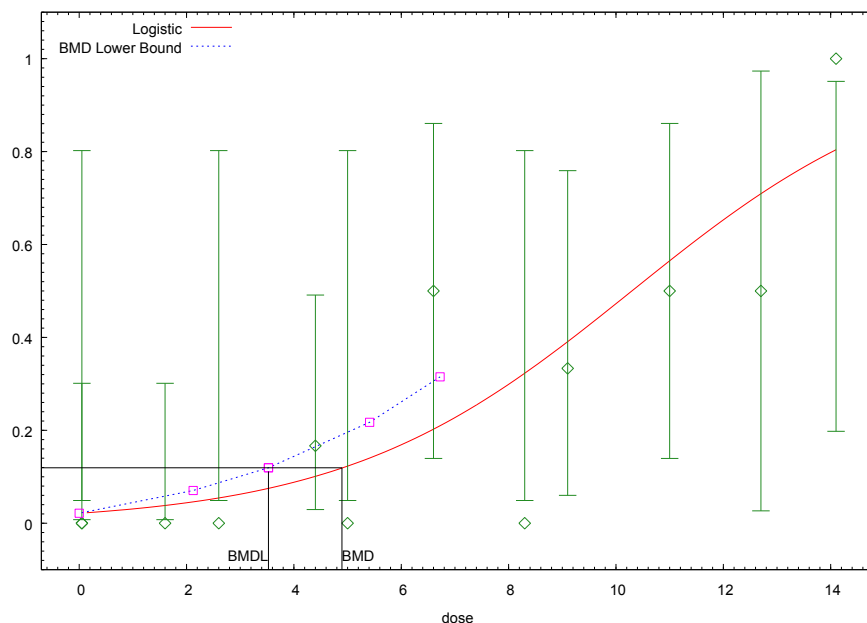

20:21 12/11 2016

```

=====
Logistic Model. (Version: 2.14; Date: 2/28/2013)
Input Data File:
C:/Users/edler/Desktop/BMDS2601_20150629/BMDS2601/Data/log_williams_Opt.(d)
Gnuplot Plotting File:
C:/Users/edler/Desktop/BMDS2601_20150629/BMDS2601/Data/log_williams_Opt.plt
Sun Dec 11 20:21:12 2016
=====
    
```

BMDS\_Model\_Run

The form of the probability function is:

$$P[\text{response}] = 1/[1+\text{EXP}(-\text{intercept}-\text{slope}*\text{dose})]$$

Dependent variable = Effect  
 Independent variable = Dose

Slope parameter is not restricted

Total number of observations = 12  
 Total number of records with missing values = 0  
 Maximum number of iterations = 500  
 Relative Function Convergence has been set to: 1e-008  
 Parameter Convergence has been set to: 1e-008

Default Initial Parameter Values  
 background = 0 Specified  
 intercept = -2.6779  
 slope = 0.249614

Asymptotic Correlation Matrix of Parameter Estimates

( \*\*\* The model parameter(s) -background  
 have been estimated at a boundary point, or have been specified by  
 the user,  
 and do not appear in the correlation matrix )

|           | intercept | slope |
|-----------|-----------|-------|
| intercept | 1         | -0.91 |
| slope     | -0.91     | 1     |

Parameter Estimates

| Interval    | Variable  | Estimate | Std. Err. | 95.0% Wald Confidence |       |
|-------------|-----------|----------|-----------|-----------------------|-------|
|             |           |          |           | Lower Conf. Limit     | Upper |
| Conf. Limit | intercept | -3.81662 | 0.884678  | -5.55056              | -     |
| 2.08269     | slope     | 0.371464 | 0.103439  | 0.168728              |       |
| 0.574201    |           |          |           |                       |       |

Analysis of Deviance Table

| Model         | Log(likelihood) | # Param's | Deviance | Test d.f. | P-value  |
|---------------|-----------------|-----------|----------|-----------|----------|
| Full model    | -18.9299        | 12        |          |           |          |
| Fitted model  | -23.1391        | 2         | 8.41841  | 10        | 0.588    |
| Reduced model | -32.7474        | 1         | 27.635   | 11        | 0.003681 |
| AIC:          | 50.2782         |           |          |           |          |

Goodness of Fit

| Dose    | Est._Prob. | Expected | Observed | Size   | Scaled Residual |
|---------|------------|----------|----------|--------|-----------------|
| 0.0500  | 0.0219     | 0.263    | 0.000    | 12.000 | -0.519          |
| 1.6000  | 0.0383     | 0.460    | 0.000    | 12.000 | -0.692          |
| 4.4000  | 0.1014     | 1.216    | 2.000    | 12.000 | 0.750           |
| 6.6000  | 0.2034     | 1.221    | 3.000    | 6.000  | 1.805           |
| 9.1000  | 0.3926     | 2.356    | 2.000    | 6.000  | -0.297          |
| 11.0000 | 0.5670     | 3.402    | 3.000    | 6.000  | -0.331          |
| 0.0500  | 0.0219     | 0.044    | 0.000    | 2.000  | -0.212          |
| 2.6000  | 0.0546     | 0.109    | 0.000    | 2.000  | -0.340          |
| 5.0000  | 0.1235     | 0.247    | 0.000    | 2.000  | -0.531          |
| 8.3000  | 0.3244     | 0.649    | 0.000    | 2.000  | -0.980          |

|         |        |       |       |       |        |
|---------|--------|-------|-------|-------|--------|
| 12.7000 | 0.7111 | 1.422 | 1.000 | 2.000 | -0.659 |
| 14.1000 | 0.8055 | 1.611 | 2.000 | 2.000 | 0.695  |

Chi<sup>2</sup> = 7.08      d.f. = 10      P-value = 0.7175

Benchmark Dose Computation

Specified effect = 0.1  
 Risk Type = Extra risk  
 Confidence level = 0.95  
 BMD = 4.89486  
 BMDL = 3.52599

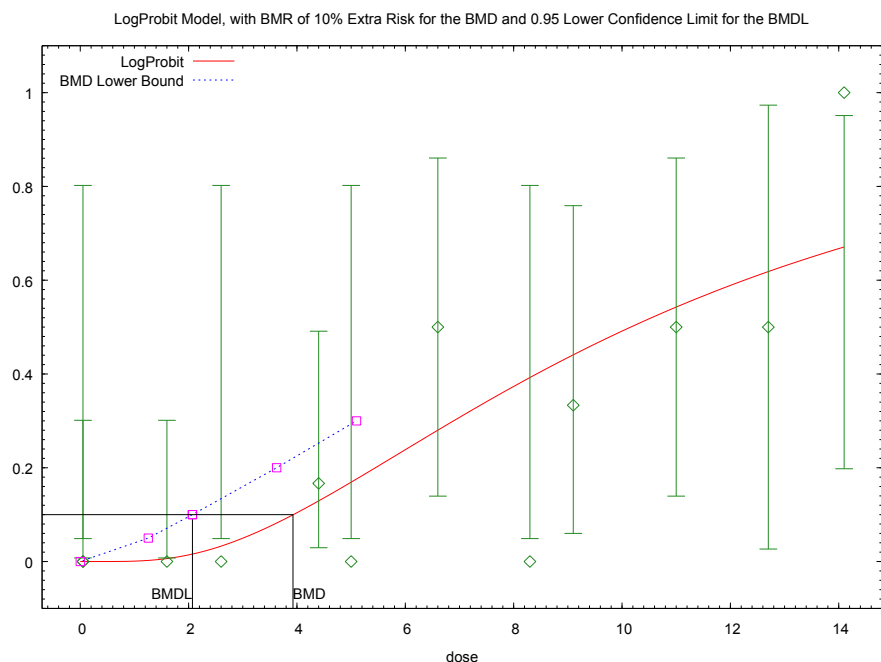

20:23 12/11 2016

```

=====
Probit Model. (Version: 3.3; Date: 2/28/2013)
Input Data File:
C:/Users/edler/Desktop/BMDS2601_20150629/BMDS2601/Data/lnp_williams_Opt.(d)
Gnuplot Plotting File:
C:/Users/edler/Desktop/BMDS2601_20150629/BMDS2601/Data/lnp_williams_Opt.plt
Sun Dec 11 20:23:39 2016
=====
  
```

BMDS\_Model\_Run

The form of the probability function is:

$$P[\text{response}] = \text{Background} + (1 - \text{Background}) * \text{CumNorm}(\text{Intercept} + \text{Slope} * \text{Log}(\text{Dose})),$$

where CumNorm(.) is the cumulative normal distribution function

Dependent variable = Effect  
 Independent variable = Dose  
 Slope parameter is not restricted

Total number of observations = 12  
 Total number of records with missing values = 0  
 Maximum number of iterations = 500  
 Relative Function Convergence has been set to: 1e-008  
 Parameter Convergence has been set to: 1e-008

User has chosen the log transformed model

Default Initial (and Specified) Parameter Values  
 background = 0  
 intercept = -1.11261  
 slope = 0.273357

Asymptotic Correlation Matrix of Parameter Estimates

( \*\*\* The model parameter(s) -background  
 have been estimated at a boundary point, or have been specified by  
 the user,  
 and do not appear in the correlation matrix )

|           | intercept | slope |
|-----------|-----------|-------|
| intercept | 1         | -0.97 |
| slope     | -0.97     | 1     |

Parameter Estimates

| Interval    | Variable   | Estimate | Std. Err. | 95.0% Wald Confidence |       |
|-------------|------------|----------|-----------|-----------------------|-------|
|             |            |          |           | Lower Conf. Limit     | Upper |
| Conf. Limit | background | 0        | NA        |                       |       |
| 1.28891     | intercept  | -3.12961 | 0.93915   | -4.97031              | -     |
| 2.25991     | slope      | 1.3512   | 0.463634  | 0.442499              |       |

NA - Indicates that this parameter has hit a bound implied by some inequality constraint and thus has no standard error.

Analysis of Deviance Table

| Model         | Log(likelihood) | # Param's | Deviance | Test d.f. | P-value  |
|---------------|-----------------|-----------|----------|-----------|----------|
| Full model    | -18.9299        | 12        |          |           |          |
| Fitted model  | -22.1758        | 2         | 6.49181  | 10        | 0.7724   |
| Reduced model | -32.7474        | 1         | 27.635   | 11        | 0.003681 |
| AIC:          | 48.3516         |           |          |           |          |

Goodness of Fit

| Dose   | Est._Prob. | Expected | Observed | Size   | Scaled Residual |
|--------|------------|----------|----------|--------|-----------------|
| 0.0500 | 0.0000     | 0.000    | 0.000    | 12.000 | -0.000          |
| 1.6000 | 0.0063     | 0.076    | 0.000    | 12.000 | -0.276          |
| 4.4000 | 0.1297     | 1.557    | 2.000    | 12.000 | 0.381           |
| 6.6000 | 0.2810     | 1.686    | 3.000    | 6.000  | 1.193           |

|         |        |       |       |       |        |
|---------|--------|-------|-------|-------|--------|
| 9.1000  | 0.4420 | 2.652 | 2.000 | 6.000 | -0.536 |
| 11.0000 | 0.5440 | 3.264 | 3.000 | 6.000 | -0.216 |
| 0.0500  | 0.0000 | 0.000 | 0.000 | 2.000 | -0.000 |
| 2.6000  | 0.0330 | 0.066 | 0.000 | 2.000 | -0.261 |
| 5.0000  | 0.1698 | 0.340 | 0.000 | 2.000 | -0.640 |
| 8.3000  | 0.3935 | 0.787 | 0.000 | 2.000 | -1.139 |
| 12.7000 | 0.6197 | 1.239 | 1.000 | 2.000 | -0.349 |
| 14.1000 | 0.6722 | 1.344 | 2.000 | 2.000 | 0.988  |

Chi<sup>2</sup> = 4.85      d.f. = 10      P-value = 0.9009

Benchmark Dose Computation

Specified effect = 0.1  
 Risk Type = Extra risk  
 Confidence level = 0.95  
 BMD = 3.92637  
 BMDL = 2.07069

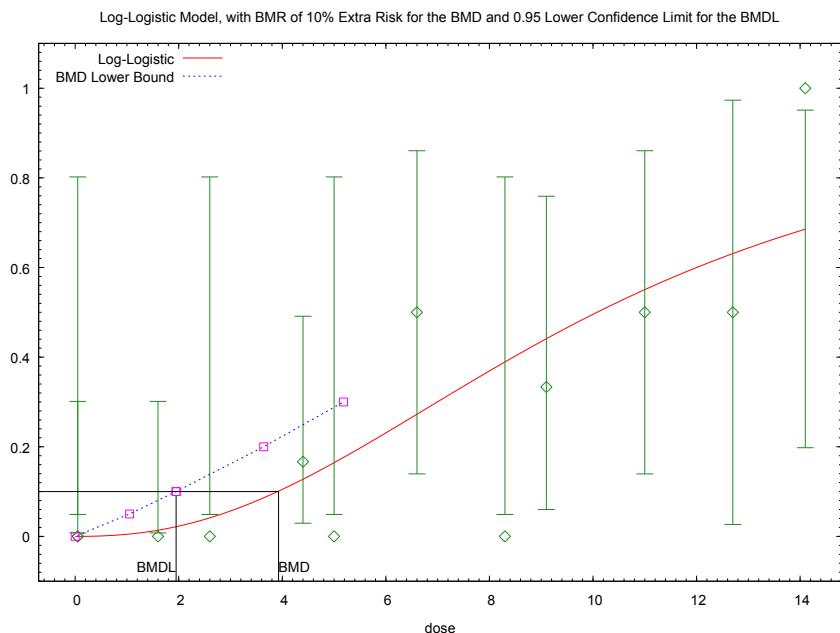

20:25 12/11 2016

```
=====
Logistic Model. (Version: 2.14; Date: 2/28/2013)
Input Data File:
C:/Users/edler/Desktop/BMDS2601_20150629/BMDS2601/Data/lnl_williams_Opt.(d)
Gnuplot Plotting File:
C:/Users/edler/Desktop/BMDS2601_20150629/BMDS2601/Data/lnl_williams_Opt.plt
Sun Dec 11 20:25:16 2016
=====
```

BMDS\_Model\_Run

The form of the probability function is:

$$P[\text{response}] = \text{background} + (1 - \text{background}) / [1 + \text{EXP}(-\text{intercept} - \text{slope} * \text{Log}(\text{dose}))]$$

Dependent variable = Effect  
 Independent variable = Dose

Slope parameter is not restricted

Total number of observations = 12  
 Total number of records with missing values = 0  
 Maximum number of iterations = 500  
 Relative Function Convergence has been set to: 1e-008  
 Parameter Convergence has been set to: 1e-008

User has chosen the log transformed model

Default Initial Parameter Values

background = 0  
 intercept = -1.59731  
 slope = 0.454382

Asymptotic Correlation Matrix of Parameter Estimates

( \*\*\* The model parameter(s) -background  
 have been estimated at a boundary point, or have been specified by  
 the user,  
 and do not appear in the correlation matrix )

|           | intercept | slope |
|-----------|-----------|-------|
| intercept | 1         | -0.98 |
| slope     | -0.98     | 1     |

Parameter Estimates

| Interval    | Variable   | Estimate | Std. Err. | 95.0% Wald Confidence |       |
|-------------|------------|----------|-----------|-----------------------|-------|
|             |            |          |           | Lower Conf. Limit     | Upper |
| Conf. Limit | background | 0        | NA        |                       |       |
| 2.03048     | intercept  | -5.36433 | 1.70098   | -8.69819              | -     |
| 3.91732     | slope      | 2.31515  | 0.817445  | 0.712991              |       |

NA - Indicates that this parameter has hit a bound implied by some inequality constraint and thus has no standard error.

Analysis of Deviance Table

| Model         | Log(likelihood) | # Param's | Deviance | Test d.f. | P-value  |
|---------------|-----------------|-----------|----------|-----------|----------|
| Full model    | -18.9299        | 12        |          |           |          |
| Fitted model  | -22.3001        | 2         | 6.74039  | 10        | 0.7497   |
| Reduced model | -32.7474        | 1         | 27.635   | 11        | 0.003681 |
| AIC:          | 48.6001         |           |          |           |          |

Goodness of Fit

| Dose   | Est._Prob. | Expected | Observed | Size   | Scaled Residual |
|--------|------------|----------|----------|--------|-----------------|
| 0.0500 | 0.0000     | 0.000    | 0.000    | 12.000 | -0.007          |
| 1.6000 | 0.0137     | 0.164    | 0.000    | 12.000 | -0.408          |

|         |        |       |       |        |        |
|---------|--------|-------|-------|--------|--------|
| 4.4000  | 0.1263 | 1.515 | 2.000 | 12.000 | 0.421  |
| 6.6000  | 0.2698 | 1.619 | 3.000 | 6.000  | 1.270  |
| 9.1000  | 0.4374 | 2.624 | 2.000 | 6.000  | -0.514 |
| 11.0000 | 0.5467 | 3.280 | 3.000 | 6.000  | -0.230 |
| 0.0500  | 0.0000 | 0.000 | 0.000 | 2.000  | -0.003 |
| 2.6000  | 0.0410 | 0.082 | 0.000 | 2.000  | -0.292 |
| 5.0000  | 0.1627 | 0.325 | 0.000 | 2.000  | -0.623 |
| 8.3000  | 0.3858 | 0.772 | 0.000 | 2.000  | -1.121 |
| 12.7000 | 0.6271 | 1.254 | 1.000 | 2.000  | -0.372 |
| 14.1000 | 0.6818 | 1.364 | 2.000 | 2.000  | 0.966  |

Chi<sup>2</sup> = 5.08      d.f. = 10      P-value = 0.8860

Benchmark Dose Computation

Specified effect = 0.1  
 Risk Type = Extra risk  
 Confidence level = 0.95  
 BMD = 3.92745  
 BMDL = 1.94923

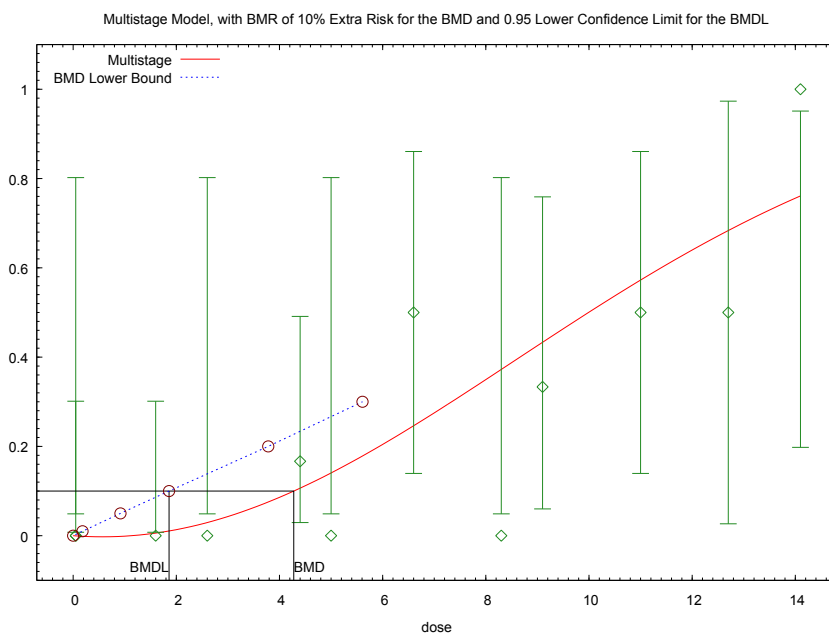

20:27 12/11 2016

```

=====
Multistage Model. (Version: 3.4; Date: 05/02/2014)
Input Data File:
C:/Users/edler/Desktop/BMDS2601_20150629/BMDS2601/Data/mst_williams_Opt.(d)
Gnuplot Plotting File:
C:/Users/edler/Desktop/BMDS2601_20150629/BMDS2601/Data/mst_williams_Opt.plt
Sun Dec 11 20:27:50 2016
=====
    
```

BMDS\_Model\_Run

The form of the probability function is:

$$P[\text{response}] = \text{background} + (1-\text{background}) * [1-\text{EXP}(-\text{beta1} * \text{dose}^{1-\text{beta2}} * \text{dose}^2)]$$

The parameter betas are not restricted

Dependent variable = Effect  
Independent variable = Dose

Total number of observations = 12  
Total number of records with missing values = 0  
Total number of parameters in model = 3  
Total number of specified parameters = 0  
Degree of polynomial = 2

Maximum number of iterations = 500  
Relative Function Convergence has been set to: 1e-008  
Parameter Convergence has been set to: 1e-008

Default Initial Parameter Values

Background = 1  
Beta(1) = -7.78141e+018  
Beta(2) = 8.05238e+017

Asymptotic Correlation Matrix of Parameter Estimates

( \*\*\* The model parameter(s) -Background have been estimated at a boundary point, or have been specified by the user, and do not appear in the correlation matrix )

|         | Beta(1) | Beta(2) |
|---------|---------|---------|
| Beta(1) | 1       | -0.93   |
| Beta(2) | -0.93   | 1       |

Parameter Estimates

| Interval    | Variable   | Estimate    | Std. Err.  | 95.0% Wald Confidence |       |
|-------------|------------|-------------|------------|-----------------------|-------|
|             |            |             |            | Lower Conf. Limit     | Upper |
| Conf. Limit | Background | 0           | NA         |                       |       |
| 0.0584069   | Beta(1)    | -0.00886195 | 0.0343215  | -0.0761308            |       |
| 0.0176364   | Beta(2)    | 0.00783137  | 0.00500266 | -0.00197366           |       |

NA - Indicates that this parameter has hit a bound implied by some inequality constraint and thus has no standard error.

Analysis of Deviance Table

| Model         | Log(likelihood) | # Param's | Deviance | Test d.f. | P-value  |
|---------------|-----------------|-----------|----------|-----------|----------|
| Full model    | -18.9299        | 12        |          |           |          |
| Fitted model  | -22.261         | 2         | 6.66215  | 10        | 0.7569   |
| Reduced model | -32.7474        | 1         | 27.635   | 11        | 0.003681 |
| AIC:          | 48.5219         |           |          |           |          |



Goodness of Fit

| Dose    | Est._Prob. | Expected | Observed | Size   | Scaled Residual |
|---------|------------|----------|----------|--------|-----------------|
| 0.0500  | -0.0004    | -0.005   | 0.000    | 12.000 | 0.005           |
| 1.6000  | 0.0059     | 0.070    | 0.000    | 12.000 | -0.266          |
| 4.4000  | 0.1065     | 1.278    | 2.000    | 12.000 | 0.675           |
| 6.6000  | 0.2462     | 1.477    | 3.000    | 6.000  | 1.443           |
| 9.1000  | 0.4333     | 2.600    | 2.000    | 6.000  | -0.494          |
| 11.0000 | 0.5726     | 3.436    | 3.000    | 6.000  | -0.360          |
| 0.0500  | -0.0004    | -0.001   | 0.000    | 2.000  | 0.001           |
| 2.6000  | 0.0295     | 0.059    | 0.000    | 2.000  | -0.246          |
| 5.0000  | 0.1406     | 0.281    | 0.000    | 2.000  | -0.572          |
| 8.3000  | 0.3725     | 0.745    | 0.000    | 2.000  | -1.090          |
| 12.7000 | 0.6835     | 1.367    | 1.000    | 2.000  | -0.558          |
| 14.1000 | 0.7612     | 1.522    | 2.000    | 2.000  | 0.792           |

Chi<sup>2</sup> = 5.50      d.f. = 10      P-value = 0.8557

Benchmark Dose Computation

Specified effect = 0.1  
 Risk Type = Extra risk  
 Confidence level = 0.95  
 BMD = 4.2771  
 BMDL = 1.85926  
 BMDU = 5.85534

Taken together, (1.85926, 5.85534) is a 90 % two-sided confidence interval for the BMD

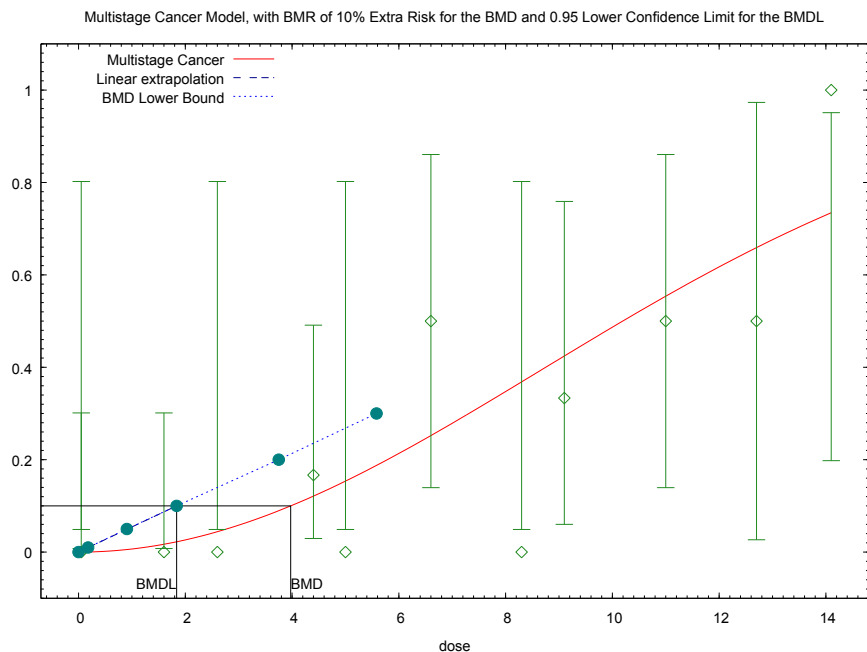

20:29 12/11 2016

=====  
 Multistage Model. (Version: 3.4; Date: 05/02/2014)  
 Input Data File:  
 C:/Users/edler/Desktop/BMDS2601\_20150629/BMDS2601/Data/msc\_williams\_Opt.(d)

Gnuplot Plotting File:  
 C:/Users/edler/Desktop/BMDS2601\_20150629/BMDS2601/Data/msc\_williams\_Opt.plt  
 Sun Dec 11 20:29:44 2016

=====

BMDS\_Model\_Run

~~~~~

The form of the probability function is:

$$P[\text{response}] = \text{background} + (1-\text{background}) * [1 - \text{EXP}(-\text{beta1} * \text{dose}^{\text{beta2}})]$$

The parameter betas are restricted to be positive

Dependent variable = Effect  
 Independent variable = Dose

Total number of observations = 12  
 Total number of records with missing values = 0  
 Total number of parameters in model = 3  
 Total number of specified parameters = 0  
 Degree of polynomial = 2

Maximum number of iterations = 500  
 Relative Function Convergence has been set to: 1e-008  
 Parameter Convergence has been set to: 1e-008

Default Initial Parameter Values

Background = 0  
 Beta(1) = 0  
 Beta(2) = 2.74191e+017

Asymptotic Correlation Matrix of Parameter Estimates

( \*\*\* The model parameter(s) -Background -Beta(1)  
 have been estimated at a boundary point, or have been specified by  
 the user,  
 and do not appear in the correlation matrix )

Beta(2)

Beta(2) 1

Parameter Estimates

|             |            | 95.0% Wald Confidence |            |                   |       |
|-------------|------------|-----------------------|------------|-------------------|-------|
| Interval    | Variable   | Estimate              | Std. Err.  | Lower Conf. Limit | Upper |
| Conf. Limit | Background | 0                     | NA         |                   |       |
|             | Beta(1)    | 0                     | NA         |                   |       |
|             | Beta(2)    | 0.00667323            | 0.00189447 | 0.00296013        |       |
|             |            | 0.0103863             |            |                   |       |

NA - Indicates that this parameter has hit a bound implied by some inequality constraint and thus has no standard error.

Analysis of Deviance Table

| Model         | Log(likelihood) | # Param's | Deviance | Test d.f. | P-value  |
|---------------|-----------------|-----------|----------|-----------|----------|
| Full model    | -18.9299        | 12        |          |           |          |
| Fitted model  | -22.2931        | 1         | 6.72636  | 11        | 0.8208   |
| Reduced model | -32.7474        | 1         | 27.635   | 11        | 0.003681 |

AIC: 46.5861

Goodness of Fit

| Dose    | Est._Prob. | Expected | Observed | Size   | Scaled Residual |
|---------|------------|----------|----------|--------|-----------------|
| 0.0500  | 0.0000     | 0.000    | 0.000    | 12.000 | -0.014          |
| 1.6000  | 0.0169     | 0.203    | 0.000    | 12.000 | -0.455          |
| 4.4000  | 0.1212     | 1.454    | 2.000    | 12.000 | 0.483           |
| 6.6000  | 0.2522     | 1.513    | 3.000    | 6.000  | 1.397           |
| 9.1000  | 0.4246     | 2.547    | 2.000    | 6.000  | -0.452          |
| 11.0000 | 0.5540     | 3.324    | 3.000    | 6.000  | -0.266          |
| 0.0500  | 0.0000     | 0.000    | 0.000    | 2.000  | -0.006          |
| 2.6000  | 0.0441     | 0.088    | 0.000    | 2.000  | -0.304          |
| 5.0000  | 0.1537     | 0.307    | 0.000    | 2.000  | -0.603          |
| 8.3000  | 0.3685     | 0.737    | 0.000    | 2.000  | -1.080          |
| 12.7000 | 0.6592     | 1.318    | 1.000    | 2.000  | -0.475          |
| 14.1000 | 0.7346     | 1.469    | 2.000    | 2.000  | 0.850           |

Chi<sup>2</sup> = 5.24      d.f. = 11      P-value = 0.9191

Benchmark Dose Computation

Specified effect = 0.1

Risk Type = Extra risk

Confidence level = 0.95

BMD = 3.97348

BMDL = 1.83708

BMDU = 5.1094

Taken together, (1.83708, 5.1094 ) is a 90 % two-sided confidence interval for the BMD

Cancer Slope Factor = 0.0544342

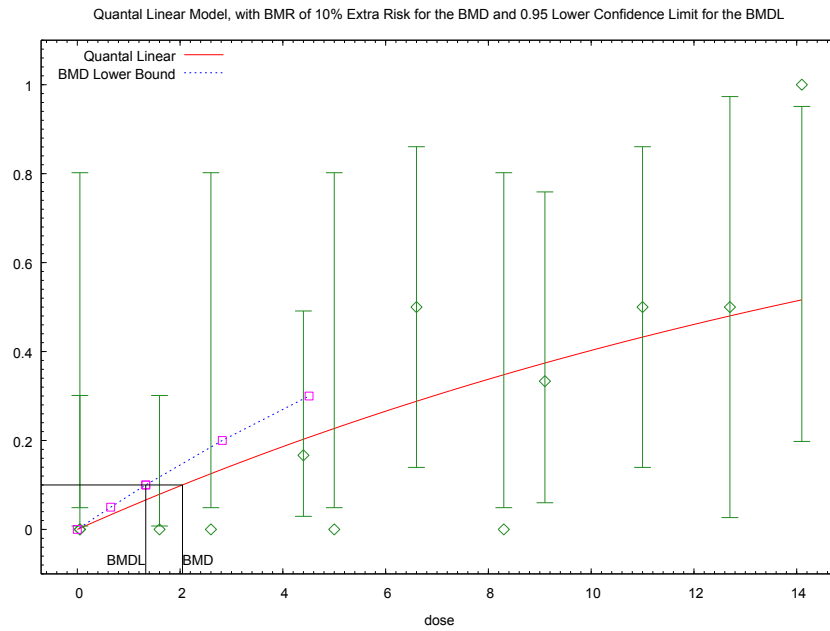

20:30 12/11 2016

```

=====
Quantal Linear Model using Weibull Model (Version: 2.16; Date: 2/28/2013)
Input Data File:
C:/Users/edler/Desktop/BMDS2601_20150629/BMDS2601/Data/qln_williams_Opt.(d)
Gnuplot Plotting File:
C:/Users/edler/Desktop/BMDS2601_20150629/BMDS2601/Data/qln_williams_Opt.plt
Sun Dec 11 20:30:59 2016
=====

```

BMDS\_Model\_Run

The form of the probability function is:

$$P[\text{response}] = \text{background} + (1-\text{background}) * [1-\text{EXP}(-\text{slope} * \text{dose})]$$

Dependent variable = Effect  
Independent variable = Dose

Total number of observations = 12  
Total number of records with missing values = 0  
Maximum number of iterations = 500  
Relative Function Convergence has been set to: 1e-008  
Parameter Convergence has been set to: 1e-008

```

Default Initial (and Specified) Parameter Values
Background =      0.125
Slope =         0.0888484
Power =          1   Specified

```

Asymptotic Correlation Matrix of Parameter Estimates

( \*\*\* The model parameter(s) -Background -Power  
have been estimated at a boundary point, or have been specified by  
the user,  
and do not appear in the correlation matrix )  
Slope

Slope 1

Parameter Estimates

95.0% Wald Confidence

| Interval  | Variable   | Estimate  | Std. Err. | Lower Conf. Limit | Upper Conf. Limit |
|-----------|------------|-----------|-----------|-------------------|-------------------|
|           | Background | 0         | NA        |                   |                   |
|           | Slope      | 0.0514667 | 0.0144263 | 0.0231916         |                   |
| 0.0797417 |            |           |           |                   |                   |

NA - Indicates that this parameter has hit a bound implied by some inequality constraint and thus has no standard error.

Analysis of Deviance Table

| Model         | Log(likelihood) | # Param's | Deviance | Test d.f. | P-value  |
|---------------|-----------------|-----------|----------|-----------|----------|
| Full model    | -18.9299        | 12        |          |           |          |
| Fitted model  | -23.6376        | 1         | 9.4154   | 11        | 0.5836   |
| Reduced model | -32.7474        | 1         | 27.635   | 11        | 0.003681 |
| AIC:          | 49.2752         |           |          |           |          |

Goodness of Fit

| Dose    | Est._Prob. | Expected | Observed | Size   | Scaled Residual |
|---------|------------|----------|----------|--------|-----------------|
| 0.0500  | 0.0026     | 0.031    | 0.000    | 12.000 | -0.176          |
| 1.6000  | 0.0790     | 0.949    | 0.000    | 12.000 | -1.015          |
| 4.4000  | 0.2026     | 2.432    | 2.000    | 12.000 | -0.310          |
| 6.6000  | 0.2880     | 1.728    | 3.000    | 6.000  | 1.147           |
| 9.1000  | 0.3740     | 2.244    | 2.000    | 6.000  | -0.206          |
| 11.0000 | 0.4323     | 2.594    | 3.000    | 6.000  | 0.335           |
| 0.0500  | 0.0026     | 0.005    | 0.000    | 2.000  | -0.072          |
| 2.6000  | 0.1252     | 0.250    | 0.000    | 2.000  | -0.535          |
| 5.0000  | 0.2269     | 0.454    | 0.000    | 2.000  | -0.766          |
| 8.3000  | 0.3476     | 0.695    | 0.000    | 2.000  | -1.032          |
| 12.7000 | 0.4798     | 0.960    | 1.000    | 2.000  | 0.057           |
| 14.1000 | 0.5160     | 1.032    | 2.000    | 2.000  | 1.370           |

Chi^2 = 6.45      d.f. = 11      P-value = 0.8417

Benchmark Dose Computation

Specified effect = 0.1  
 Risk Type = Extra risk  
 Confidence level = 0.95  
 BMD = 2.04716  
 BMDL = 1.33219

Output of Weibull model not shown.

Weibull Model, with BMR of 10% Extra Risk for the BMD and 0.95 Lower Confidence Limit for the BMDL

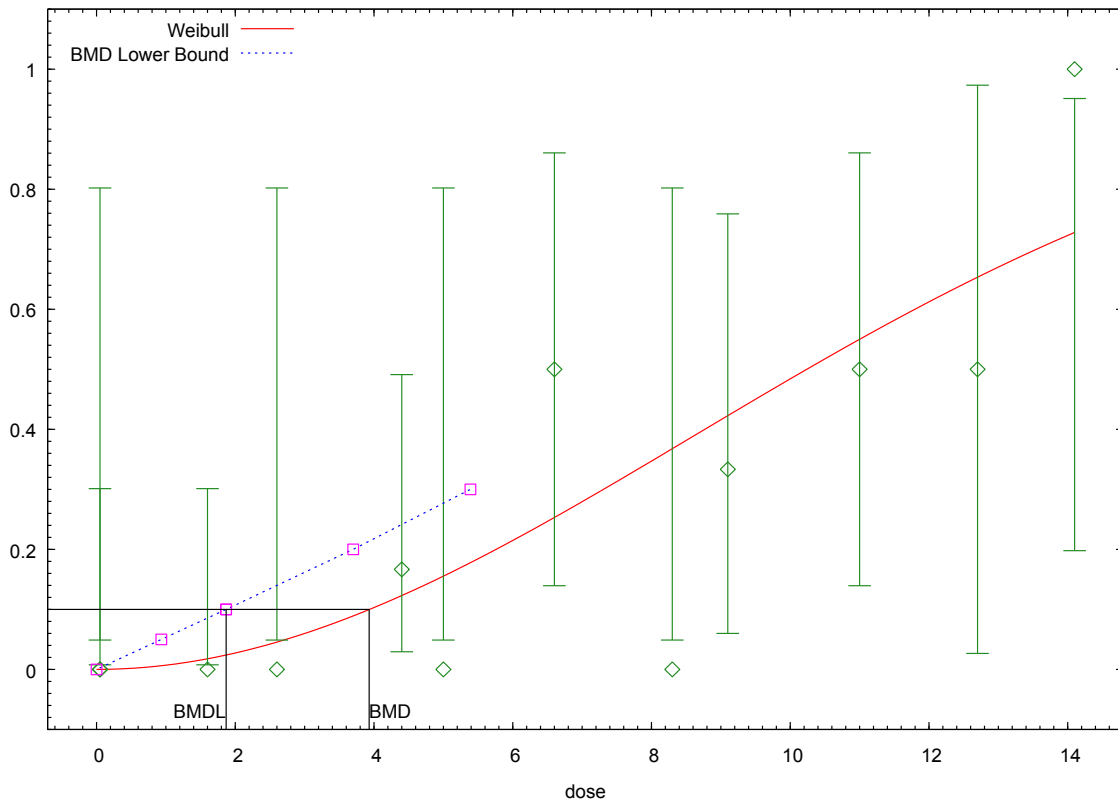

09:25 06/28 2017

```

=====
      Weibull Model using Weibull Model (Version: 2.16; Date: 2/28/2013)
      Input Data File:
C:/Users/edler/Desktop/BMDS2601_20150629/BMDS2601/Data/wei_williams_Opt.(d)
      Gnuplot Plotting File:
C:/Users/edler/Desktop/BMDS2601_20150629/BMDS2601/Data/wei_williams_Opt.plt
                                          Wed Jun 28 09:25:29 2017
=====
    
```

BMDS\_Model\_Run

The form of the probability function is:

$$P[\text{response}] = \text{background} + (1-\text{background}) * [1-\text{EXP}(-\text{slope} * \text{dose}^{\text{power}})]$$

Dependent variable = Effect  
 Independent variable = Dose  
 Power parameter is not restricted

Total number of observations = 12  
 Total number of records with missing values = 0  
 Maximum number of iterations = 500  
 Relative Function Convergence has been set to: 1e-008  
 Parameter Convergence has been set to: 1e-008

```

Default Initial (and Specified) Parameter Values
Background =      0.125
Slope =         0.0460466
Power =         1.24839
    
```

Asymptotic Correlation Matrix of Parameter Estimates

( \*\*\* The model parameter(s) -Background have been estimated at a boundary point, or have been specified by the user, and do not appear in the correlation matrix )

|       | Slope | Power |
|-------|-------|-------|
| Slope | 1     | -0.98 |
| Power | -0.98 | 1     |

Parameter Estimates

|             |            | 95.0% Wald Confidence |           |                   |       |
|-------------|------------|-----------------------|-----------|-------------------|-------|
| Interval    | Variable   | Estimate              | Std. Err. | Lower Conf. Limit | Upper |
| Conf. Limit | Background | 0                     | NA        |                   |       |
| 0.0275626   | Slope      | 0.00708737            | 0.0104468 | -0.0133879        |       |
| 3.29451     | Power      | 1.97194               | 0.674791  | 0.649375          |       |

NA - Indicates that this parameter has hit a bound implied by some inequality constraint and thus has no standard error.

Analysis of Deviance Table

| Model         | Log(likelihood) | # Param's | Deviance | Test d.f. | P-value  |
|---------------|-----------------|-----------|----------|-----------|----------|
| Full model    | -18.9299        | 12        |          |           |          |
| Fitted model  | -22.2922        | 2         | 6.72465  | 10        | 0.7512   |
| Reduced model | -32.7474        | 1         | 27.635   | 11        | 0.003681 |

AIC: 48.5844

Goodness of Fit

| Dose    | Est._Prob. | Expected | Observed | Size   | Scaled Residual |
|---------|------------|----------|----------|--------|-----------------|
| 0.0500  | 0.0000     | 0.000    | 0.000    | 12.000 | -0.015          |
| 1.6000  | 0.0177     | 0.213    | 0.000    | 12.000 | -0.466          |
| 4.4000  | 0.1233     | 1.480    | 2.000    | 12.000 | 0.457           |
| 6.6000  | 0.2538     | 1.523    | 3.000    | 6.000  | 1.386           |
| 9.1000  | 0.4240     | 2.544    | 2.000    | 6.000  | -0.449          |
| 11.0000 | 0.5515     | 3.309    | 3.000    | 6.000  | -0.253          |
| 0.0500  | 0.0000     | 0.000    | 0.000    | 2.000  | -0.006          |
| 2.6000  | 0.0456     | 0.091    | 0.000    | 2.000  | -0.309          |
| 5.0000  | 0.1558     | 0.312    | 0.000    | 2.000  | -0.608          |
| 8.3000  | 0.3688     | 0.738    | 0.000    | 2.000  | -1.081          |
| 12.7000 | 0.6551     | 1.310    | 1.000    | 2.000  | -0.461          |
| 14.1000 | 0.7297     | 1.459    | 2.000    | 2.000  | 0.861           |

Chi^2 = 5.20      d.f. = 10      P-value = 0.8775

Benchmark Dose Computation

Specified effect = 0.1

Risk Type = Extra risk  
Confidence level = 0.95  
BMD = 3.9304  
BMDL = 1.86814



## Supplementary information for DOGSVOMIT (Hughes et al., 1999)

Details of the BMD Analysis of concentration-response data for vomiting in dogs of Hughes et al. (1999) reported in Appendix G, Section G.4.2.1 of the Scientific Opinion on the risks to human and animal health related to the presence of deoxynivalenol and its acetylated and modified forms in food and feed

Filename: DogsVomiting Folder: HughesVomiting

Output from BMDS from 19 Oct 2016 with the full information of the fit of all models of BMDS where a model fit was obtained in a reasonable duration of computing time.

The output is ordered in the sequence used in the Table G14 shown in Appendix G which is based on an order of increasing mathematical complexity. The two less complex multistage models are nested under the multistage model which was used with the default assumption of the degree of the polynomial of BMDS.

Occasionally, it was not possible to obtain graphic of the Gamma model with the notebook used for the calculation HP8440p or Lenovo 3508.

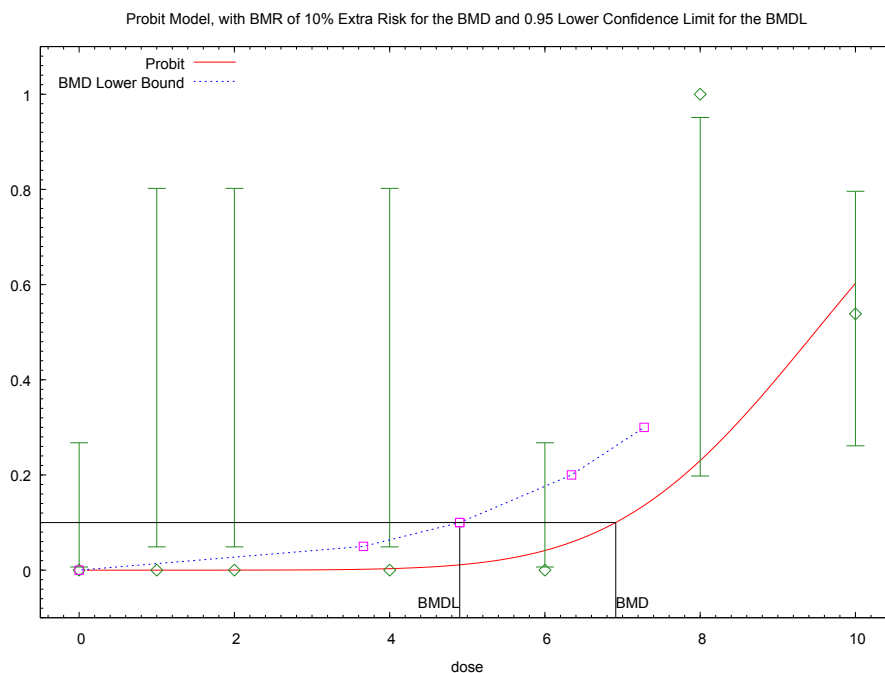

19:25 10/19 2016

```

=====
Probit Model. (Version: 3.3; Date: 2/28/2013)
Input Data File:
C:/Users/edler/Desktop/BMDS2601_20150629/BMDS2601/Data/pro_Hugehsvomit_Opt.(d)
Gnuplot Plotting File:
C:/Users/edler/Desktop/BMDS2601_20150629/BMDS2601/Data/pro_Hugehsvomit_Opt.plt
Wed Oct 19 19:25:22 2016
=====

```

BMDS\_Model\_Run

The form of the probability function is:

$$P[\text{response}] = \text{CumNorm}(\text{Intercept} + \text{Slope} * \text{Dose}),$$

where CumNorm(.) is the cumulative normal distribution function

Dependent variable = Effect  
 Independent variable = Dose  
 Slope parameter is not restricted

Total number of observations = 7  
 Total number of records with missing values = 0  
 Maximum number of iterations = 500  
 Relative Function Convergence has been set to: 1e-008  
 Parameter Convergence has been set to: 1e-008

Default Initial (and Specified) Parameter Values

background = 0 Specified  
 intercept = -2.44048  
 slope = 0.212598

Asymptotic Correlation Matrix of Parameter Estimates

( \*\*\* The model parameter(s) -background  
 have been estimated at a boundary point, or have been specified by  
 the user,  
 and do not appear in the correlation matrix )

|           | intercept | slope |
|-----------|-----------|-------|
| intercept | 1         | -0.98 |
| slope     | -0.98     | 1     |

Parameter Estimates

| Interval    | Variable  | Estimate | Std. Err. | 95.0% Wald Confidence |       |
|-------------|-----------|----------|-----------|-----------------------|-------|
|             |           |          |           | Lower Conf. Limit     | Upper |
| Conf. Limit | intercept | -4.72924 | 1.59684   | -7.85898              | -     |
| 1.59949     | slope     | 0.498785 | 0.175706  | 0.154408              |       |
| 0.843161    |           |          |           |                       |       |

Analysis of Deviance Table

| Model         | Log(likelihood) | # Param's | Deviance | Test d.f. | P-value |
|---------------|-----------------|-----------|----------|-----------|---------|
| Full model    | -8.97241        | 7         |          |           |         |
| Fitted model  | -12.6161        | 2         | 7.28735  | 5         | 0.2001  |
| Reduced model | -23.369         | 1         | 28.7932  | 6         | <.0001  |
| AIC:          | 29.2322         |           |          |           |         |

Goodness of Fit

| Dose   | Est._Prob. | Expected | Observed | Size   | Scaled Residual |
|--------|------------|----------|----------|--------|-----------------|
| 0.0000 | 0.0000     | 0.000    | 0.000    | 14.000 | -0.004          |
| 1.0000 | 0.0000     | 0.000    | 0.000    | 2.000  | -0.005          |
| 2.0000 | 0.0001     | 0.000    | 0.000    | 2.000  | -0.014          |
| 4.0000 | 0.0031     | 0.006    | 0.000    | 2.000  | -0.079          |
| 6.0000 | 0.0412     | 0.577    | 0.000    | 14.000 | -0.776          |
| 8.0000 | 0.2300     | 0.460    | 2.000    | 2.000  | 2.588           |

10.0000      0.6020            7.826      7.000      13.000            -0.468  
 Chi<sup>2</sup> = 7.52            d.f. = 5            P-value = 0.1844

Benchmark Dose Computation

Specified effect =            0.1  
 Risk Type            =            Extra risk  
 Confidence level =            0.95  
  
                           BMD =            6.91218  
                           BMDL =           4.90252

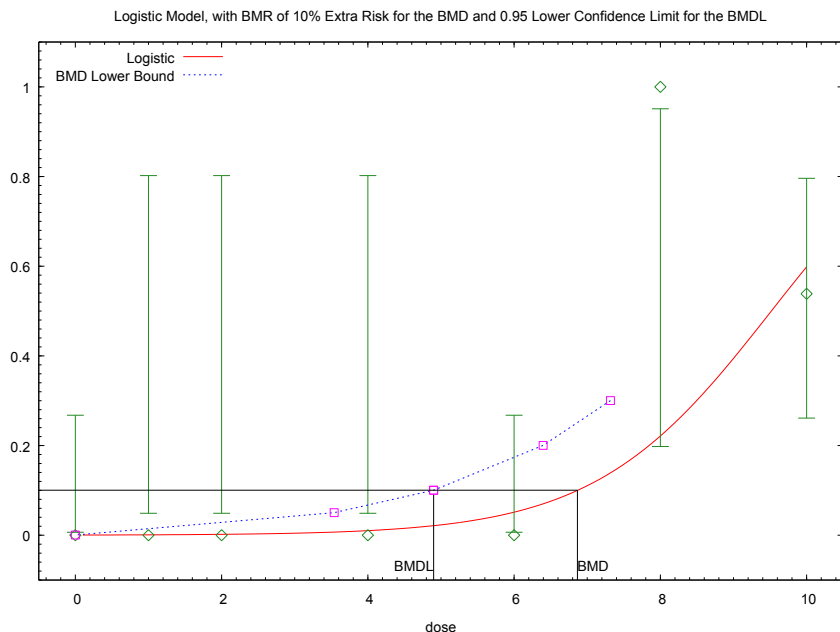

19:27 10/19 2016

```
=====
Logistic Model. (Version: 2.14; Date: 2/28/2013)
Input Data File:
C:/Users/edler/Desktop/BMDS2601_20150629/BMDS2601/Data/log_Hugehsgdogsvomit_Opt.(d)
Gnuplot Plotting File:
C:/Users/edler/Desktop/BMDS2601_20150629/BMDS2601/Data/log_Hugehsgdogsvomit_Opt.plt
Wed Oct 19 19:27:55 2016
=====
```

BMDS\_Model\_Run

The form of the probability function is:

$$P[\text{response}] = 1/[1+\text{EXP}(-\text{intercept}-\text{slope}*\text{dose})]$$

Dependent variable = Effect  
 Independent variable = Dose  
 Slope parameter is not restricted

Total number of observations = 7  
 Total number of records with missing values = 0  
 Maximum number of iterations = 500  
 Relative Function Convergence has been set to: 1e-008  
 Parameter Convergence has been set to: 1e-008

Default Initial Parameter Values  
background = 0 Specified  
intercept = -2.79186  
slope = 0.313956

Asymptotic Correlation Matrix of Parameter Estimates

( \*\*\* The model parameter(s) -background  
have been estimated at a boundary point, or have been specified by  
the user,  
and do not appear in the correlation matrix )

|           | intercept | slope |
|-----------|-----------|-------|
| intercept | 1         | -0.98 |
| slope     | -0.98     | 1     |

Parameter Estimates

| Interval<br>Variable<br>Conf. Limit | Estimate | Std. Err. | 95.0% Wald Confidence |       |
|-------------------------------------|----------|-----------|-----------------------|-------|
|                                     |          |           | Lower Conf. Limit     | Upper |
| intercept<br>2.36055                | -7.88813 | 2.82024   | -13.4157              | -     |
| slope<br>1.4259                     | 0.829423 | 0.304333  | 0.232942              |       |

Analysis of Deviance Table

| Model         | Log(likelihood) | # Param's | Deviance | Test d.f. | P-value |
|---------------|-----------------|-----------|----------|-----------|---------|
| Full model    | -8.97241        | 7         |          |           |         |
| Fitted model  | -12.8551        | 2         | 7.76543  | 5         | 0.1696  |
| Reduced model | -23.369         | 1         | 28.7932  | 6         | <.0001  |
| AIC:          | 29.7103         |           |          |           |         |

Goodness of Fit

| Dose    | Est._Prob. | Expected | Observed | Size   | Scaled Residual |
|---------|------------|----------|----------|--------|-----------------|
| 0.0000  | 0.0004     | 0.005    | 0.000    | 14.000 | -0.072          |
| 1.0000  | 0.0009     | 0.002    | 0.000    | 2.000  | -0.041          |
| 2.0000  | 0.0020     | 0.004    | 0.000    | 2.000  | -0.063          |
| 4.0000  | 0.0102     | 0.020    | 0.000    | 2.000  | -0.144          |
| 6.0000  | 0.0516     | 0.722    | 0.000    | 14.000 | -0.873          |
| 8.0000  | 0.2222     | 0.444    | 2.000    | 2.000  | 2.646           |
| 10.0000 | 0.6002     | 7.802    | 7.000    | 13.000 | -0.454          |

Chi^2 = 8.00      d.f. = 5      P-value = 0.1563

Benchmark Dose Computation

Specified effect = 0.1  
Risk Type = Extra risk

Confidence level = 0.95  
 BMD = 6.86579  
 BMDL = 4.89953

LogProbit Model, with BMR of 10% Extra Risk for the BMD and 0.95 Lower Confidence Limit for the BMDL

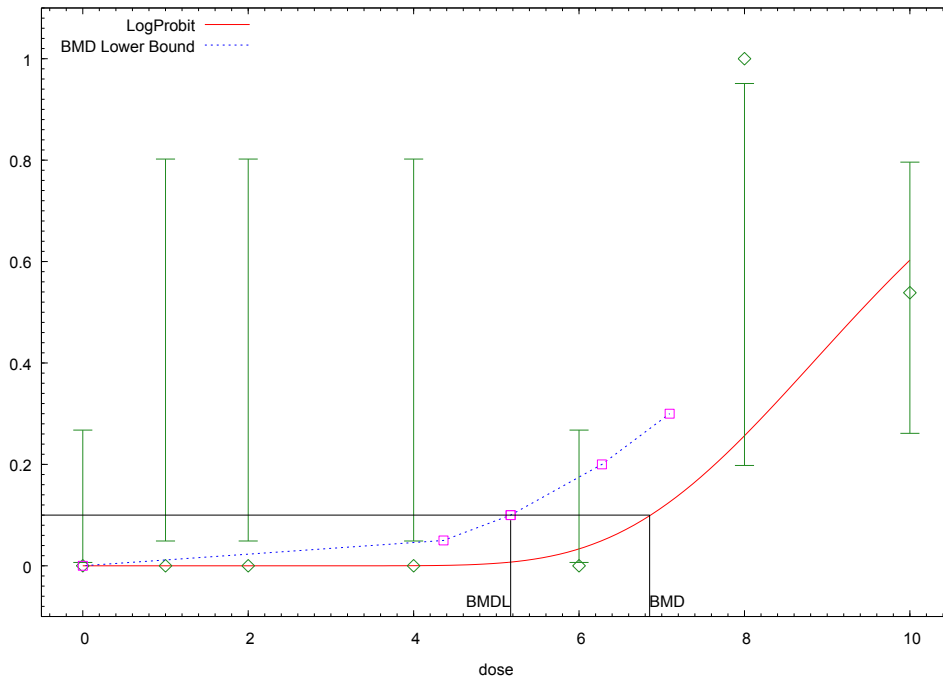

19:29 10/19 2016

```
=====  

  Probit Model. (Version: 3.3; Date: 2/28/2013)  

  Input Data File:  

  C:/Users/edler/Desktop/BMDS2601_20150629/BMDS2601/Data/lnp_Hugehsvomit_Opt.(d)  

  Gnuplot Plotting File:  

  C:/Users/edler/Desktop/BMDS2601_20150629/BMDS2601/Data/lnp_Hugehsvomit_Opt.plt  

  Wed Oct 19 19:29:07 2016  

  =====
```

BMDS\_Model\_Run

The form of the probability function is:

$$P[\text{response}] = \text{Background} + (1 - \text{Background}) * \text{CumNorm}(\text{Intercept} + \text{Slope} * \text{Log}(\text{Dose})),$$

where CumNorm(.) is the cumulative normal distribution function

Dependent variable = Effect  
 Independent variable = Dose  
 Slope parameter is not restricted

Total number of observations = 7  
 Total number of records with missing values = 0  
 Maximum number of iterations = 500  
 Relative Function Convergence has been set to: 1e-008  
 Parameter Convergence has been set to: 1e-008

User has chosen the log transformed model

Default Initial (and Specified) Parameter Values  
 background = 0  
 intercept = -1.95857  
 slope = 0.635671

Asymptotic Correlation Matrix of Parameter Estimates

( \*\*\* The model parameter(s) -background have been estimated at a boundary point, or have been specified by the user, and do not appear in the correlation matrix )

|           | intercept | slope |
|-----------|-----------|-------|
| intercept | 1         | -1    |
| slope     | -1        | 1     |

Parameter Estimates

|             |            | 95.0% Wald Confidence |           |                   |       |
|-------------|------------|-----------------------|-----------|-------------------|-------|
| Interval    | Variable   | Estimate              | Std. Err. | Lower Conf. Limit | Upper |
| Conf. Limit | background | 0                     | NA        |                   |       |
| 2.80386     | intercept  | -9.17682              | 3.25157   | -15.5498          | -     |
| 7.00916     | slope      | 4.10195               | 1.4833    | 1.19475           |       |

NA - Indicates that this parameter has hit a bound implied by some inequality constraint and thus has no standard error.

Analysis of Deviance Table

| Model         | Log(likelihood) | # Param's | Deviance | Test d.f. | P-value |
|---------------|-----------------|-----------|----------|-----------|---------|
| Full model    | -8.97241        | 7         |          |           |         |
| Fitted model  | -12.2795        | 2         | 6.61423  | 5         | 0.2509  |
| Reduced model | -23.369         | 1         | 28.7932  | 6         | <.0001  |
| AIC:          | 28.5591         |           |          |           |         |

Goodness of Fit

| Dose    | Est._Prob. | Expected | Observed | Size   | Scaled Residual |
|---------|------------|----------|----------|--------|-----------------|
| 0.0000  | 0.0000     | 0.000    | 0.000    | 14.000 | 0.000           |
| 1.0000  | 0.0000     | 0.000    | 0.000    | 2.000  | -0.000          |
| 2.0000  | 0.0000     | 0.000    | 0.000    | 2.000  | -0.000          |
| 4.0000  | 0.0002     | 0.000    | 0.000    | 2.000  | -0.022          |
| 6.0000  | 0.0338     | 0.474    | 0.000    | 14.000 | -0.700          |
| 8.0000  | 0.2588     | 0.518    | 2.000    | 2.000  | 2.393           |
| 10.0000 | 0.6058     | 7.875    | 7.000    | 13.000 | -0.497          |

Chi^2 = 6.47      d.f. = 5      P-value = 0.2635

Benchmark Dose Computation

Specified effect = 0.1

Risk Type = Extra risk  
 Confidence level = 0.95  
 BMD = 6.85349  
 BMDL = 5.1729

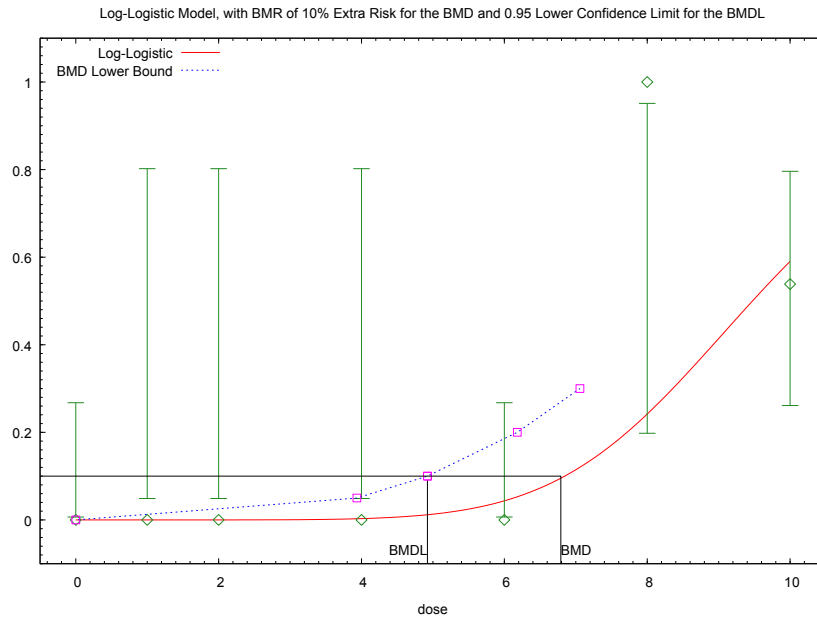

19:30 10/19 2016

```
=====
Logistic Model. (Version: 2.14; Date: 2/28/2013)
Input Data File:
C:/Users/edler/Desktop/BMDS2601_20150629/BMDS2601/Data/lnl_Hugehsvomit_Opt.(d)
Gnuplot Plotting File:
C:/Users/edler/Desktop/BMDS2601_20150629/BMDS2601/Data/lnl_Hugehsvomit_Opt.plt
Wed Oct 19 19:30:34 2016
=====
```

BMDS\_Model\_Run

The form of the probability function is:

$$P[\text{response}] = \text{background} + (1 - \text{background}) / [1 + \text{EXP}(-\text{intercept} - \text{slope} * \text{Log}(\text{dose}))]$$

Dependent variable = Effect  
 Independent variable = Dose  
 Slope parameter is not restricted

Total number of observations = 7  
 Total number of records with missing values = 0  
 Maximum number of iterations = 500  
 Relative Function Convergence has been set to: 1e-008  
 Parameter Convergence has been set to: 1e-008

User has chosen the log transformed model

Default Initial Parameter Values  
 background = 0  
 intercept = -2.19376

slope = 0.815501

Asymptotic Correlation Matrix of Parameter Estimates

( \*\*\* The model parameter(s) -background have been estimated at a boundary point, or have been specified by the user, and do not appear in the correlation matrix )

|           | intercept | slope |
|-----------|-----------|-------|
| intercept | 1         | -1    |
| slope     | -1        | 1     |

Parameter Estimates

|             |            | 95.0% Wald Confidence |           |                   |       |
|-------------|------------|-----------------------|-----------|-------------------|-------|
| Interval    | Variable   | Estimate              | Std. Err. | Lower Conf. Limit | Upper |
| Conf. Limit | background | 0                     | NA        |                   |       |
| 3.74686     | intercept  | -15.1551              | 5.82063   | -26.5633          | -     |
| 11.9209     | slope      | 6.76452               | 2.63088   | 1.60809           |       |

NA - Indicates that this parameter has hit a bound implied by some inequality constraint and thus has no standard error.

Analysis of Deviance Table

| Model         | Log(likelihood) | # Param's | Deviance | Test d.f. | P-value |
|---------------|-----------------|-----------|----------|-----------|---------|
| Full model    | -8.97241        | 7         |          |           |         |
| Fitted model  | -12.5076        | 2         | 7.07046  | 5         | 0.2155  |
| Reduced model | -23.369         | 1         | 28.7932  | 6         | <.0001  |
| AIC:          | 29.0153         |           |          |           |         |

Goodness of Fit

| Dose    | Est._Prob. | Expected | Observed | Size   | Scaled Residual |
|---------|------------|----------|----------|--------|-----------------|
| 0.0000  | 0.0000     | 0.000    | 0.000    | 14.000 | 0.000           |
| 1.0000  | 0.0000     | 0.000    | 0.000    | 2.000  | -0.001          |
| 2.0000  | 0.0000     | 0.000    | 0.000    | 2.000  | -0.008          |
| 4.0000  | 0.0031     | 0.006    | 0.000    | 2.000  | -0.079          |
| 6.0000  | 0.0459     | 0.642    | 0.000    | 14.000 | -0.821          |
| 8.0000  | 0.2519     | 0.504    | 2.000    | 2.000  | 2.437           |
| 10.0000 | 0.6037     | 7.848    | 7.000    | 13.000 | -0.481          |

Chi^2 = 6.85      d.f. = 5      P-value = 0.2319

Benchmark Dose Computation

Specified effect = 0.1  
 Risk Type = Extra risk  
 Confidence level = 0.95



BMD = 6.79077  
 BMDL = 4.92267

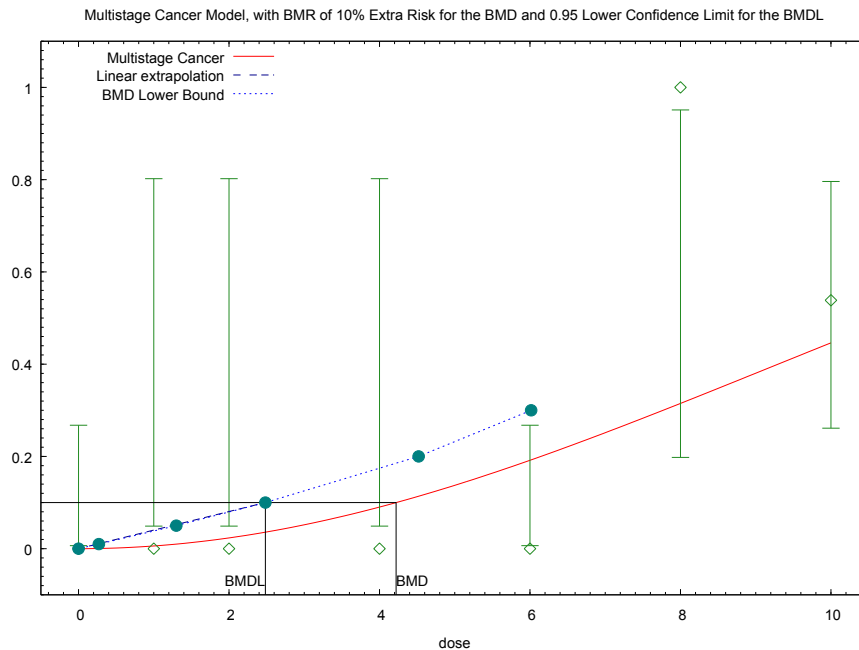

19:32 10/19 2016

```

=====
Multistage Model. (Version: 3.4; Date: 05/02/2014)
Input Data File:
C:/Users/edler/Desktop/BMDS2601_20150629/BMDS2601/Data/msc_Hugehsvommit_Opt.(d)
Gnuplot Plotting File:
C:/Users/edler/Desktop/BMDS2601_20150629/BMDS2601/Data/msc_Hugehsvommit_Opt.plt
Wed Oct 19 19:32:07 2016
=====
    
```

BMDS\_Model\_Run

The form of the probability function is:

$$P[\text{response}] = \text{background} + (1-\text{background}) * [1 - \text{EXP}(-\text{beta1} * \text{dose}^1 - \text{beta2} * \text{dose}^2)]$$

The parameter betas are restricted to be positive

Dependent variable = Effect  
 Independent variable = Dose

Total number of observations = 7  
 Total number of records with missing values = 0  
 Total number of parameters in model = 3  
 Total number of specified parameters = 0  
 Degree of polynomial = 2

Maximum number of iterations = 500  
 Relative Function Convergence has been set to: 1e-008  
 Parameter Convergence has been set to: 1e-008

Default Initial Parameter Values

Background = 0  
 Beta(1) = 4.26621e+018  
 Beta(2) = 0

Asymptotic Correlation Matrix of Parameter Estimates

( \*\*\* The model parameter(s) -Background -Beta(1) have been estimated at a boundary point, or have been specified by the user, and do not appear in the correlation matrix )

Beta(2)  
 Beta(2) 1

Parameter Estimates

|             |            | 95.0% Wald Confidence |            |                   |       |
|-------------|------------|-----------------------|------------|-------------------|-------|
| Interval    | Variable   | Estimate              | Std. Err.  | Lower Conf. Limit | Upper |
| Conf. Limit | Background | 0                     | NA         |                   |       |
|             | Beta(1)    | 0                     | NA         |                   |       |
|             | Beta(2)    | 0.00591458            | 0.00199656 | 0.0020014         |       |
|             |            | 0.00982776            |            |                   |       |

NA - Indicates that this parameter has hit a bound implied by some inequality constraint and thus has no standard error.

Analysis of Deviance Table

| Model         | Log(likelihood) | # Param's | Deviance | Test d.f. | P-value |
|---------------|-----------------|-----------|----------|-----------|---------|
| Full model    | -8.97241        | 7         |          |           |         |
| Fitted model  | -14.7321        | 1         | 11.5194  | 6         | 0.07359 |
| Reduced model | -23.369         | 1         | 28.7932  | 6         | <.0001  |
| AIC:          | 31.4643         |           |          |           |         |

Goodness of Fit

| Dose    | Est._Prob. | Expected | Observed | Size   | Scaled Residual |
|---------|------------|----------|----------|--------|-----------------|
| 0.0000  | 0.0000     | 0.000    | 0.000    | 14.000 | -0.000          |
| 1.0000  | 0.0059     | 0.012    | 0.000    | 2.000  | -0.109          |
| 2.0000  | 0.0234     | 0.047    | 0.000    | 2.000  | -0.219          |
| 4.0000  | 0.0903     | 0.181    | 0.000    | 2.000  | -0.446          |
| 6.0000  | 0.1918     | 2.685    | 0.000    | 14.000 | -1.823          |
| 8.0000  | 0.3151     | 0.630    | 2.000    | 2.000  | 2.085           |
| 10.0000 | 0.4465     | 5.804    | 7.000    | 13.000 | 0.667           |

Chi^2 = 8.37      d.f. = 6      P-value = 0.2121

Benchmark Dose Computation

Specified effect = 0.1  
 Risk Type = Extra risk  
 Confidence level = 0.95

BMD = 4.22063  
 BMDL = 2.48314  
 BMDU = 5.72306

Taken together, (2.48314, 5.72306) is a 90 % two-sided confidence interval for the BMD

Cancer Slope Factor = 0.0402716

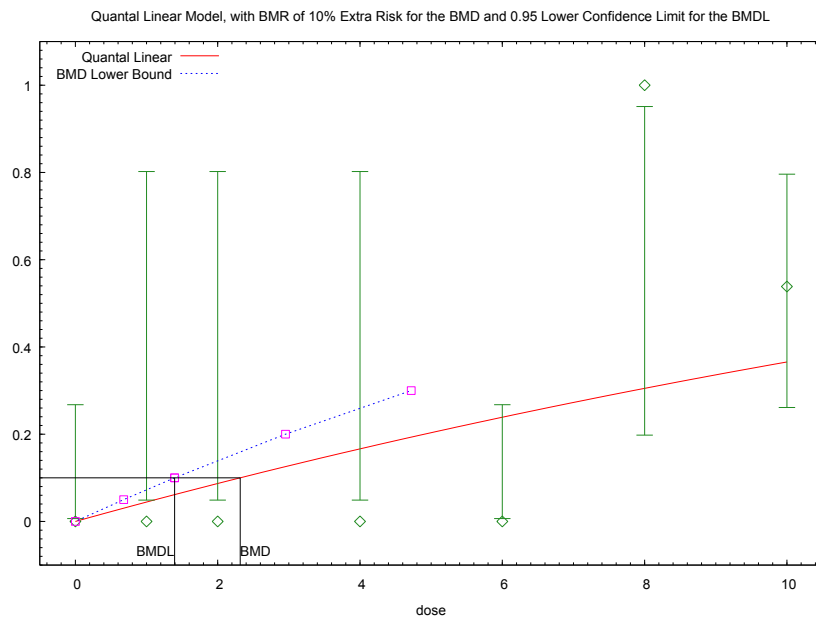

19:33 10/19 2016

```
=====
Quantal Linear Model using Weibull Model (Version: 2.16; Date: 2/28/2013)
Input Data File:
C:/Users/edler/Desktop/BMDS2601_20150629/BMDS2601/Data/qln_Hugehsvomit_Opt.(d)
Gnuplot Plotting File:
C:/Users/edler/Desktop/BMDS2601_20150629/BMDS2601/Data/qln_Hugehsvomit_Opt.plt
Wed Oct 19 19:33:30 2016
=====
```

BMDS\_Model\_Run

The form of the probability function is:

$$P[\text{response}] = \text{background} + (1-\text{background}) * [1-\text{EXP}(-\text{slope} * \text{dose})]$$

Dependent variable = Effect  
 Independent variable = Dose

Total number of observations = 7  
 Total number of records with missing values = 0  
 Maximum number of iterations = 500  
 Relative Function Convergence has been set to: 1e-008  
 Parameter Convergence has been set to: 1e-008

Default Initial (and Specified) Parameter Values

Background = 0.0625  
 Slope = 0.0697602  
 Power = 1 Specified

Asymptotic Correlation Matrix of Parameter Estimates

( \*\*\* The model parameter(s) -Background -Power  
 have been estimated at a boundary point, or have been specified by  
 the user,  
 and do not appear in the correlation matrix )

Slope

|       |   |
|-------|---|
| Slope | 1 |
|-------|---|

Parameter Estimates

|             |            | 95.0% Wald Confidence |           |                   |       |
|-------------|------------|-----------------------|-----------|-------------------|-------|
| Interval    | Variable   | Estimate              | Std. Err. | Lower Conf. Limit | Upper |
| Conf. Limit | Background | 0                     | NA        |                   |       |
| 0.0754358   | Slope      | 0.045484              | 0.0152818 | 0.0155322         |       |

NA - Indicates that this parameter has hit a bound implied by some inequality constraint and thus has no standard error.

Analysis of Deviance Table

| Model         | Log(likelihood) | # Param's | Deviance | Test d.f. | P-value |
|---------------|-----------------|-----------|----------|-----------|---------|
| Full model    | -8.97241        | 7         |          |           |         |
| Fitted model  | -16.6076        | 1         | 15.2704  | 6         | 0.01825 |
| Reduced model | -23.369         | 1         | 28.7932  | 6         | <.0001  |

AIC: 35.2152

Goodness of Fit

| Dose    | Est._Prob. | Expected | Observed | Size   | Scaled Residual |
|---------|------------|----------|----------|--------|-----------------|
| 0.0000  | 0.0000     | 0.000    | 0.000    | 14.000 | 0.000           |
| 1.0000  | 0.0445     | 0.089    | 0.000    | 2.000  | -0.305          |
| 2.0000  | 0.0870     | 0.174    | 0.000    | 2.000  | -0.436          |
| 4.0000  | 0.1663     | 0.333    | 0.000    | 2.000  | -0.632          |
| 6.0000  | 0.2388     | 3.344    | 0.000    | 14.000 | -2.096          |
| 8.0000  | 0.3050     | 0.610    | 2.000    | 2.000  | 2.135           |
| 10.0000 | 0.3655     | 4.751    | 7.000    | 13.000 | 1.295           |

Chi^2 = 11.31      d.f. = 6      P-value = 0.0792

Benchmark Dose Computation

Specified effect = 0.1  
 Risk Type = Extra risk  
 Confidence level = 0.95

BMD = 2.31643  
 BMDL = 1.39429

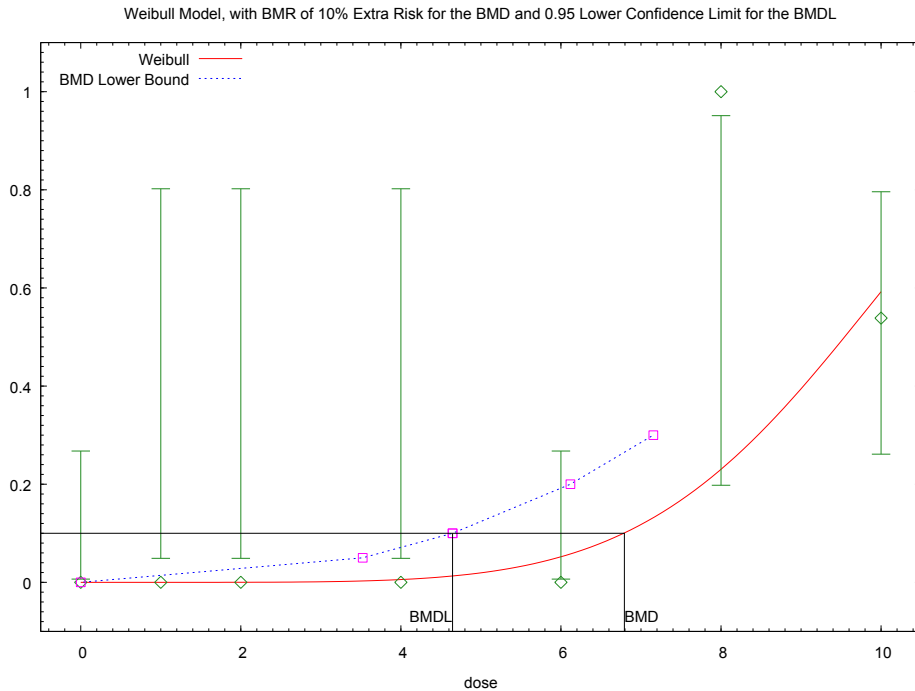

19:34 10/19 2016

```
=====
Weibull Model using Weibull Model (Version: 2.16; Date: 2/28/2013)
Input Data File:
C:/Users/edler/Desktop/BMDS2601_20150629/BMDS2601/Data/wei_Hugehsgdogsvomit_Opt.(d)
Gnuplot Plotting File:
C:/Users/edler/Desktop/BMDS2601_20150629/BMDS2601/Data/wei_Hugehsgdogsvomit_Opt.plt
Wed Oct 19 19:34:50 2016
=====
```

```
BMDS_Model_Run
~~~~~
```

The form of the probability function is:

$$P[\text{response}] = \text{background} + (1-\text{background}) * [1-\text{EXP}(-\text{slope} * \text{dose}^{\text{power}})]$$

Dependent variable = Effect  
 Independent variable = Dose  
 Power parameter is not restricted

Total number of observations = 7  
 Total number of records with missing values = 0  
 Maximum number of iterations = 500  
 Relative Function Convergence has been set to: 1e-008  
 Parameter Convergence has been set to: 1e-008

```
Default Initial (and Specified) Parameter Values
Background = 0.0625
Slope = 0.00453905
Power = 2.18664
```

Asymptotic Correlation Matrix of Parameter Estimates

( \*\*\* The model parameter(s) -Background have been estimated at a boundary point, or have been specified by the user, and do not appear in the correlation matrix )

|       | Slope | Power |
|-------|-------|-------|
| Slope | 1     | -1    |
| Power | -1    | 1     |

Parameter Estimates

|             |            | 95.0% Wald Confidence |             |                   |                   |
|-------------|------------|-----------------------|-------------|-------------------|-------------------|
| Interval    | Variable   | Estimate              | Std. Err.   | Lower Conf. Limit | Upper Conf. Limit |
|             | Background | 0                     | NA          |                   |                   |
| 2.9962e-005 | Slope      | 2.70866e-006          | 1.3905e-005 | -2.45447e-005     |                   |
| 9.97704     | Power      | 5.51646               | 2.27585     | 1.05589           |                   |

NA - Indicates that this parameter has hit a bound implied by some inequality constraint and thus has no standard error.

Analysis of Deviance Table

| Model         | Log(likelihood) | # Param's | Deviance | Test d.f. | P-value |
|---------------|-----------------|-----------|----------|-----------|---------|
| Full model    | -8.97241        | 7         |          |           |         |
| Fitted model  | -12.7463        | 2         | 7.54776  | 5         | 0.183   |
| Reduced model | -23.369         | 1         | 28.7932  | 6         | <.0001  |
| AIC:          | 29.4926         |           |          |           |         |

Goodness of Fit

| Dose    | Est._Prob. | Expected | Observed | Size   | Scaled Residual |
|---------|------------|----------|----------|--------|-----------------|
| 0.0000  | 0.0000     | 0.000    | 0.000    | 14.000 | 0.000           |
| 1.0000  | 0.0000     | 0.000    | 0.000    | 2.000  | -0.002          |
| 2.0000  | 0.0001     | 0.000    | 0.000    | 2.000  | -0.016          |
| 4.0000  | 0.0057     | 0.011    | 0.000    | 2.000  | -0.107          |
| 6.0000  | 0.0517     | 0.724    | 0.000    | 14.000 | -0.874          |
| 8.0000  | 0.2288     | 0.458    | 2.000    | 2.000  | 2.597           |
| 10.0000 | 0.5892     | 7.660    | 7.000    | 13.000 | -0.372          |

Chi^2 = 7.66      d.f. = 5      P-value = 0.1763

Benchmark Dose Computation

Specified effect = 0.1  
 Risk Type = Extra risk  
 Confidence level = 0.95  
 BMD = 6.79268

BMDL = 4.64587

Gamma dogs

```
=====
      Gamma Model. (Version: 2.16; Date: 2/28/2013)
      Input Data File:
C:/Users/edler/Desktop/BMDS2601_20150629/BMDS2601/Data/gam_Hugehsgdogsvomit_Opt.(d)
      Gnuplot Plotting File:
C:/Users/edler/Desktop/BMDS2601_20150629/BMDS2601/Data/gam_Hugehsgdogsvomit_Opt.plt
                                          Thu Oct 27 11:29:08 2016
=====
```

```
BMDS_Model_Run
~~~~~
```

The form of the probability function is:

$P[\text{response}] = \text{background} + (1 - \text{background}) * \text{CumGamma}[\text{slope} * \text{dose}, \text{power}]$ ,  
 where CumGamma(.) is the cumulative Gamma distribution function

Dependent variable = Effect  
 Independent variable = Dose  
 Power parameter is not restricted

Total number of observations = 7  
 Total number of records with missing values = 0  
 Maximum number of iterations = 500  
 Relative Function Convergence has been set to: 1e-008  
 Parameter Convergence has been set to: 1e-008

```
Default Initial (and Specified) Parameter Values
Background = 0.0625
Slope = 0.0710638
Power = 1.3
```

Asymptotic Correlation Matrix of Parameter Estimates

( \*\*\* The model parameter(s) -Background -Power  
 have been estimated at a boundary point, or have been specified by  
 the user,  
 and do not appear in the correlation matrix )

```
Slope
Slope      1
```

Parameter Estimates

| Interval    | Variable   | Estimate | Std. Err. | 95.0% Wald Confidence |       |
|-------------|------------|----------|-----------|-----------------------|-------|
|             |            |          |           | Lower Conf. Limit     | Upper |
| Conf. Limit | Background | 0        | NA        |                       |       |
| 2.13317     | Slope      | 1.87644  | 0.13099   | 1.6197                |       |

Power 18 NA

NA - Indicates that this parameter has hit a bound implied by some inequality constraint and thus has no standard error.

#### Analysis of Deviance Table

| Model         | Log(likelihood) | # Param's | Deviance | Test d.f. | P-value |
|---------------|-----------------|-----------|----------|-----------|---------|
| Full model    | -8.97241        | 7         |          |           |         |
| Fitted model  | -12.388         | 1         | 6.83117  | 6         | 0.3367  |
| Reduced model | -23.369         | 1         | 28.7932  | 6         | <.0001  |

AIC: 26.776

#### Goodness of Fit

| Dose    | Est._Prob. | Expected | Observed | Size   | Scaled Residual |
|---------|------------|----------|----------|--------|-----------------|
| 0.0000  | 0.0000     | 0.000    | 0.000    | 14.000 | 0.000           |
| 1.0000  | 0.0000     | 0.000    | 0.000    | 2.000  | -0.000          |
| 2.0000  | 0.0000     | 0.000    | 0.000    | 2.000  | -0.000          |
| 4.0000  | 0.0008     | 0.002    | 0.000    | 2.000  | -0.040          |
| 6.0000  | 0.0388     | 0.543    | 0.000    | 14.000 | -0.751          |
| 8.0000  | 0.2521     | 0.504    | 2.000    | 2.000  | 2.436           |
| 10.0000 | 0.6011     | 7.814    | 7.000    | 13.000 | -0.461          |

Chi<sup>2</sup> = 6.71      d.f. = 6      P-value = 0.3484

#### Benchmark Dose Computation

Specified effect = 0.1  
 Risk Type = Extra risk  
 Confidence level = 0.95  
 BMD = 6.83297  
 BMDL = 5.05101



## Supplementary information for CATSVOMIT (Hughes et al., 1999)

Details of the BMD Analysis of concentration-response data for vomiting in dogs of Hughes et al. (1999) reported in Appendix G, Section G.4.2.2 of the Scientific Opinion on the risks to human and animal health related to the presence of deoxynivalenol and its acetylated and modified forms in food and feed

Filename: CatsVomiting Folder: HughesVomiting

Output from BMDS from 19 Oct 2016 with the full information of the fit of all models of BMDS where a model fit was obtained in a reasonable duration of computing time.

The output is ordered in the sequence used in the Table G15 shown in Appendix G which is based on an order of increasing mathematical complexity. The two less complex multistage models are nested under the multistage model which was used with the default assumption of the degree of the polynomial of BMDS.

Occasionally, it was not possible to obtain graphic of the Gamma model with the notebook used for the calculation HP8440p or Lenovo 3508.

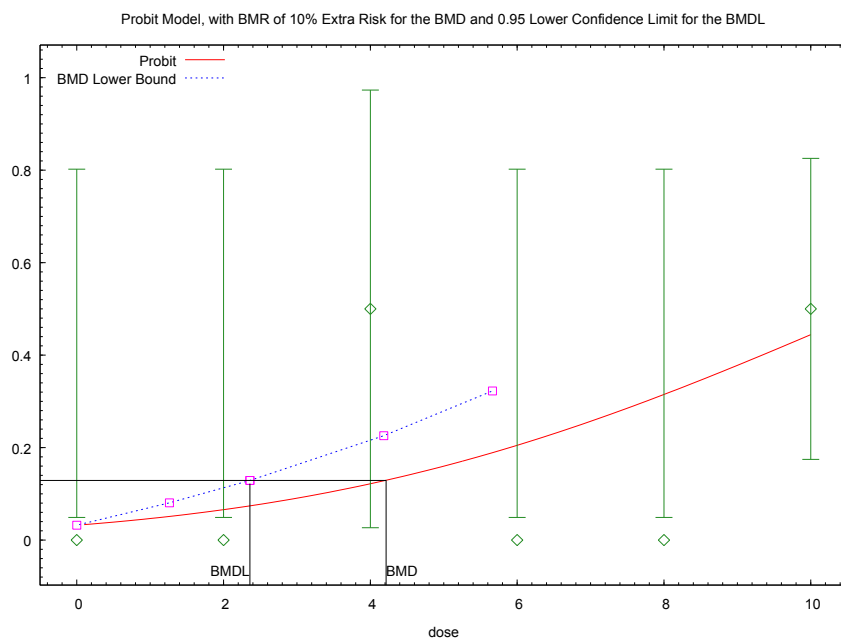

19:41 10/19 2016

```

=====
Probit Model. (Version: 3.3; Date: 2/28/2013)
Input Data File:
C:/Users/edler/Desktop/BMDS2601_20150629/BMDS2601/Data/pro_Hugehscatsvomit_Opt.(d)
Gnuplot Plotting File:
C:/Users/edler/Desktop/BMDS2601_20150629/BMDS2601/Data/pro_Hugehscatsvomit_Opt.plt
Wed Oct 19 19:41:07 2016
=====

```

BMDS\_Model\_Run

The form of the probability function is:

$$P[\text{response}] = \text{CumNorm}(\text{Intercept} + \text{Slope} * \text{Dose}),$$

where CumNorm(.) is the cumulative normal distribution function

Dependent variable = Effect

Independent variable = Dose

Slope parameter is not restricted

Total number of observations = 6  
 Total number of records with missing values = 0  
 Maximum number of iterations = 500  
 Relative Function Convergence has been set to: 1e-008  
 Parameter Convergence has been set to: 1e-008

Default Initial (and Specified) Parameter Values  
 background = 0 Specified  
 intercept = -1.49287  
 slope = 0.12796

Asymptotic Correlation Matrix of Parameter Estimates

( \*\*\* The model parameter(s) -background  
 have been estimated at a boundary point, or have been specified by  
 the user,  
 and do not appear in the correlation matrix )

|           | intercept | slope |
|-----------|-----------|-------|
| intercept | 1         | -0.94 |
| slope     | -0.94     | 1     |

Parameter Estimates

| Interval    | Variable  | Estimate | Std. Err. | 95.0% Wald Confidence |       |
|-------------|-----------|----------|-----------|-----------------------|-------|
|             |           |          |           | Lower Conf. Limit     | Upper |
| Conf. Limit | intercept | -1.85036 | 0.962378  | -3.73659              |       |
| 0.0358636   | slope     | 0.17058  | 0.114444  | -0.053725             |       |
| 0.394886    |           |          |           |                       |       |

Analysis of Deviance Table

| Model         | Log(likelihood) | # Param's | Deviance | Test d.f. | P-value |
|---------------|-----------------|-----------|----------|-----------|---------|
| Full model    | -6.93147        | 6         |          |           |         |
| Fitted model  | -9.2468         | 2         | 4.63066  | 4         | 0.3273  |
| Reduced model | -10.6352        | 1         | 7.40738  | 5         | 0.1921  |
| AIC:          | 22.4936         |           |          |           |         |

Goodness of Fit

| Dose    | Est._Prob. | Expected | Observed | Size  | Scaled Residual |
|---------|------------|----------|----------|-------|-----------------|
| 0.0000  | 0.0321     | 0.064    | 0.000    | 2.000 | -0.258          |
| 2.0000  | 0.0656     | 0.131    | 0.000    | 2.000 | -0.375          |
| 4.0000  | 0.1214     | 0.243    | 1.000    | 2.000 | 1.639           |
| 6.0000  | 0.2042     | 0.408    | 0.000    | 2.000 | -0.716          |
| 8.0000  | 0.3136     | 0.627    | 0.000    | 2.000 | -0.956          |
| 10.0000 | 0.4425     | 3.540    | 4.000    | 8.000 | 0.327           |

Chi^2 = 4.43      d.f. = 4      P-value = 0.3511

Benchmark Dose Computation

Specified effect = 0.1  
 Risk Type = Extra risk  
 Confidence level = 0.95  
 BMD = 4.21409  
 BMDL = 2.35852

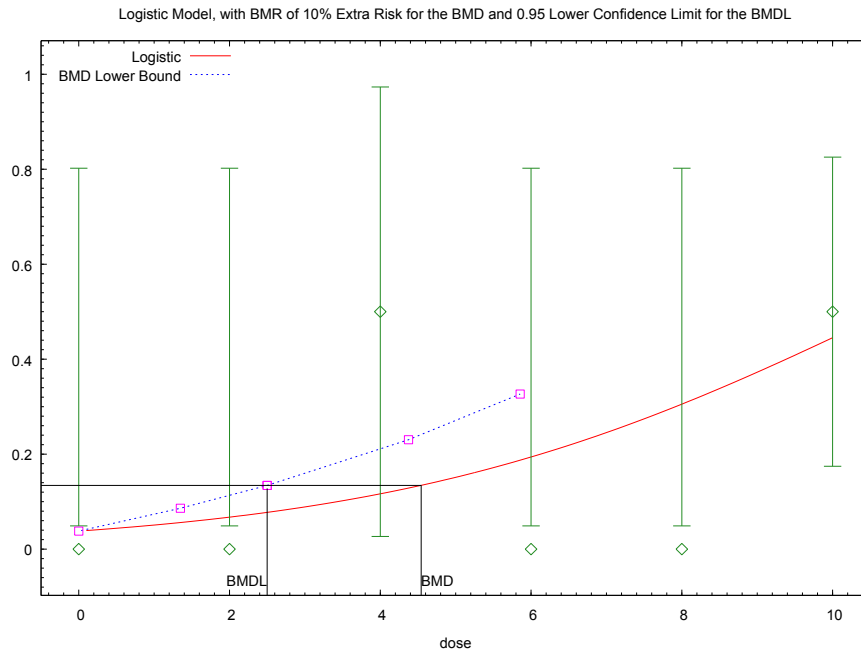

19:42 10/19 2016

```
=====
      Logistic Model. (Version: 2.14; Date: 2/28/2013)
      Input Data File:
C:/Users/edler/Desktop/BMDS2601_20150629/BMDS2601/Data/log_Hugehscatsvomit_Opt.(d)
      Gnuplot Plotting File:
C:/Users/edler/Desktop/BMDS2601_20150629/BMDS2601/Data/log_Hugehscatsvomit_Opt.plt
                                     Wed Oct 19 19:42:20 2016
=====
```

BMDS\_Model\_Run

~~~~~

The form of the probability function is:

$$P[\text{response}] = 1/[1+\text{EXP}(-\text{intercept}-\text{slope}*\text{dose})]$$

Dependent variable = Effect  
 Independent variable = Dose  
 Slope parameter is not restricted

Total number of observations = 6  
 Total number of records with missing values = 0  
 Maximum number of iterations = 500  
 Relative Function Convergence has been set to: 1e-008  
 Parameter Convergence has been set to: 1e-008

Default Initial Parameter Values  
background = 0 Specified  
intercept = -1.5328  
slope = 0.0919679

Asymptotic Correlation Matrix of Parameter Estimates

( \*\*\* The model parameter(s) -background  
have been estimated at a boundary point, or have been specified by  
the user,  
and do not appear in the correlation matrix )

|           | intercept | slope |
|-----------|-----------|-------|
| intercept | 1         | -0.95 |
| slope     | -0.95     | 1     |

Parameter Estimates

| Interval    | Variable  | Estimate | Std. Err. | 95.0% Wald Confidence |       |
|-------------|-----------|----------|-----------|-----------------------|-------|
|             |           |          |           | Lower Conf. Limit     | Upper |
| Conf. Limit | intercept | -3.23272 | 1.90545   | -6.96734              |       |
| 0.501899    | slope     | 0.301159 | 0.217233  | -0.124611             |       |
| 0.726928    |           |          |           |                       |       |

Analysis of Deviance Table

| Model         | Log(likelihood) | # Param's | Deviance | Test d.f. | P-value |
|---------------|-----------------|-----------|----------|-----------|---------|
| Full model    | -6.93147        | 6         |          |           |         |
| Fitted model  | -9.24436        | 2         | 4.62577  | 4         | 0.3279  |
| Reduced model | -10.6352        | 1         | 7.40738  | 5         | 0.1921  |
| AIC:          | 22.4887         |           |          |           |         |

Goodness of Fit

| Dose    | Est._Prob. | Expected | Observed | Size  | Scaled Residual |
|---------|------------|----------|----------|-------|-----------------|
| 0.0000  | 0.0380     | 0.076    | 0.000    | 2.000 | -0.281          |
| 2.0000  | 0.0672     | 0.134    | 0.000    | 2.000 | -0.380          |
| 4.0000  | 0.1163     | 0.233    | 1.000    | 2.000 | 1.693           |
| 6.0000  | 0.1938     | 0.388    | 0.000    | 2.000 | -0.693          |
| 8.0000  | 0.3050     | 0.610    | 0.000    | 2.000 | -0.937          |
| 10.0000 | 0.4449     | 3.560    | 4.000    | 8.000 | 0.313           |

Chi^2 = 4.55      d.f. = 4      P-value = 0.3372

Benchmark Dose Computation

Specified effect = 0.1  
Risk Type = Extra risk  
Confidence level = 0.95  
BMD = 4.54256

BMDL = 2.49929

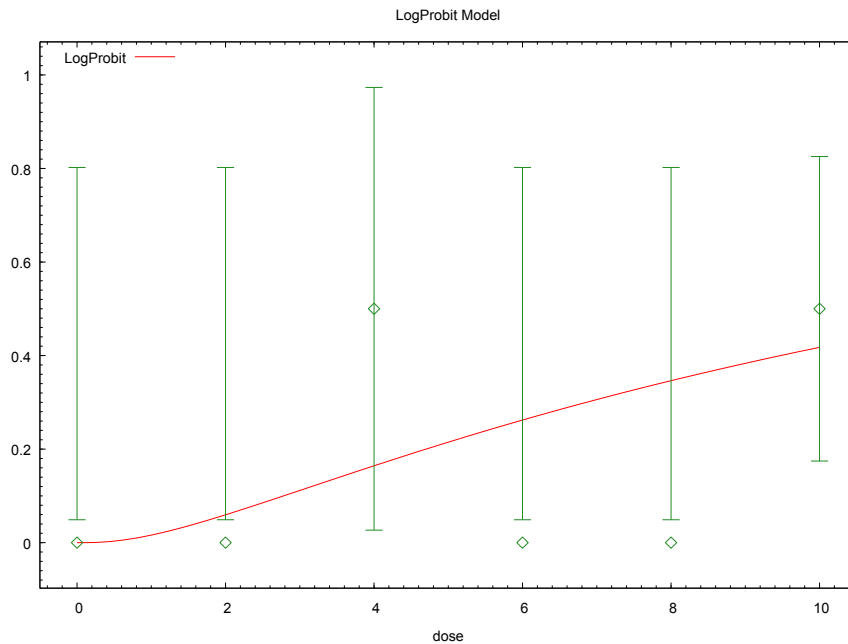

19:44 10/19 2016

```

=====
Probit Model. (Version: 3.3; Date: 2/28/2013)
Input Data File:
C:/Users/edler/Desktop/BMDS2601_20150629/BMDS2601/Data/lnp_Hugehscatsvomit_Opt.(d)
Gnuplot Plotting File:
C:/Users/edler/Desktop/BMDS2601_20150629/BMDS2601/Data/lnp_Hugehscatsvomit_Opt.plt
Wed Oct 19 19:44:39 2016
=====
    
```

BMDS\_Model\_Run

The form of the probability function is:

$$P[\text{response}] = \text{Background} + (1 - \text{Background}) * \text{CumNorm}(\text{Intercept} + \text{Slope} * \text{Log}(\text{Dose})),$$

where CumNorm(.) is the cumulative normal distribution function

Dependent variable = Effect  
 Independent variable = Dose  
 Slope parameter is not restricted

Total number of observations = 6  
 Total number of records with missing values = 0  
 Maximum number of iterations = 500  
 Relative Function Convergence has been set to: 1e-008  
 Parameter Convergence has been set to: 1e-008

User has chosen the log transformed model

```

Default Initial (and Specified) Parameter Values
background = 0
intercept = -1.21474
slope = 0.44955
    
```

Asymptotic Correlation Matrix of Parameter Estimates

( \*\*\* The model parameter(s) -background have been estimated at a boundary point, or have been specified by the user, and do not appear in the correlation matrix )

|           |           |       |
|-----------|-----------|-------|
|           | intercept | slope |
| intercept | 1         | -0.98 |
| slope     | -0.98     | 1     |

Parameter Estimates

|             |            | 95.0% Wald Confidence |           |                   |       |
|-------------|------------|-----------------------|-----------|-------------------|-------|
| Interval    | Variable   | Estimate              | Std. Err. | Lower Conf. Limit | Upper |
| Conf. Limit | background | 0                     | NA        |                   |       |
| 0.983281    | intercept  | -2.1403               | 1.59369   | -5.26388          |       |
| 2.35276     | slope      | 0.839456              | 0.772106  | -0.673844         |       |

NA - Indicates that this parameter has hit a bound implied by some inequality constraint and thus has no standard error.

Analysis of Deviance Table

| Model         | Log(likelihood) | # Param's | Deviance | Test d.f. | P-value |
|---------------|-----------------|-----------|----------|-----------|---------|
| Full model    | -6.93147        | 6         |          |           |         |
| Fitted model  | -9.22197        | 2         | 4.581    | 4         | 0.3331  |
| Reduced model | -10.6352        | 1         | 7.40738  | 5         | 0.1921  |
| AIC:          | 22.4439         |           |          |           |         |

Goodness of Fit

| Dose    | Est._Prob. | Expected | Observed | Size  | Scaled Residual |
|---------|------------|----------|----------|-------|-----------------|
| 0.0000  | 0.0000     | 0.000    | 0.000    | 2.000 | 0.000           |
| 2.0000  | 0.0596     | 0.119    | 0.000    | 2.000 | -0.356          |
| 4.0000  | 0.1644     | 0.329    | 1.000    | 2.000 | 1.281           |
| 6.0000  | 0.2623     | 0.525    | 0.000    | 2.000 | -0.843          |
| 8.0000  | 0.3465     | 0.693    | 0.000    | 2.000 | -1.030          |
| 10.0000 | 0.4179     | 3.343    | 4.000    | 8.000 | 0.471           |

Chi^2 = 3.76      d.f. = 4      P-value = 0.4394

Benchmark Dose Computation

Specified effect = 0.1  
 Risk Type = Extra risk  
 Confidence level = 0.95  
 BMD = 2.78147

Benchmark dose computation failed. Lower limit

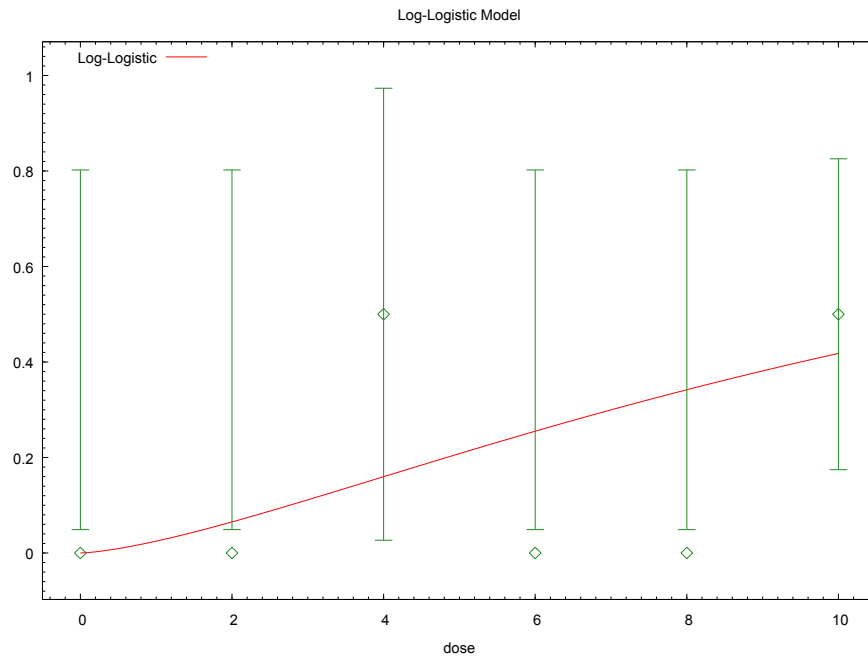

19:45 10/19 2016

```

=====
      Logistic Model. (Version: 2.14; Date: 2/28/2013)
      Input Data File:
C:/Users/edler/Desktop/BMDS2601_20150629/BMDS2601/Data/lnl_Hugehscatsvomit_Opt.(d)
      Gnuplot Plotting File:
C:/Users/edler/Desktop/BMDS2601_20150629/BMDS2601/Data/lnl_Hugehscatsvomit_Opt.plt
                                          Wed Oct 19 19:45:46 2016
=====
  
```

```

BMDS_Model_Run
~~~~~
  
```

The form of the probability function is:

$$P[\text{response}] = \text{background} + (1 - \text{background}) / [1 + \text{EXP}(-\text{intercept} - \text{slope} * \text{Log}(\text{dose}))]$$

Dependent variable = Effect  
 Independent variable = Dose  
 Slope parameter is not restricted

Total number of observations = 6  
 Total number of records with missing values = 0  
 Maximum number of iterations = 500  
 Relative Function Convergence has been set to: 1e-008  
 Parameter Convergence has been set to: 1e-008

User has chosen the log transformed model

Default Initial Parameter Values  
 background = 0

intercept = -1.60304  
 slope = 0.386137

Asymptotic Correlation Matrix of Parameter Estimates

( \*\*\* The model parameter(s) -background have been estimated at a boundary point, or have been specified by the user, and do not appear in the correlation matrix )

|           | intercept | slope |
|-----------|-----------|-------|
| intercept | 1         | -0.98 |
| slope     | -0.98     | 1     |

Parameter Estimates

| Interval    | Variable   | Estimate | Std. Err. | 95.0% Wald Confidence |       |
|-------------|------------|----------|-----------|-----------------------|-------|
|             |            |          |           | Lower Conf. Limit     | Upper |
| Conf. Limit | background | 0        | NA        |                       |       |
| 2.22047     | intercept  | -3.67491 | 3.0079    | -9.57029              |       |
| 4.25207     | slope      | 1.45434  | 1.42744   | -1.34338              |       |

NA - Indicates that this parameter has hit a bound implied by some inequality constraint and thus has no standard error.

Analysis of Deviance Table

| Model         | Log(likelihood) | # Param's | Deviance | Test d.f. | P-value |
|---------------|-----------------|-----------|----------|-----------|---------|
| Full model    | -6.93147        | 6         |          |           |         |
| Fitted model  | -9.22265        | 2         | 4.58236  | 4         | 0.3329  |
| Reduced model | -10.6352        | 1         | 7.40738  | 5         | 0.1921  |
| AIC:          | 22.4453         |           |          |           |         |

Goodness of Fit

| Dose    | Est._Prob. | Expected | Observed | Size  | Scaled Residual |
|---------|------------|----------|----------|-------|-----------------|
| 0.0000  | 0.0000     | 0.000    | 0.000    | 2.000 | 0.000           |
| 2.0000  | 0.0650     | 0.130    | 0.000    | 2.000 | -0.373          |
| 4.0000  | 0.1599     | 0.320    | 1.000    | 2.000 | 1.312           |
| 6.0000  | 0.2556     | 0.511    | 0.000    | 2.000 | -0.829          |
| 8.0000  | 0.3428     | 0.686    | 0.000    | 2.000 | -1.021          |
| 10.0000 | 0.4192     | 3.353    | 4.000    | 8.000 | 0.463           |

Chi^2 = 3.81      d.f. = 4      P-value = 0.4330

BMDL curve computation failed for BMR = 0.050000 .  
 The BMDL curve appearing in the graph may not be accurate.  
 BMDL curve computation failed for BMR = 0.100000 .  
 The BMDL curve appearing in the graph may not be accurate.  
 BMDL curve computation failed for BMR = 0.200000 .  
 The BMDL curve appearing in the graph may not be accurate.  
 BMDL curve computation failed for BMR = 0.300000 .  
 The BMDL curve appearing in the graph may not be accurate.



Benchmark Dose Computation

Specified effect = 0.1  
 Risk Type = Extra risk  
 Confidence level = 0.95  
 BMD = 2.76226

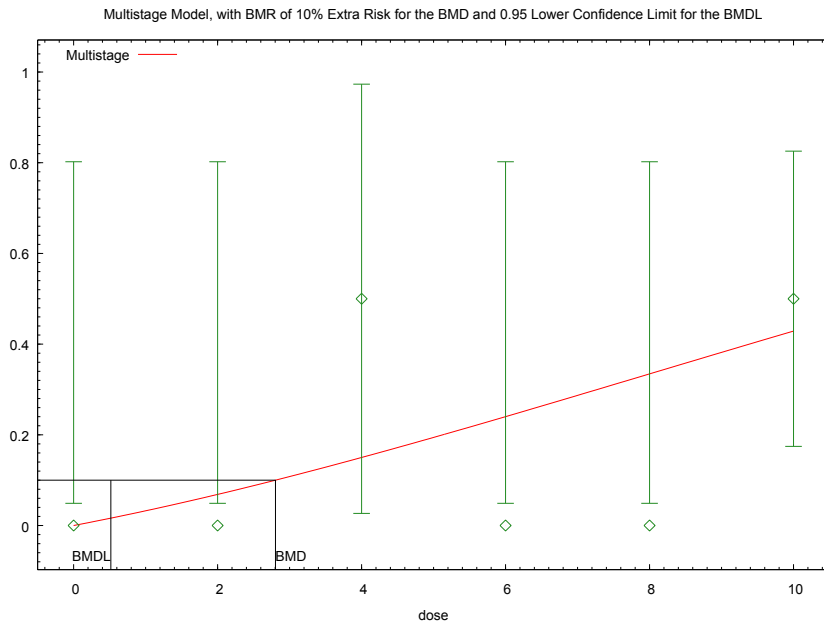

19:47 10/19 2016

Benchmark dose computation failed. Lower li

```

=====
Multistage Model. (Version: 3.4; Date: 05/02/2014)
Input Data File:
C:/Users/edler/Desktop/BMDS2601_20150629/BMDS2601/Data/mst_Hugehscatsvomit_Opt.(d)
Gnuplot Plotting File:
C:/Users/edler/Desktop/BMDS2601_20150629/BMDS2601/Data/mst_Hugehscatsvomit_Opt.plt
Wed Oct 19 19:47:07 2016
=====
    
```

BMDS\_Model\_Run

~~~~~

The form of the probability function is:

$$P[\text{response}] = \text{background} + (1-\text{background}) * [1 - \text{EXP}(-\text{beta1} * \text{dose}^{1-\text{beta2}} * \text{dose}^2)]$$

The parameter betas are not restricted

Dependent variable = Effect  
 Independent variable = Dose

Total number of observations = 6  
 Total number of records with missing values = 0  
 Total number of parameters in model = 3

Total number of specified parameters = 0  
 Degree of polynomial = 2

Maximum number of iterations = 500  
 Relative Function Convergence has been set to: 1e-008  
 Parameter Convergence has been set to: 1e-008

Default Initial Parameter Values

Background = 0.0715751  
 Beta(1) = 0.00866434  
 Beta(2) = 0.00309441

Asymptotic Correlation Matrix of Parameter Estimates

( \*\*\* The model parameter(s) -Background  
 have been estimated at a boundary point, or have been specified by  
 the user,  
 and do not appear in the correlation matrix )

|         | Beta(1) | Beta(2) |
|---------|---------|---------|
| Beta(1) | 1       | -0.94   |
| Beta(2) | -0.94   | 1       |

Parameter Estimates

| Interval    | Variable   | Estimate  | Std. Err.  | 95.0% Wald Confidence |       |
|-------------|------------|-----------|------------|-----------------------|-------|
| Conf. Limit |            |           |            | Lower Conf. Limit     | Upper |
|             | Background | 0         | NA         |                       |       |
| 0.168342    | Beta(1)    | 0.0304085 | 0.0703757  | -0.107525             |       |
| 0.0187505   | Beta(2)    | 0.0025553 | 0.00826301 | -0.0136399            |       |

NA - Indicates that this parameter has hit a bound implied by some inequality constraint and thus has no standard error.

Analysis of Deviance Table

| Model         | Log(likelihood) | # Param's | Deviance | Test d.f. | P-value |
|---------------|-----------------|-----------|----------|-----------|---------|
| Full model    | -6.93147        | 6         |          |           |         |
| Fitted model  | -9.19187        | 2         | 4.5208   | 4         | 0.3401  |
| Reduced model | -10.6352        | 1         | 7.40738  | 5         | 0.1921  |
| AIC:          | 22.3837         |           |          |           |         |

Goodness of Fit

| Dose   | Est._Prob. | Expected | Observed | Size  | Scaled Residual |
|--------|------------|----------|----------|-------|-----------------|
| 0.0000 | 0.0000     | 0.000    | 0.000    | 2.000 | 0.000           |
| 2.0000 | 0.0686     | 0.137    | 0.000    | 2.000 | -0.384          |
| 4.0000 | 0.1500     | 0.300    | 1.000    | 2.000 | 1.386           |
| 6.0000 | 0.2400     | 0.480    | 0.000    | 2.000 | -0.795          |
| 8.0000 | 0.3342     | 0.668    | 0.000    | 2.000 | -1.002          |

10.0000      0.4286            3.429      4.000            8.000            0.408  
 Chi^2 = 3.87      d.f. = 4            P-value = 0.4237

Benchmark Dose Computation

Specified effect =            0.1  
 Risk Type            =            Extra risk  
 Confidence level =            0.95  
  
                           BMD =            2.80409  
                           BMDL =            0.517005

BMDU did not converge for BMR = 0.100000  
 BMDU calculation failed  
                           BMDU =            2.80409

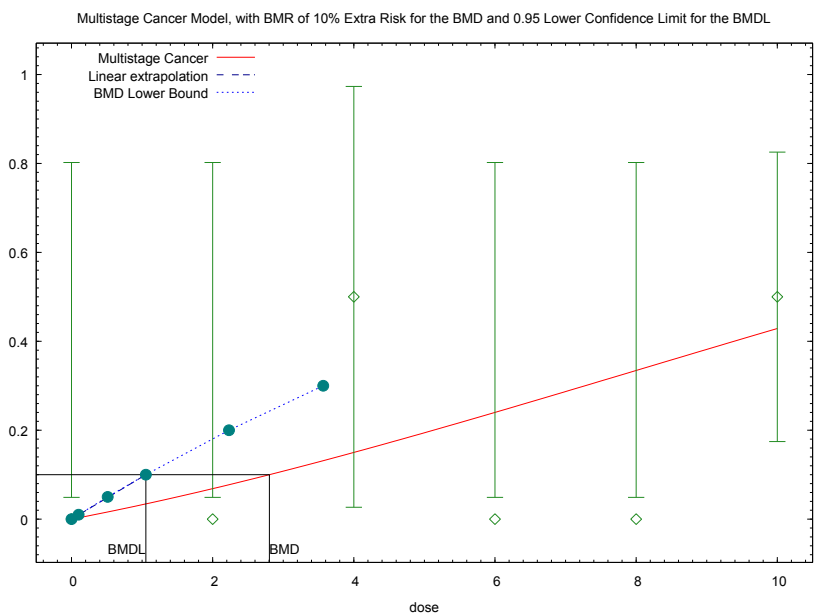

19:48 10/19 2016

```
=====
Multistage Model. (Version: 3.4; Date: 05/02/2014)
Input Data File:
C:/Users/edler/Desktop/BMDS2601_20150629/BMDS2601/Data/msc_Hugehscatsvomit_Opt.(d)
Gnuplot Plotting File:
C:/Users/edler/Desktop/BMDS2601_20150629/BMDS2601/Data/msc_Hugehscatsvomit_Opt.plt
Wed Oct 19 19:48:54 2016
=====
```

BMDS\_Model\_Run

The form of the probability function is:  

$$P[\text{response}] = \text{background} + (1-\text{background}) * [1 - \text{EXP}(-\text{beta1} * \text{dose}^{1-\text{beta2}} * \text{dose}^2)]$$

The parameter betas are restricted to be positive

Dependent variable = Effect  
 Independent variable = Dose

Total number of observations = 6  
 Total number of records with missing values = 0  
 Total number of parameters in model = 3  
 Total number of specified parameters = 0  
 Degree of polynomial = 2

Maximum number of iterations = 500  
 Relative Function Convergence has been set to: 1e-008  
 Parameter Convergence has been set to: 1e-008

Default Initial Parameter Values

Background = 0.0715751  
 Beta(1) = 0.00866434  
 Beta(2) = 0.00309441

Asymptotic Correlation Matrix of Parameter Estimates

( \*\*\* The model parameter(s) -Background  
 have been estimated at a boundary point, or have been specified by  
 the user,  
 and do not appear in the correlation matrix )

|         | Beta(1) | Beta(2) |
|---------|---------|---------|
| Beta(1) | 1       | -0.94   |
| Beta(2) | -0.94   | 1       |

Parameter Estimates

| Interval<br>Variable<br>Conf. Limit | Estimate  | Std. Err.  | 95.0% Wald Confidence |       |
|-------------------------------------|-----------|------------|-----------------------|-------|
|                                     |           |            | Lower                 | Upper |
| Background                          | 0         | NA         |                       |       |
| Beta(1)<br>0.168342                 | 0.0304085 | 0.0703757  | -0.107525             |       |
| Beta(2)<br>0.0187505                | 0.0025553 | 0.00826301 | -0.0136399            |       |

NA - Indicates that this parameter has hit a bound implied by some inequality constraint and thus has no standard error.

Analysis of Deviance Table

| Model         | Log(likelihood) | # Param's | Deviance | Test d.f. | P-value |
|---------------|-----------------|-----------|----------|-----------|---------|
| Full model    | -6.93147        | 6         |          |           |         |
| Fitted model  | -9.19187        | 2         | 4.5208   | 4         | 0.3401  |
| Reduced model | -10.6352        | 1         | 7.40738  | 5         | 0.1921  |

AIC: 22.3837

Goodness of Fit

| Dose   | Est._Prob. | Expected | Observed | Size  | Scaled Residual |
|--------|------------|----------|----------|-------|-----------------|
| 0.0000 | 0.0000     | 0.000    | 0.000    | 2.000 | 0.000           |

|         |        |       |       |       |        |
|---------|--------|-------|-------|-------|--------|
| 2.0000  | 0.0686 | 0.137 | 0.000 | 2.000 | -0.384 |
| 4.0000  | 0.1500 | 0.300 | 1.000 | 2.000 | 1.386  |
| 6.0000  | 0.2400 | 0.480 | 0.000 | 2.000 | -0.795 |
| 8.0000  | 0.3342 | 0.668 | 0.000 | 2.000 | -1.002 |
| 10.0000 | 0.4286 | 3.429 | 4.000 | 8.000 | 0.408  |

Chi<sup>2</sup> = 3.87      d.f. = 4      P-value = 0.4237

Benchmark Dose Computation

Specified effect = 0.1

Risk Type = Extra risk

Confidence level = 0.95

BMD = 2.80409

BMDL = 1.05353

BMDU = 44.3164

Taken together, (1.05353, 44.3164) is a 90 % two-sided confidence interval for the BMD

Cancer Slope Factor = 0.0949188

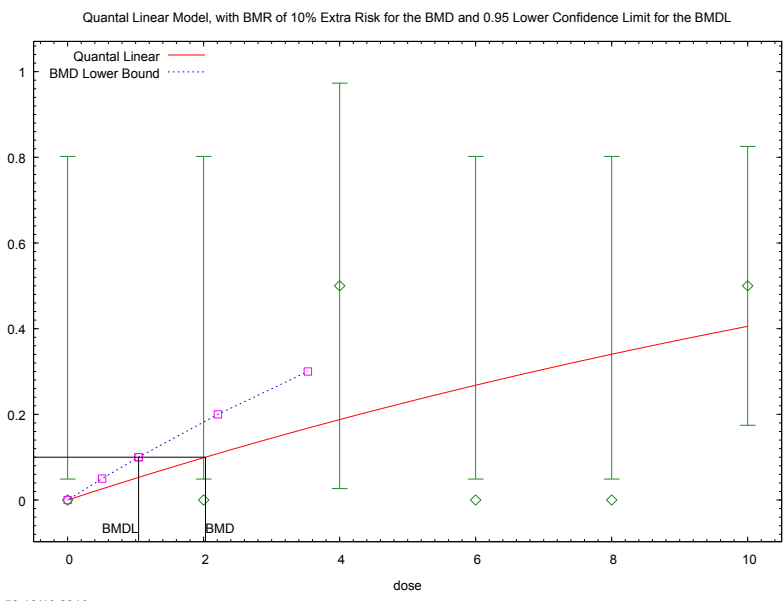

19:50 10/19 2016

```

=====
Quantal Linear Model using Weibull Model (Version: 2.16; Date: 2/28/2013)
Input Data File:
C:/Users/edler/Desktop/BMDS2601_20150629/BMDS2601/Data/qln_Hugehscatsvomit_Opt.(d)
Gnuplot Plotting File:
C:/Users/edler/Desktop/BMDS2601_20150629/BMDS2601/Data/qln_Hugehscatsvomit_Opt.plt
Wed Oct 19 19:50:25 2016
=====

```

BMDS\_Model\_Run

The form of the probability function is:

$$P[\text{response}] = \text{background} + (1-\text{background}) * [1-\text{EXP}(-\text{slope} * \text{dose})]$$

Dependent variable = Effect  
 Independent variable = Dose

Total number of observations = 6  
 Total number of records with missing values = 0  
 Maximum number of iterations = 500  
 Relative Function Convergence has been set to: 1e-008  
 Parameter Convergence has been set to: 1e-008

Default Initial (and Specified) Parameter Values  
 Background = 0.25  
 Slope = 0.0405465  
 Power = 1 Specified

Asymptotic Correlation Matrix of Parameter Estimates

( \*\*\* The model parameter(s) -Background -Power  
 have been estimated at a boundary point, or have been specified by  
 the user,  
 and do not appear in the correlation matrix )

Slope  
 Slope 1

Parameter Estimates

|             |            | 95.0% Wald Confidence |           |                   |       |
|-------------|------------|-----------------------|-----------|-------------------|-------|
| Interval    | Variable   | Estimate              | Std. Err. | Lower Conf. Limit | Upper |
| Conf. Limit | Background | 0                     | NA        |                   |       |
|             | Slope      | 0.0519717             | 0.0234603 | 0.00599037        |       |
|             |            |                       |           | 0.0979531         |       |

NA - Indicates that this parameter has hit a bound implied by some inequality constraint and thus has no standard error.

Analysis of Deviance Table

| Model         | Log(likelihood) | # Param's | Deviance | Test d.f. | P-value |
|---------------|-----------------|-----------|----------|-----------|---------|
| Full model    | -6.93147        | 6         |          |           |         |
| Fitted model  | -9.23515        | 1         | 4.60737  | 5         | 0.4656  |
| Reduced model | -10.6352        | 1         | 7.40738  | 5         | 0.1921  |
| AIC:          | 20.4703         |           |          |           |         |

Goodness of Fit

| Dose    | Est._Prob. | Expected | Observed | Size  | Scaled Residual |
|---------|------------|----------|----------|-------|-----------------|
| 0.0000  | 0.0000     | 0.000    | 0.000    | 2.000 | 0.000           |
| 2.0000  | 0.0987     | 0.197    | 0.000    | 2.000 | -0.468          |
| 4.0000  | 0.1877     | 0.375    | 1.000    | 2.000 | 1.131           |
| 6.0000  | 0.2679     | 0.536    | 0.000    | 2.000 | -0.855          |
| 8.0000  | 0.3402     | 0.680    | 0.000    | 2.000 | -1.015          |
| 10.0000 | 0.4053     | 3.242    | 4.000    | 8.000 | 0.546           |

Chi^2 = 3.56      d.f. = 5      P-value = 0.6145

Benchmark Dose Computation

Specified effect = 0.1  
 Risk Type = Extra risk  
 Confidence level = 0.95  
 BMD = 2.02727  
 BMDL = 1.04345

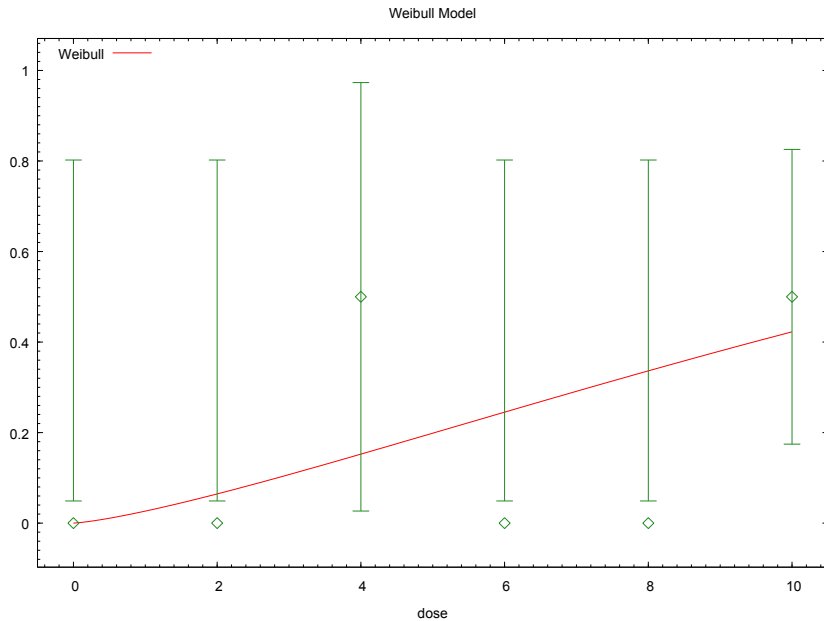

19:52 10/19 2016

```
=====
Weibull Model using Weibull Model (Version: 2.16; Date: 2/28/2013)
Input Data File:
C:/Users/edler/Desktop/BMDS2601_20150629/BMDS2601/Data/wei_Hugehscatsvomit_Opt.(d)
Gnuplot Plotting File:
C:/Users/edler/Desktop/BMDS2601_20150629/BMDS2601/Data/wei_Hugehscatsvomit_Opt.plt
Wed Oct 19 19:52:16 2016
=====
```

BMDS\_Model\_Run

The form of the probability function is:

$$P[\text{response}] = \text{background} + (1-\text{background}) * [1-\text{EXP}(-\text{slope} * \text{dose}^{\text{power}})]$$

Dependent variable = Effect  
 Independent variable = Dose  
 Power parameter is not restricted

Total number of observations = 6  
 Total number of records with missing values = 0  
 Maximum number of iterations = 500  
 Relative Function Convergence has been set to: 1e-008  
 Parameter Convergence has been set to: 1e-008

Default Initial (and Specified) Parameter Values

Background = 0.25  
 Slope = 0.0879223  
 Power = 0.663855

Asymptotic Correlation Matrix of Parameter Estimates

( \*\*\* The model parameter(s) -Background have been estimated at a boundary point, or have been specified by the user, and do not appear in the correlation matrix )

|       | Slope | Power |
|-------|-------|-------|
| Slope | 1     | -0.99 |
| Power | -0.99 | 1     |

Parameter Estimates

|             |            | 95.0% Wald Confidence |           |                   |       |
|-------------|------------|-----------------------|-----------|-------------------|-------|
| Interval    | Variable   | Estimate              | Std. Err. | Lower Conf. Limit | Upper |
| Conf. Limit | Background | 0                     | NA        |                   |       |
| 0.176706    | Slope      | 0.0269398             | 0.0764128 | -0.122827         |       |
| 3.9073      | Power      | 1.31346               | 1.32341   | -1.28037          |       |

NA - Indicates that this parameter has hit a bound implied by some inequality constraint and thus has no standard error.

Analysis of Deviance Table

| Model         | Log(likelihood) | # Param's | Deviance | Test d.f. | P-value |
|---------------|-----------------|-----------|----------|-----------|---------|
| Full model    | -6.93147        | 6         |          |           |         |
| Fitted model  | -9.20446        | 2         | 4.54598  | 4         | 0.3371  |
| Reduced model | -10.6352        | 1         | 7.40738  | 5         | 0.1921  |
| AIC:          | 22.4089         |           |          |           |         |

Goodness of Fit

| Dose    | Est._Prob. | Expected | Observed | Size  | Scaled Residual |
|---------|------------|----------|----------|-------|-----------------|
| 0.0000  | 0.0000     | 0.000    | 0.000    | 2.000 | 0.000           |
| 2.0000  | 0.0648     | 0.130    | 0.000    | 2.000 | -0.372          |
| 4.0000  | 0.1533     | 0.307    | 1.000    | 2.000 | 1.361           |
| 6.0000  | 0.2468     | 0.494    | 0.000    | 2.000 | -0.810          |
| 8.0000  | 0.3387     | 0.677    | 0.000    | 2.000 | -1.012          |
| 10.0000 | 0.4256     | 3.405    | 4.000    | 8.000 | 0.426           |

Chi^2 = 3.85      d.f. = 4      P-value = 0.4265

Benchmark Dose Computation

Specified effect = 0.1  
 Risk Type = Extra risk  
 Confidence level = 0.95



BMD = 2.82444

Benchmark dose computation failed. Lower limit i

## Supplementary information for WUDON (Wu et al., 2013a)

Details of the BMD Analysis of concentration-response data for vomiting in mink of Wu et al. (2013) reported in Appendix G, Section G.4.3.1 of the Scientific Opinion on the risks to human and animal health related to the presence of deoxynivalenol and its acetylated and modified forms in food and feed - for DON

Filename: WuDON

Folder: Mink

Output from BMDS from 19 Oct 2016 with the full information of the fit of all models of BMDS where a model fit was obtained in a reasonable duration of computing time.

The output is ordered in the sequence used in the Table G16 shown in Appendix G which is based on an order of increasing mathematical complexity. The two less complex multistage models are nested under the multistage model which was used with the default assumption of the degree of the polynomial of BMDS.

Gamma model not shown below.

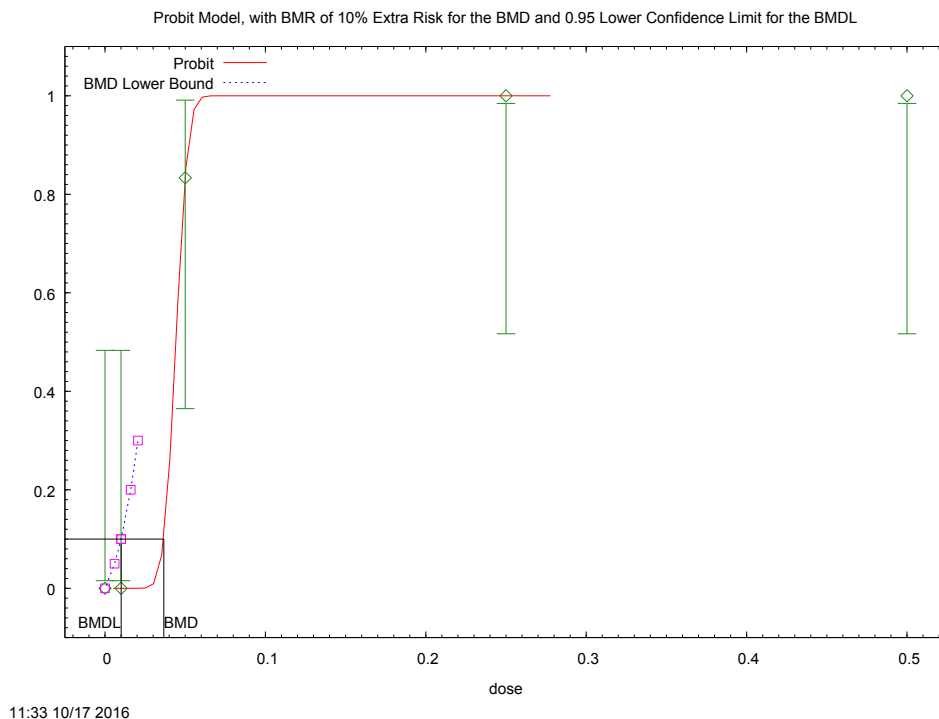

```

=====
Probit Model. (Version: 3.3; Date: 2/28/2013)
Input Data File:
C:/Users/edler/Desktop/BMDS2601_20150629/BMDS2601/Data/pro_Wu2013DONb_Opt.(d)
Gnuplot Plotting File:
C:/Users/edler/Desktop/BMDS2601_20150629/BMDS2601/Data/pro_Wu2013DONb_Opt.plt
Mon Oct 17 11:33:07 2016
=====

```

BMDS\_Model\_Run

The form of the probability function is:

$$P[\text{response}] = \text{CumNorm}(\text{Intercept} + \text{Slope} * \text{Dose}),$$

where CumNorm(.) is the cumulative normal distribution function

Dependent variable = Effect  
 Independent variable = Dose  
 Slope parameter is not restricted

Total number of observations = 5  
 Total number of records with missing values = 0  
 Maximum number of iterations = 500  
 Relative Function Convergence has been set to: 1e-008  
 Parameter Convergence has been set to: 1e-008

Default Initial (and Specified) Parameter Values

background = 0 Specified  
 intercept = -0.977134  
 slope = 6.74251

Asymptotic Correlation Matrix of Parameter Estimates

( \*\*\* The model parameter(s) -background  
 have been estimated at a boundary point, or have been specified by  
 the user,  
 and do not appear in the correlation matrix )

|           | intercept | slope |
|-----------|-----------|-------|
| intercept | 1         | -1    |
| slope     | -1        | 1     |

Parameter Estimates

| Interval    | Variable  | Estimate | Std. Err. | 95.0% Wald Confidence |       |
|-------------|-----------|----------|-----------|-----------------------|-------|
|             |           |          |           | Lower Conf. Limit     | Upper |
| Conf. Limit | intercept | -7.46646 | 8633.95   | -16929.7              |       |
| 16914.8     | slope     | 168.677  | 172679    | -338276               |       |
| 338613      |           |          |           |                       |       |

Analysis of Deviance Table

| Model         | Log(likelihood) | # Param's | Deviance     | Test d.f. | P-value |
|---------------|-----------------|-----------|--------------|-----------|---------|
| Full model    | -2.70337        | 5         |              |           |         |
| Fitted model  | -2.70337        | 2         | 4.52377e-008 | 3         | 1       |
| Reduced model | -20.527         | 1         | 35.6472      | 4         | <.0001  |
| AIC:          | 9.40673         |           |              |           |         |

Goodness of Fit

| Dose   | Est._Prob. | Expected | Observed | Size  | Scaled Residual |
|--------|------------|----------|----------|-------|-----------------|
| 0.0000 | 0.0000     | 0.000    | 0.000    | 6.000 | -0.000          |
| 0.0100 | 0.0000     | 0.000    | 0.000    | 6.000 | -0.000          |
| 0.0500 | 0.8333     | 5.000    | 5.000    | 6.000 | 0.000           |
| 0.2500 | 1.0000     | 6.000    | 6.000    | 6.000 | 0.000           |
| 0.5000 | 1.0000     | 6.000    | 6.000    | 6.000 | 0.000           |

Chi<sup>2</sup> = 0.00      d.f. = 3      P-value = 1.0000

Benchmark Dose Computation

Specified effect = 0.1  
 Risk Type = Extra risk  
 Confidence level = 0.95  
 BMD = 0.0366671  
 BMDL = 0.0100819

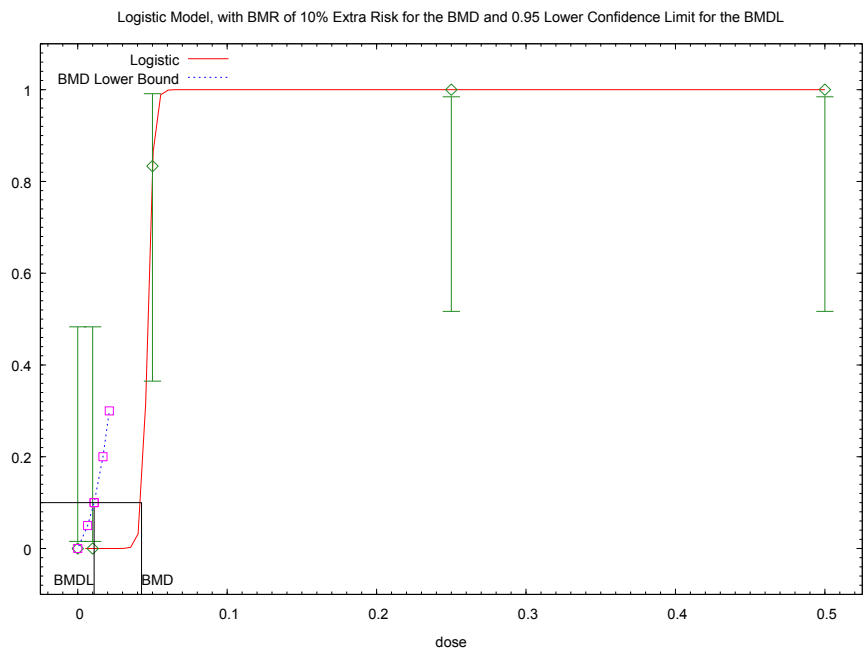

11:35 10/17 2016

```
=====
      Logistic Model. (Version: 2.14; Date: 2/28/2013)
      Input Data File:
      C:/Users/edler/Desktop/BMDS2601_20150629/BMDS2601/Data/log_Wu2013DONb_Opt.(d)
      Gnuplot Plotting File:
      C:/Users/edler/Desktop/BMDS2601_20150629/BMDS2601/Data/log_Wu2013DONb_Opt.plt
      Mon Oct 17 11:35:22 2016
=====
```

```
BMDS_Model_Run
~~~~~
```

The form of the probability function is:  
 $P[\text{response}] = 1/[1+\text{EXP}(-\text{intercept}-\text{slope}*\text{dose})]$

Dependent variable = Effect  
 Independent variable = Dose  
 Slope parameter is not restricted  
 Total number of observations = 5

Total number of records with missing values = 0  
 Maximum number of iterations = 500  
 Relative Function Convergence has been set to: 1e-008  
 Parameter Convergence has been set to: 1e-008

Default Initial Parameter Values  
 background = 0 Specified  
 intercept = -1.28415  
 slope = 9.53091

Asymptotic Correlation Matrix of Parameter Estimates

( \*\*\* The model parameter(s) -background  
 have been estimated at a boundary point, or have been specified by  
 the user,  
 and do not appear in the correlation matrix )

|           | intercept | slope |
|-----------|-----------|-------|
| intercept | NA        | NA    |
| slope     | NA        | NA    |

NA - This parameter's variance has been estimated as zero or less.  
 THE MODEL HAS PROBABLY NOT CONVERGED!!!

Parameter Estimates

|             |           | 95.0% Wald Confidence |           |                   |       |
|-------------|-----------|-----------------------|-----------|-------------------|-------|
| Interval    | Variable  | Estimate              | Std. Err. | Lower Conf. Limit | Upper |
| Conf. Limit | intercept | -24.4798              | NA        | NA                |       |
| NA          |           |                       |           |                   |       |
|             | slope     | 521.784               | NA        | NA                |       |
| NA          |           |                       |           |                   |       |

At least some variance estimates are negative.  
 THIS USUALLY MEANS THE MODEL HAS NOT CONVERGED!  
 Try again from another starting point.

Analysis of Deviance Table

| Model         | Log(likelihood) | # Param's | Deviance     | Test d.f. | P-value |
|---------------|-----------------|-----------|--------------|-----------|---------|
| Full model    | -2.70337        | 5         |              |           |         |
| Fitted model  | -2.70337        | 2         | 5.29225e-008 | 3         | 1       |
| Reduced model | -20.527         | 1         | 35.6472      | 4         | <.0001  |
| AIC:          | 9.40673         |           |              |           |         |

Goodness of Fit

| Dose   | Est._Prob. | Expected | Observed | Size  | Scaled Residual |
|--------|------------|----------|----------|-------|-----------------|
| 0.0000 | 0.0000     | 0.000    | 0.000    | 6.000 | -0.000          |
| 0.0100 | 0.0000     | 0.000    | 0.000    | 6.000 | -0.000          |
| 0.0500 | 0.8333     | 5.000    | 5.000    | 6.000 | -0.000          |
| 0.2500 | 1.0000     | 6.000    | 6.000    | 6.000 | 0.000           |
| 0.5000 | 1.0000     | 6.000    | 6.000    | 6.000 | 0.000           |

Chi<sup>2</sup> = 0.00      d.f. = 3      P-value = 1.0000

Benchmark Dose Computation

Specified effect =                    0.1  
 Risk Type                    =        Extra risk  
 Confidence level =                    0.95  
                                           BMD =            0.0427045  
                                           BMDL =           0.0109621

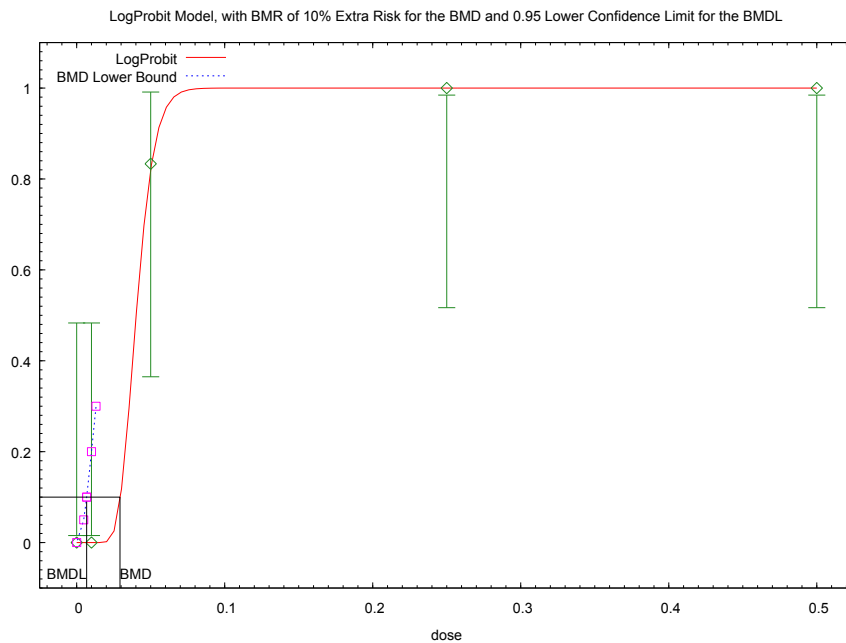

11:36 10/17 2016

```
=====
      Probit Model. (Version: 3.3; Date: 2/28/2013)
      Input Data File:
      C:/Users/edler/Desktop/BMDS2601_20150629/BMDS2601/Data/lnp_Wu2013DONb_Opt.(d)
      Gnuplot Plotting File:
      C:/Users/edler/Desktop/BMDS2601_20150629/BMDS2601/Data/lnp_Wu2013DONb_Opt.plt
      Mon Oct 17 11:36:24 2016
=====
```

BMDS\_Model\_Run

The form of the probability function is:

$$P[\text{response}] = \text{Background} + (1 - \text{Background}) * \text{CumNorm}(\text{Intercept} + \text{Slope} * \text{Log}(\text{Dose})),$$

where CumNorm(.) is the cumulative normal distribution function

Dependent variable = Effect  
 Independent variable = Dose  
 Slope parameter is not restricted

Total number of observations = 5  
 Total number of records with missing values = 0

Maximum number of iterations = 500  
 Relative Function Convergence has been set to: 1e-008  
 Parameter Convergence has been set to: 1e-008

User has chosen the log transformed model

Default Initial (and Specified) Parameter Values

background = 0  
 intercept = 2.37622  
 slope = 0.730575

Asymptotic Correlation Matrix of Parameter Estimates

( \*\*\* The model parameter(s) -background  
 have been estimated at a boundary point, or have been specified by  
 the user,  
 and do not appear in the correlation matrix )

|           | intercept | slope |
|-----------|-----------|-------|
| intercept | 1         | 1     |
| slope     | 1         | 1     |

Parameter Estimates

| Interval    | Variable   | Estimate | Std. Err. | 95.0% Wald Confidence |       |
|-------------|------------|----------|-----------|-----------------------|-------|
| Conf. Limit |            |          |           | Lower                 | Upper |
|             | background | 0        | NA        |                       |       |
| 4226.56     | intercept  | 13.5474  | 2149.54   | -4199.47              |       |
| 1410.54     | slope      | 4.19931  | 717.533   | -1402.14              |       |

NA - Indicates that this parameter has hit a bound implied by some inequality constraint and thus has no standard error.

Analysis of Deviance Table

| Model         | Log(likelihood) | # Param's | Deviance     | Test d.f. | P-value |
|---------------|-----------------|-----------|--------------|-----------|---------|
| Full model    | -2.70337        | 5         |              |           |         |
| Fitted model  | -2.70337        | 2         | 4.23246e-008 | 3         | 1       |
| Reduced model | -20.527         | 1         | 35.6472      | 4         | <.0001  |
| AIC:          | 9.40673         |           |              |           |         |

Goodness of Fit

| Dose   | Est._Prob. | Expected | Observed | Size  | Scaled Residual |
|--------|------------|----------|----------|-------|-----------------|
| 0.0000 | 0.0000     | 0.000    | 0.000    | 6.000 | 0.000           |
| 0.0100 | 0.0000     | 0.000    | 0.000    | 6.000 | -0.000          |
| 0.0500 | 0.8333     | 5.000    | 5.000    | 6.000 | 0.000           |
| 0.2500 | 1.0000     | 6.000    | 6.000    | 6.000 | 0.000           |
| 0.5000 | 1.0000     | 6.000    | 6.000    | 6.000 | 0.000           |

Chi<sup>2</sup> = 0.00      d.f. = 3      P-value = 1.0000

Benchmark Dose Computation

Specified effect =                    0.1  
 Risk Type                    =        Extra risk  
 Confidence level =                    0.95  
                                           BMD =            0.0292672  
                                           BMDL =           0.00672434

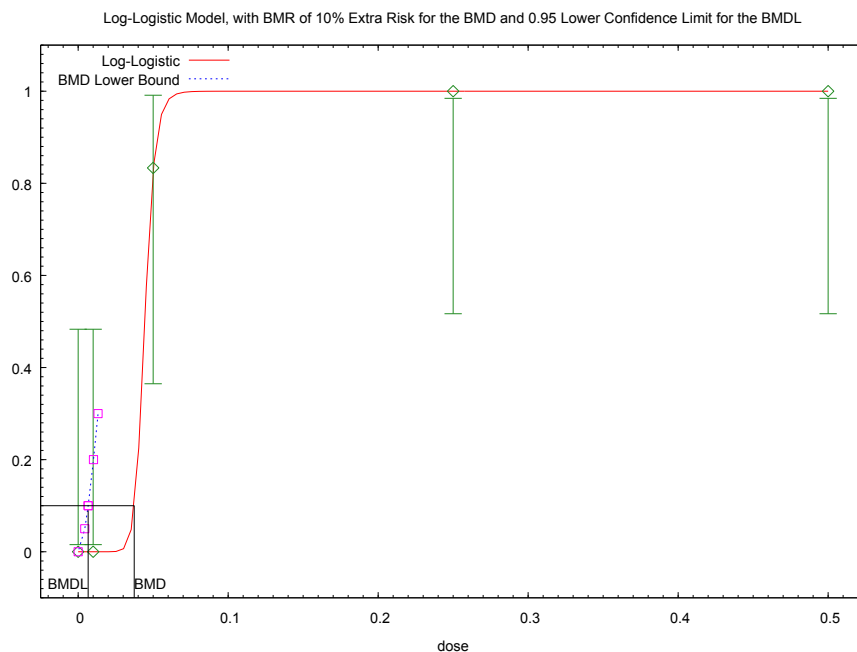

11:37 10/17 2016

```
=====
      Logistic Model. (Version: 2.14; Date: 2/28/2013)
      Input Data File:
      C:/Users/edler/Desktop/BMDS2601_20150629/BMDS2601/Data/lnl_Wu2013DONb_Opt.(d)
      Gnuplot Plotting File:
      C:/Users/edler/Desktop/BMDS2601_20150629/BMDS2601/Data/lnl_Wu2013DONb_Opt.plt
      Mon Oct 17 11:37:52 2016
=====
```

BMDS\_Model\_Run

The form of the probability function is:

$$P[\text{response}] = \text{background} + (1 - \text{background}) / [1 + \text{EXP}(-\text{intercept} - \text{slope} * \text{Log}(\text{dose}))]$$

Dependent variable = Effect  
 Independent variable = Dose  
 Slope parameter is not restricted

Total number of observations = 5  
 Total number of records with missing values = 0  
 Maximum number of iterations = 500  
 Relative Function Convergence has been set to: 1e-008  
 Parameter Convergence has been set to: 1e-008



User has chosen the log transformed model

Default Initial Parameter Values

```
background = 0
intercept = 4.15144
slope = 1.28419
```

Asymptotic Correlation Matrix of Parameter Estimates

( \*\*\* The model parameter(s) -background have been estimated at a boundary point, or have been specified by the user, and do not appear in the correlation matrix )

|           | intercept | slope |
|-----------|-----------|-------|
| intercept | NA        | NA    |
| slope     | NA        | NA    |

NA - This parameter's variance has been estimated as zero or less.  
THE MODEL HAS PROBABLY NOT CONVERGED!!!

Parameter Estimates

| Interval    | Variable   | Estimate | Std. Err. | 95.0% Wald Confidence |       |
|-------------|------------|----------|-----------|-----------------------|-------|
|             |            |          |           | Lower Conf. Limit     | Upper |
| Conf. Limit | background | 0        | NA        |                       |       |
| NA          | intercept  | 40.8212  | NA        | NA                    |       |
| NA          | slope      | 13.0892  | NA        | NA                    |       |

At least some variance estimates are negative.  
THIS USUALLY MEANS THE MODEL HAS NOT CONVERGED!  
Try again from another starting point.

Analysis of Deviance Table

| Model         | Log(likelihood) | # Param's | Deviance     | Test d.f. | P-value |
|---------------|-----------------|-----------|--------------|-----------|---------|
| Full model    | -2.70337        | 5         |              |           |         |
| Fitted model  | -2.70337        | 2         | 4.56654e-008 | 3         | 1       |
| Reduced model | -20.527         | 1         | 35.6472      | 4         | <.0001  |

AIC: 9.40673

Goodness of Fit

| Dose   | Est._Prob. | Expected | Observed | Size  | Scaled Residual |
|--------|------------|----------|----------|-------|-----------------|
| 0.0000 | 0.0000     | 0.000    | 0.000    | 6.000 | 0.000           |
| 0.0100 | 0.0000     | 0.000    | 0.000    | 6.000 | -0.000          |
| 0.0500 | 0.8333     | 5.000    | 5.000    | 6.000 | 0.000           |
| 0.2500 | 1.0000     | 6.000    | 6.000    | 6.000 | 0.000           |
| 0.5000 | 1.0000     | 6.000    | 6.000    | 6.000 | 0.000           |

Chi^2 = 0.00      d.f. = 3      P-value = 1.0000

Benchmark Dose Computation

Specified effect = 0.1  
 Risk Type = Extra risk  
 Confidence level = 0.95  
 BMD = 0.0373825  
 BMDL = 0.00667249

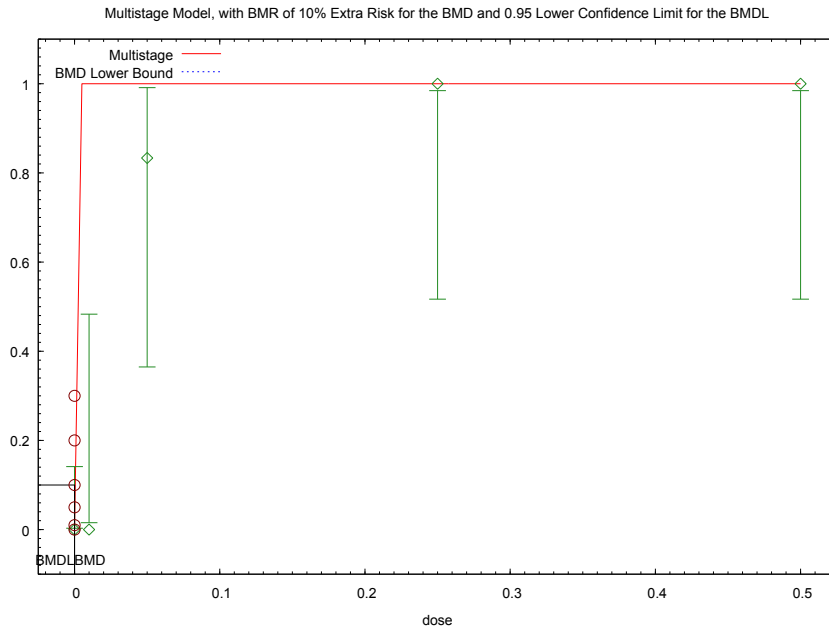

11:39 10/17 2016

```
=====
Multistage Model. (Version: 3.4; Date: 05/02/2014)
Input Data File:
C:/Users/edler/Desktop/BMDS2601_20150629/BMDS2601/Data/mst_Wu2013DON_Opt.(d)
Gnuplot Plotting File:
C:/Users/edler/Desktop/BMDS2601_20150629/BMDS2601/Data/mst_Wu2013DON_Opt.plt
Mon Oct 17 11:39:12 2016
=====
```

BMDS\_Model\_Run

The form of the probability function is:

$$P[\text{response}] = \text{background} + (1-\text{background}) * [1-\text{EXP}(-\text{beta1} * \text{dose}^1 - \text{beta2} * \text{dose}^2)]$$

The parameter betas are not restricted

Dependent variable = Effect  
 Independent variable = Dose

Total number of observations = 5  
 Total number of records with missing values = 0  
 Total number of parameters in model = 3  
 Total number of specified parameters = 0  
 Degree of polynomial = 2

Maximum number of iterations = 500  
 Relative Function Convergence has been set to: 1e-008  
 Parameter Convergence has been set to: 1e-008

Default Initial Parameter Values

Background = 0  
 Beta(1) = 6.04798e+020  
 Beta(2) = -7.64845e+020

Asymptotic Correlation Matrix of Parameter Estimates

( \*\*\* The model parameter(s) -Background  
 have been estimated at a boundary point, or have been specified by  
 the user,  
 and do not appear in the correlation matrix )

|         | Beta(1) | Beta(2) |
|---------|---------|---------|
| Beta(1) | 1       | 0       |
| Beta(2) | 0       | 1       |

Parameter Estimates

| Interval    | Variable   | Estimate     | Std. Err. | 95.0% Wald Confidence |       |
|-------------|------------|--------------|-----------|-----------------------|-------|
|             |            |              |           | Lower Conf. Limit     | Upper |
| Conf. Limit | Background | 0            | NA        |                       |       |
|             | Beta(1)    | 6.04985e+020 | 1         | 6.04985e+020          |       |
|             | Beta(2)    | -7.6491e+020 | 1         | -7.6491e+020          | -     |

NA - Indicates that this parameter has hit a bound implied by some inequality constraint and thus has no standard error.

Analysis of Deviance Table

| Model         | Log(likelihood) | # Param's | Deviance | Test d.f. | P-value |
|---------------|-----------------|-----------|----------|-----------|---------|
| Full model    | -2.70337        | 5         |          |           |         |
| Fitted model  | -4970           | 2         | 9934.59  | 3         | 0       |
| Reduced model | -33.6365        | 1         | 61.8664  | 4         | <.0001  |

AIC: 9944

Goodness of Fit

| Dose   | Est._Prob. | Expected | Observed | Size   | Scaled Residual |
|--------|------------|----------|----------|--------|-----------------|
| 0.0000 | 0.0000     | 0.000    | 0.000    | 30.000 | -0.008          |
| 0.0100 | 1.0000     | 6.000    | 0.000    | 6.000  | -6.000          |
| 0.0500 | 1.0000     | 6.000    | 5.000    | 6.000  | -1.000          |
| 0.2500 | 1.0000     | 6.000    | 6.000    | 6.000  | 0.000           |
| 0.5000 | 1.0000     | 6.000    | 6.000    | 6.000  | 0.000           |

Chi^2 = 37.00      d.f. = 3      P-value = 0.0000



Total number of specified parameters = 0  
 Degree of polynomial = 2

Maximum number of iterations = 500  
 Relative Function Convergence has been set to: 1e-008  
 Parameter Convergence has been set to: 1e-008

Default Initial Parameter Values

Background = 1  
 Beta(1) = 2.31673e+020  
 Beta(2) = 0

Asymptotic Correlation Matrix of Parameter Estimates

( \*\*\* The model parameter(s) -Background -Beta(1)  
 have been estimated at a boundary point, or have been specified by  
 the user,  
 and do not appear in the correlation matrix )  
 Beta(2)  
 Beta(2) 1

Parameter Estimates

|          |            | 95.0% Wald Confidence |           |                   |                   |
|----------|------------|-----------------------|-----------|-------------------|-------------------|
| Interval | Variable   | Estimate              | Std. Err. | Lower Conf. Limit | Upper Conf. Limit |
|          | Background | 0                     | NA        |                   |                   |
|          | Beta(1)    | 0                     | NA        |                   |                   |
| 1276.56  | Beta(2)    | 646.345               | 321.543   | 16.1312           |                   |

NA - Indicates that this parameter has hit a bound implied by some inequality constraint and thus has no standard error.

Analysis of Deviance Table

| Model         | Log(likelihood) | # Param's | Deviance | Test d.f. | P-value |
|---------------|-----------------|-----------|----------|-----------|---------|
| Full model    | -2.70337        | 5         |          |           |         |
| Fitted model  | -3.11139        | 1         | 0.816043 | 4         | 0.9363  |
| Reduced model | -33.6365        | 1         | 61.8664  | 4         | <.0001  |

AIC: 8.22278

Goodness of Fit

| Dose   | Est._Prob. | Expected | Observed | Size   | Scaled Residual |
|--------|------------|----------|----------|--------|-----------------|
| 0.0000 | 0.0000     | 0.000    | 0.000    | 30.000 | 0.000           |
| 0.0100 | 0.0626     | 0.376    | 0.000    | 6.000  | -0.633          |
| 0.0500 | 0.8013     | 4.808    | 5.000    | 6.000  | 0.197           |
| 0.2500 | 1.0000     | 6.000    | 6.000    | 6.000  | 0.000           |
| 0.5000 | 1.0000     | 6.000    | 6.000    | 6.000  | 0.000           |

Chi^2 = 0.44      d.f. = 4      P-value = 0.9791

Benchmark Dose Computation

Specified effect = 0.1  
 Risk Type = Extra risk  
 Confidence level = 0.95  
 BMD = 0.0127675  
 BMDL = 0.00369355  
 BMDU = 0.020009

Taken together, (0.00369355, 0.020009) is a 90 % two-sided confidence interval for the BMD

Cancer Slope Factor = 27.0742

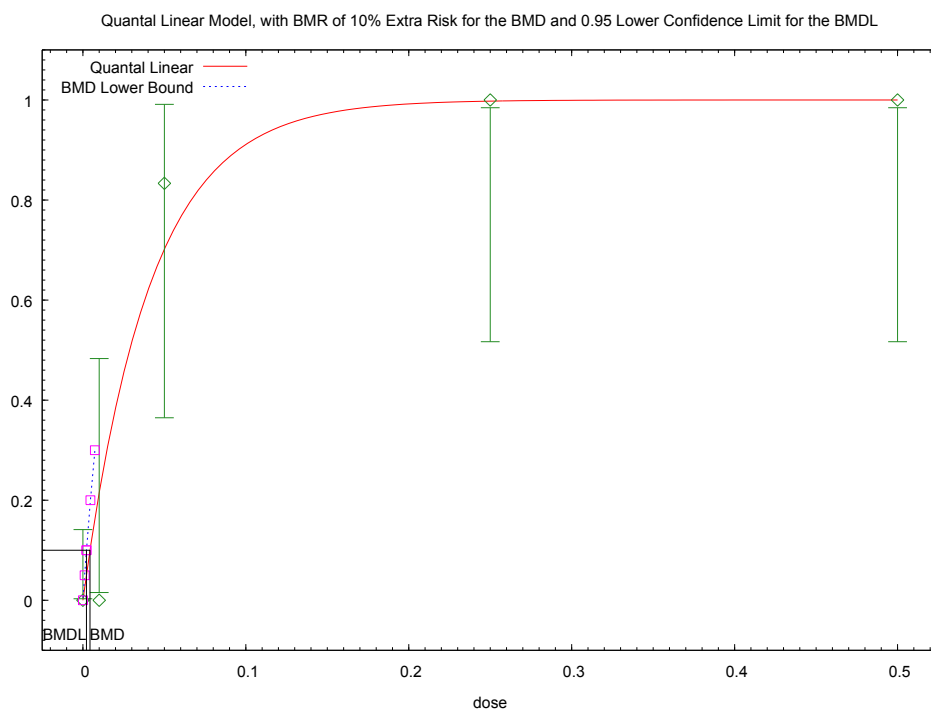

11:40 10/17 2016

```

=====
Quantal Linear Model using Weibull Model (Version: 2.16; Date: 2/28/2013)
Input Data File:
C:/Users/edler/Desktop/BMDS2601_20150629/BMDS2601/Data/qln_Wu2013DON_Opt.(d)
Gnuplot Plotting File:
C:/Users/edler/Desktop/BMDS2601_20150629/BMDS2601/Data/qln_Wu2013DON_Opt.plt
Mon Oct 17 11:40:55 2016
=====
    
```

BMDS\_Model\_Run  
 ~~~~~

The form of the probability function is:

$$P[\text{response}] = \text{background} + (1-\text{background}) * [1-\text{EXP}(-\text{slope} * \text{dose})]$$

Dependent variable = Effect  
 Independent variable = Dose

Total number of observations = 5  
 Total number of records with missing values = 0  
 Maximum number of iterations = 500  
 Relative Function Convergence has been set to: 1e-008  
 Parameter Convergence has been set to: 1e-008

Default Initial (and Specified) Parameter Values  
 Background = 0.03125  
 Slope = 4.09539  
 Power = 1 Specified

Asymptotic Correlation Matrix of Parameter Estimates

( \*\*\* The model parameter(s) -Background -Power  
 have been estimated at a boundary point, or have been specified by  
 the user,  
 and do not appear in the correlation matrix )  
 Slope  
 Slope 1

Parameter Estimates

|             |            | 95.0% Wald Confidence |           |                   |       |
|-------------|------------|-----------------------|-----------|-------------------|-------|
| Interval    | Variable   | Estimate              | Std. Err. | Lower Conf. Limit | Upper |
| Conf. Limit | Background | 0                     | NA        |                   |       |
| 45.4486     | Slope      | 24.1749               | 10.8541   | 2.90119           |       |

NA - Indicates that this parameter has hit a bound implied by some inequality constraint and thus has no standard error.

Analysis of Deviance Table

| Model         | Log(likelihood) | # Param's | Deviance | Test d.f. | P-value |
|---------------|-----------------|-----------|----------|-----------|---------|
| Full model    | -2.70337        | 5         |          |           |         |
| Fitted model  | -4.44671        | 1         | 3.48668  | 4         | 0.4799  |
| Reduced model | -33.6365        | 1         | 61.8664  | 4         | <.0001  |

AIC: 10.8934

Goodness of Fit

| Dose   | Est._Prob. | Expected | Observed | Size   | Scaled Residual |
|--------|------------|----------|----------|--------|-----------------|
| 0.0000 | 0.0000     | 0.000    | 0.000    | 30.000 | 0.000           |
| 0.0100 | 0.2147     | 1.288    | 0.000    | 6.000  | -1.281          |
| 0.0500 | 0.7014     | 4.209    | 5.000    | 6.000  | 0.706           |
| 0.2500 | 0.9976     | 5.986    | 6.000    | 6.000  | 0.119           |
| 0.5000 | 1.0000     | 6.000    | 6.000    | 6.000  | 0.006           |

Chi^2 = 2.15      d.f. = 4      P-value = 0.7075

Benchmark Dose Computation

Specified effect = 0.1  
 Risk Type = Extra risk  
 Confidence level = 0.95  
 BMD = 0.00435826  
 BMDL = 0.00217173

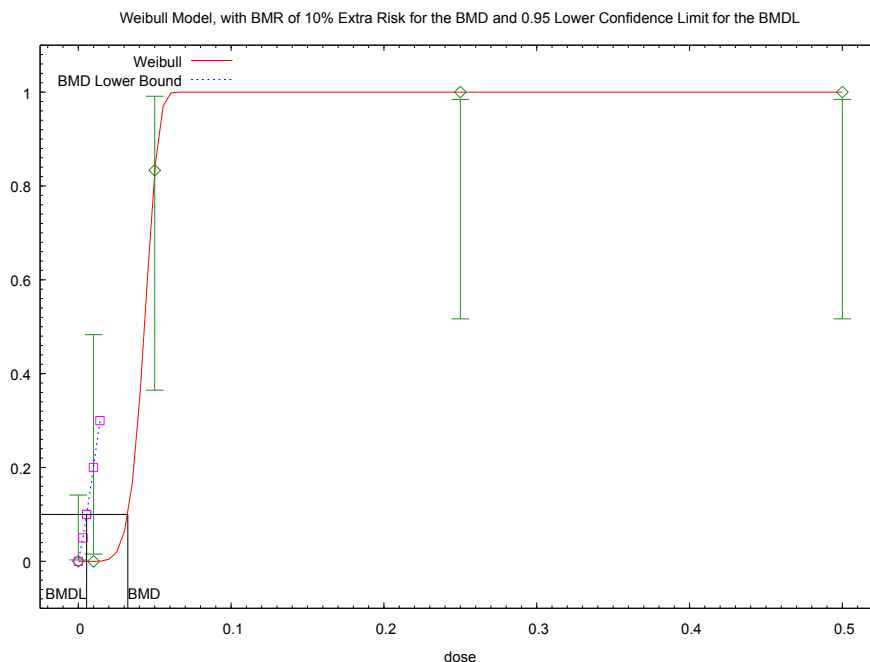

11:41 10/17 2016

```
=====
Weibull Model using Weibull Model (Version: 2.16; Date: 2/28/2013)
Input Data File:
C:/Users/edler/Desktop/BMDS2601_20150629/BMDS2601/Data/wei_Wu2013DON_Opt.(d)
Gnuplot Plotting File:
C:/Users/edler/Desktop/BMDS2601_20150629/BMDS2601/Data/wei_Wu2013DON_Opt.plt
Mon Oct 17 11:41:52 2016
=====
```

BMDS\_Model\_Run

The form of the probability function is:

$$P[\text{response}] = \text{background} + (1-\text{background}) * [1-\text{EXP}(-\text{slope} * \text{dose}^{\text{power}})]$$

Dependent variable = Effect  
 Independent variable = Dose  
 Power parameter is not restricted

Total number of observations = 5  
 Total number of records with missing values = 0  
 Maximum number of iterations = 500  
 Relative Function Convergence has been set to: 1e-008  
 Parameter Convergence has been set to: 1e-008

Default Initial (and Specified) Parameter Values



Background = 0.03125  
 Slope = 2.81431  
 Power = 0.458784

Asymptotic Correlation Matrix of Parameter Estimates

( \*\*\* The model parameter(s) -Background have been estimated at a boundary point, or have been specified by the user, and do not appear in the correlation matrix )

|       | Slope | Power |
|-------|-------|-------|
| Slope | 1     | 1     |
| Power | 1     | 1     |

Parameter Estimates

|              |            | 95.0% Wald Confidence |              |                   |                   |
|--------------|------------|-----------------------|--------------|-------------------|-------------------|
| Interval     | Variable   | Estimate              | Std. Err.    | Lower Conf. Limit | Upper Conf. Limit |
|              | Background | 0                     | NA           |                   |                   |
| 7.72159e+010 | Slope      | 5.71235e+008          | 3.91051e+010 | -7.60734e+010     |                   |
| 51.3227      | Power      | 6.53604               | 22.8508      | -38.2506          |                   |

NA - Indicates that this parameter has hit a bound implied by some inequality constraint and thus has no standard error.

Analysis of Deviance Table

| Model         | Log(likelihood) | # Param's | Deviance    | Test d.f. | P-value |
|---------------|-----------------|-----------|-------------|-----------|---------|
| Full model    | -2.70337        | 5         |             |           |         |
| Fitted model  | -2.70366        | 2         | 0.000580701 | 3         | 1       |
| Reduced model | -33.6365        | 1         | 61.8664     | 4         | <.0001  |
| AIC:          | 9.40732         |           |             |           |         |

Goodness of Fit

| Dose   | Est._Prob. | Expected | Observed | Size   | Scaled Residual |
|--------|------------|----------|----------|--------|-----------------|
| 0.0000 | 0.0000     | 0.000    | 0.000    | 30.000 | 0.000           |
| 0.0100 | 0.0000     | 0.000    | 0.000    | 6.000  | -0.017          |
| 0.0500 | 0.8333     | 5.000    | 5.000    | 6.000  | 0.000           |
| 0.2500 | 1.0000     | 6.000    | 6.000    | 6.000  | 0.000           |
| 0.5000 | 1.0000     | 6.000    | 6.000    | 6.000  | 0.000           |

Chi^2 = 0.00      d.f. = 3      P-value = 1.0000

Benchmark Dose Computation

Specified effect = 0.1  
 Risk Type = Extra risk  
 Confidence level = 0.95

BMD = 0.0324114

BMDL = 0.00546056

### Supplementary information for WUDON3AC (Wu et al., 2013a)

Details of the BMD Analysis of concentration-response data for vomiting in mink of Wu et al. (2013) reported in Appendix G, Section G.4.3.2 of the Scientific Opinion on the risks to human and animal health related to the presence of deoxynivalenol and its acetylated and modified forms in food and feed - for 3-Ac-DON

Filename: WuDON3Ac

Folder: Mink

Output from BMDS from 19 Oct 2016 with the full information of the fit of all models of BMDS where a model fit was obtained in a reasonable duration of computing time.

The output is ordered in the sequence used in the Table G18 shown in Appendix G which is based on an order of increasing mathematical complexity. The two less complex multistage models are nested under the multistage model which was used with the default assumption of the degree of the polynomial of BMDS.

Occasionally, it was not possible to obtain the results of the Gamma model with the notebook used for the calculation HP844op or Lenovo 3508. This was the case for the data of 3-Ac-DON. The Gamma model failed without any output. The Multistage model run but was considered to failed since a statistically impossible p-value of 2 was recorded.

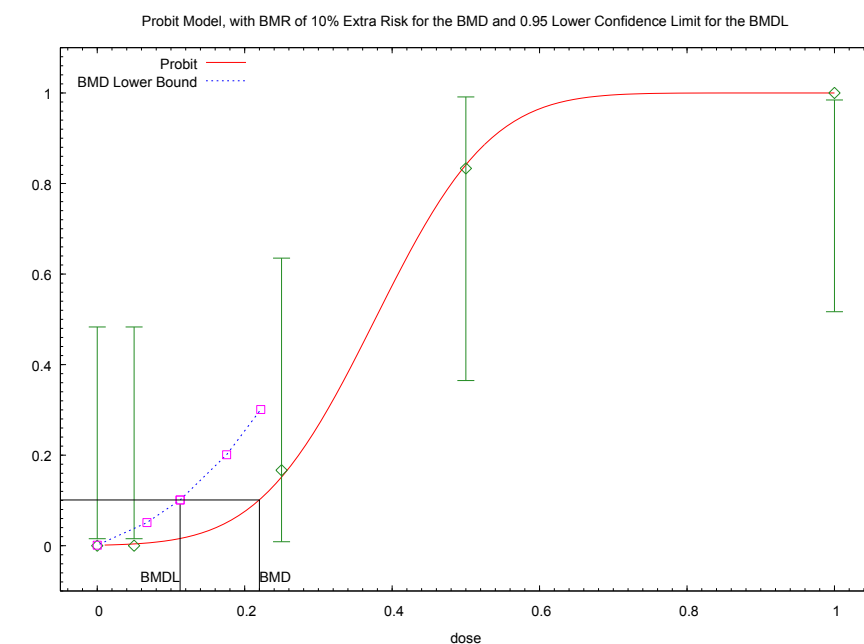

```
=====
Probit Model. (Version: 3.3; Date: 2/28/2013)
Input Data File:
C:/Users/edler/Desktop/BMDS2601_20150629/BMDS2601/Data/pro_Wu2013-3AcDONb_Opt. (d)
Gnuplot Plotting File:
C:/Users/edler/Desktop/BMDS2601_20150629/BMDS2601/Data/pro_Wu2013-3AcDONb_Opt.plt
Mon Oct 17 17:29:49 2016
=====
```

BMDS\_Model\_Run

The form of the probability function is:

$$P[\text{response}] = \text{CumNorm}(\text{Intercept} + \text{Slope} * \text{Dose}),$$

where CumNorm(.) is the cumulative normal distribution function

Dependent variable = Effect  
 Independent variable = Dose  
 Slope parameter is not restricted

Total number of observations = 5  
 Total number of records with missing values = 0  
 Maximum number of iterations = 500  
 Relative Function Convergence has been set to: 1e-008  
 Parameter Convergence has been set to: 1e-008

Default Initial (and Specified) Parameter Values  
 background = 0 Specified  
 intercept = -1.82112  
 slope = 3.90837

Asymptotic Correlation Matrix of Parameter Estimates

( \*\*\* The model parameter(s) -background  
 have been estimated at a boundary point, or have been specified by  
 the user,  
 and do not appear in the correlation matrix )

|           | intercept | slope |
|-----------|-----------|-------|
| intercept | 1         | -0.93 |
| slope     | -0.93     | 1     |

Parameter Estimates

| Interval    | Variable  | Estimate | Std. Err. | 95.0% Wald Confidence |       |
|-------------|-----------|----------|-----------|-----------------------|-------|
|             |           |          |           | Lower Conf. Limit     | Upper |
| Conf. Limit | intercept | -3.0611  | 1.16433   | -5.34315              | -     |
| 0.779053    | slope     | 8.11591  | 3.00731   | 2.22169               |       |
| 14.0101     |           |          |           |                       |       |

Analysis of Deviance Table

| Model         | Log(likelihood) | # Param's | Deviance  | Test d.f. | P-value |
|---------------|-----------------|-----------|-----------|-----------|---------|
| Full model    | -5.40673        | 5         |           |           |         |
| Fitted model  | -5.44392        | 2         | 0.0743692 | 3         | 0.9947  |
| Reduced model | -20.1904        | 1         | 29.5672   | 4         | <.0001  |
| AIC:          | 14.8878         |           |           |           |         |

Goodness of Fit

| Dose   | Est._Prob. | Expected | Observed | Size  | Scaled Residual |
|--------|------------|----------|----------|-------|-----------------|
| 0.0000 | 0.0011     | 0.007    | 0.000    | 6.000 | -0.081          |
| 0.0500 | 0.0040     | 0.024    | 0.000    | 6.000 | -0.154          |
| 0.2500 | 0.1510     | 0.906    | 1.000    | 6.000 | 0.107           |
| 0.5000 | 0.8406     | 5.043    | 5.000    | 6.000 | -0.049          |
| 1.0000 | 1.0000     | 6.000    | 6.000    | 6.000 | 0.001           |

Chi<sup>2</sup> = 0.04      d.f. = 3      P-value = 0.9976

Benchmark Dose Computation

Specified effect = 0.1  
 Risk Type = Extra risk  
 Confidence level = 0.95  
 BMD = 0.219961  
 BMDL = 0.112409

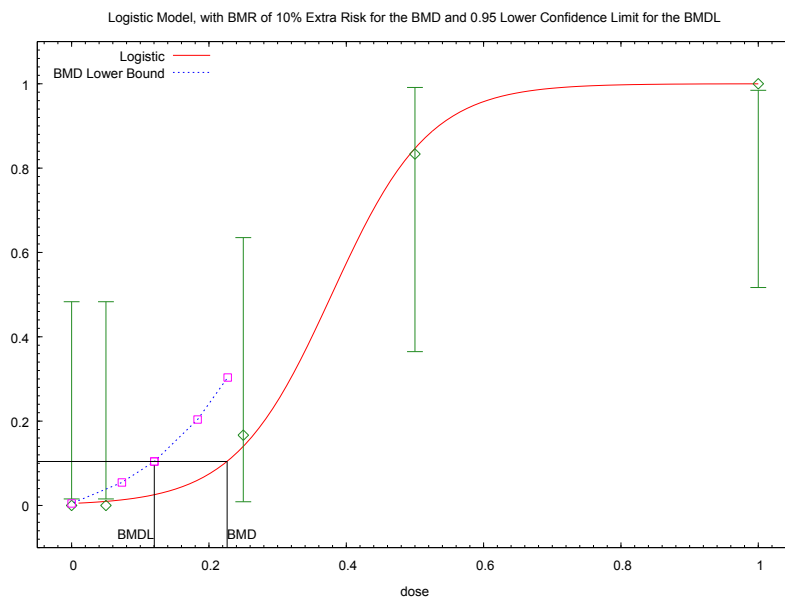

17:34 10/17 2016

```
=====
      Logistic Model. (Version: 2.14; Date: 2/28/2013)
      Input Data File:
      C:/Users/edler/Desktop/BMDS2601_20150629/BMDS2601/Data/log_Wu2013-3AcDONb_Opt. (d)
      Gnuplot Plotting File:
      C:/Users/edler/Desktop/BMDS2601_20150629/BMDS2601/Data/log_Wu2013-3AcDONb_Opt.plt
      Mon Oct 17 17:34:55 2016
=====
```

BMDS\_Model\_Run

The form of the probability function is:

$$P[\text{response}] = 1/[1+\text{EXP}(-\text{intercept}-\text{slope}*\text{dose})]$$

Dependent variable = Effect  
 Independent variable = Dose  
 Slope parameter is not restricted

Total number of observations = 5  
 Total number of records with missing values = 0  
 Maximum number of iterations = 500  
 Relative Function Convergence has been set to: 1e-008  
 Parameter Convergence has been set to: 1e-008

Default Initial Parameter Values  
background = 0 Specified  
intercept = -2.50184  
slope = 5.52459

Asymptotic Correlation Matrix of Parameter Estimates

( \*\*\* The model parameter(s) -background have been estimated at a boundary point, or have been specified by the user, and do not appear in the correlation matrix )

|           | intercept | slope |
|-----------|-----------|-------|
| intercept | 1         | -0.93 |
| slope     | -0.93     | 1     |

Parameter Estimates

| Interval    | Variable  | Estimate | Std. Err. | 95.0% Wald Confidence |       |
|-------------|-----------|----------|-----------|-----------------------|-------|
|             |           |          |           | Lower Conf. Limit     | Upper |
| Conf. Limit | intercept | -5.34289 | 2.12811   | -9.51391              | -     |
| 1.17188     | slope     | 14.0965  | 5.45861   | 3.39782               |       |
| 24.7952     |           |          |           |                       |       |

Analysis of Deviance Table

| Model         | Log(likelihood) | # Param's | Deviance | Test d.f. | P-value |
|---------------|-----------------|-----------|----------|-----------|---------|
| Full model    | -5.40673        | 5         |          |           |         |
| Fitted model  | -5.51526        | 2         | 0.217047 | 3         | 0.9748  |
| Reduced model | -20.1904        | 1         | 29.5672  | 4         | <.0001  |
| AIC:          | 15.0305         |           |          |           |         |

Goodness of Fit

| Dose   | Est._Prob. | Expected | Observed | Size  | Scaled Residual |
|--------|------------|----------|----------|-------|-----------------|
| 0.0000 | 0.0048     | 0.029    | 0.000    | 6.000 | -0.169          |
| 0.0500 | 0.0096     | 0.058    | 0.000    | 6.000 | -0.241          |
| 0.2500 | 0.1396     | 0.837    | 1.000    | 6.000 | 0.191           |
| 0.5000 | 0.8462     | 5.077    | 5.000    | 6.000 | -0.088          |
| 1.0000 | 0.9998     | 5.999    | 6.000    | 6.000 | 0.031           |

Chi^2 = 0.13      d.f. = 3      P-value = 0.9877

Benchmark Dose Computation

Specified effect = 0.1  
Risk Type = Extra risk  
Confidence level = 0.95  
BMD = 0.226466  
BMDL = 0.120421

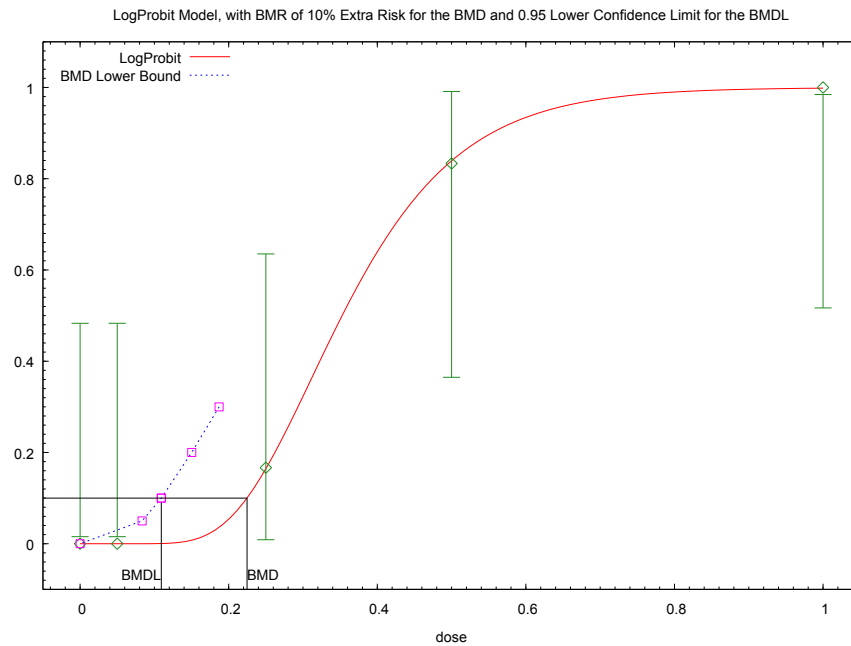

```

=====
      Probit Model. (Version: 3.3; Date: 2/28/2013)
      Input Data File:
C:/Users/edler/Desktop/BMDS2601_20150629/BMDS2601/Data/lnp_Wu2013-3AcDONb_Opt. (d)
      Gnuplot Plotting File:
C:/Users/edler/Desktop/BMDS2601_20150629/BMDS2601/Data/lnp_Wu2013-3AcDONb_Opt.plt
      Mon Oct 17 17:36:45 2016
=====
  
```

BMDS\_Model\_Run

The form of the probability function is:

$$P[\text{response}] = \text{Background} + (1 - \text{Background}) * \text{CumNorm}(\text{Intercept} + \text{Slope} * \text{Log}(\text{Dose})),$$

where CumNorm(.) is the cumulative normal distribution function

Dependent variable = Effect  
 Independent variable = Dose  
 Slope parameter is not restricted

Total number of observations = 5  
 Total number of records with missing values = 0  
 Maximum number of iterations = 500  
 Relative Function Convergence has been set to: 1e-008  
 Parameter Convergence has been set to: 1e-008

User has chosen the log transformed model

```

Default Initial (and Specified) Parameter Values
background = 0
intercept = 1.30032
slope = 1.02485
  
```

Asymptotic Correlation Matrix of Parameter Estimates

( \*\*\* The model parameter(s) -background have been estimated at a boundary point, or have been specified by the user, and do not appear in the correlation matrix )

|           | intercept | slope |
|-----------|-----------|-------|
| intercept | 1         | 0.94  |
| slope     | 0.94      | 1     |

Parameter Estimates

| Interval    | Variable   | Estimate | Std. Err. | 95.0% Wald Confidence |       |
|-------------|------------|----------|-----------|-----------------------|-------|
| Conf. Limit |            |          |           | Lower                 | Upper |
|             | background | 0        | NA        |                       |       |
| 5.44123     | intercept  | 2.95845  | 1.26675   | 0.475665              |       |
| 5.12227     | slope      | 2.84     | 1.16444   | 0.557738              |       |

NA - Indicates that this parameter has hit a bound implied by some inequality constraint and thus has no standard error.

Analysis of Deviance Table

| Model         | Log(likelihood) | # Param's | Deviance  | Test d.f. | P-value |
|---------------|-----------------|-----------|-----------|-----------|---------|
| Full model    | -5.40673        | 5         |           |           |         |
| Fitted model  | -5.41687        | 2         | 0.0202628 | 3         | 0.9992  |
| Reduced model | -20.1904        | 1         | 29.5672   | 4         | <.0001  |
| AIC:          | 14.8337         |           |           |           |         |

Goodness of Fit

| Dose   | Est._Prob. | Expected | Observed | Size  | Scaled Residual |
|--------|------------|----------|----------|-------|-----------------|
| 0.0000 | 0.0000     | 0.000    | 0.000    | 6.000 | 0.000           |
| 0.0500 | 0.0000     | 0.000    | 0.000    | 6.000 | -0.000          |
| 0.2500 | 0.1639     | 0.983    | 1.000    | 6.000 | 0.018           |
| 0.5000 | 0.8389     | 5.033    | 5.000    | 6.000 | -0.037          |
| 1.0000 | 0.9985     | 5.991    | 6.000    | 6.000 | 0.096           |

Chi^2 = 0.01      d.f. = 3      P-value = 0.9997

Benchmark Dose Computation

Specified effect = 0.1  
 Risk Type = Extra risk  
 Confidence level = 0.95  
 BMD = 0.224708  
 BMDL = 0.109274



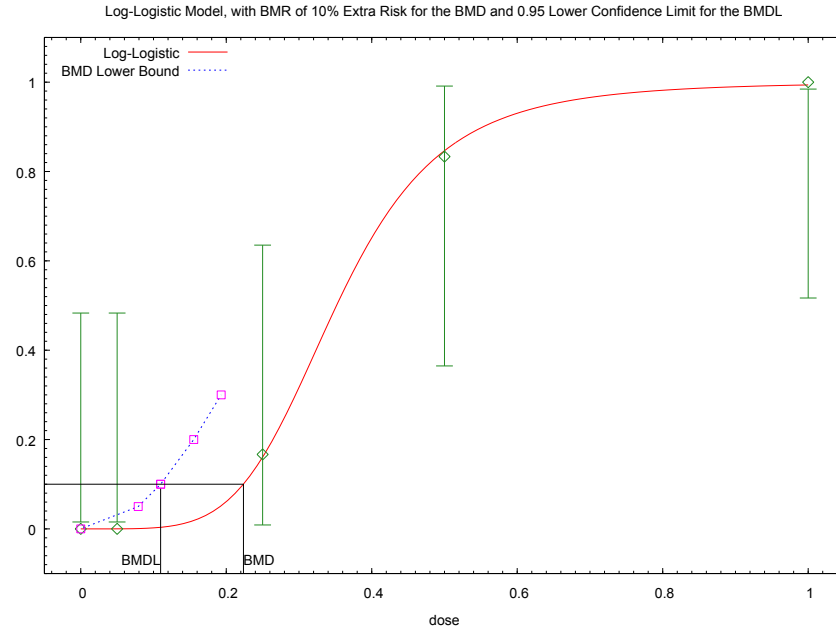

17:38 10/17 2016

```

=====
      Logistic Model. (Version: 2.14; Date: 2/28/2013)
      Input Data File:
C:/Users/edler/Desktop/BMDS2601_20150629/BMDS2601/Data/lnl_Wu2013-3AcDONb_Opt. (d)
      Gnuplot Plotting File:
C:/Users/edler/Desktop/BMDS2601_20150629/BMDS2601/Data/lnl_Wu2013-3AcDONb_Opt.plt
                                          Mon Oct 17 17:38:39 2016
=====
  
```

BMDS\_Model\_Run

The form of the probability function is:

$$P[\text{response}] = \text{background} + (1 - \text{background}) / [1 + \text{EXP}(-\text{intercept} - \text{slope} * \text{Log}(\text{dose}))]$$

Dependent variable = Effect  
 Independent variable = Dose  
 Slope parameter is not restricted

Total number of observations = 5  
 Total number of records with missing values = 0  
 Maximum number of iterations = 500  
 Relative Function Convergence has been set to: 1e-008  
 Parameter Convergence has been set to: 1e-008

User has chosen the log transformed model

```

      Default Initial Parameter Values
      background =          0
      intercept =    2.26129
      slope =          1.78223
  
```

Asymptotic Correlation Matrix of Parameter Estimates

( \*\*\* The model parameter(s) -background

the user, have been estimated at a boundary point, or have been specified by  
and do not appear in the correlation matrix )

|           |           |       |
|-----------|-----------|-------|
|           | intercept | slope |
| intercept | 1         | 0.94  |
| slope     | 0.94      | 1     |

Parameter Estimates

|             |            | 95.0% Wald Confidence |           |                   |       |
|-------------|------------|-----------------------|-----------|-------------------|-------|
| Interval    | Variable   | Estimate              | Std. Err. | Lower Conf. Limit | Upper |
| Conf. Limit | background | 0                     | NA        |                   |       |
| 9.49414     | intercept  | 5.06531               | 2.25965   | 0.636483          |       |
| 8.91426     | slope      | 4.8493                | 2.074     | 0.784331          |       |

NA - Indicates that this parameter has hit a bound implied by some inequality constraint and thus has no standard error.

Analysis of Deviance Table

| Model         | Log(likelihood) | # Param's | Deviance  | Test d.f. | P-value |
|---------------|-----------------|-----------|-----------|-----------|---------|
| Full model    | -5.40673        | 5         |           |           |         |
| Fitted model  | -5.44955        | 2         | 0.0856239 | 3         | 0.9935  |
| Reduced model | -20.1904        | 1         | 29.5672   | 4         | <.0001  |
| AIC:          | 14.8991         |           |           |           |         |

Goodness of Fit

| Dose   | Est._Prob. | Expected | Observed | Size  | Scaled Residual |
|--------|------------|----------|----------|-------|-----------------|
| 0.0000 | 0.0000     | 0.000    | 0.000    | 6.000 | 0.000           |
| 0.0500 | 0.0001     | 0.000    | 0.000    | 6.000 | -0.022          |
| 0.2500 | 0.1601     | 0.961    | 1.000    | 6.000 | 0.044           |
| 0.5000 | 0.8461     | 5.076    | 5.000    | 6.000 | -0.086          |
| 1.0000 | 0.9937     | 5.962    | 6.000    | 6.000 | 0.195           |

Chi^2 = 0.05      d.f. = 3      P-value = 0.9973

Benchmark Dose Computation

Specified effect = 0.1  
 Risk Type = Extra risk  
 Confidence level = 0.95  
 BMD = 0.223656  
 BMDL = 0.109804

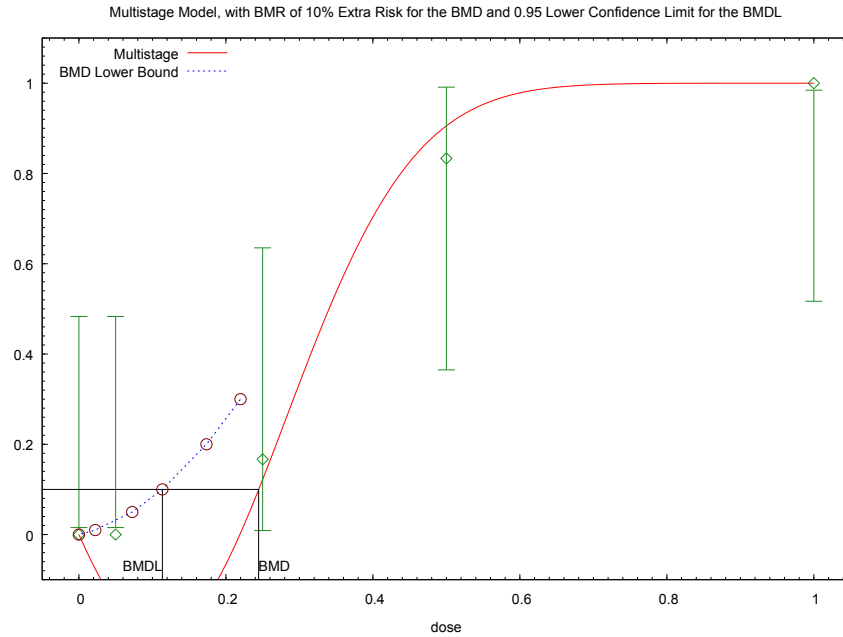

```

=====
Multistage Model. (Version: 3.4; Date: 05/02/2014)
Input Data File:
C:/Users/edler/Desktop/BMDS2601_20150629/BMDS2601/Data/mst_Wu2013-3AcDONb_Opt. (d)
Gnuplot Plotting File:
C:/Users/edler/Desktop/BMDS2601_20150629/BMDS2601/Data/mst_Wu2013-3AcDONb_Opt.plt
Mon Oct 17 17:40:08 2016
=====

```

```

BMDS_Model_Run
~~~~~

```

The form of the probability function is:

$$P[\text{response}] = \text{background} + (1-\text{background}) * [1-\text{EXP}(-\text{beta1} * \text{dose}^{\text{beta2}})]$$

The parameter betas are not restricted

Dependent variable = Effect  
 Independent variable = Dose

```

Total number of observations = 5
Total number of records with missing values = 0
Total number of parameters in model = 3
Total number of specified parameters = 0
Degree of polynomial = 2

```

```

Maximum number of iterations = 500
Relative Function Convergence has been set to: 1e-008
Parameter Convergence has been set to: 1e-008

```

```

Default Initial Parameter Values
Background = 1
Beta(1) = -8.69869e+019
Beta(2) = 1.82843e+020

```

Asymptotic Correlation Matrix of Parameter Estimates

( \*\*\* The model parameter(s) -Background have been estimated at a boundary point, or have been specified by the user, and do not appear in the correlation matrix )

|         | Beta(1) | Beta(2) |
|---------|---------|---------|
| Beta(1) | 1       | -0.98   |
| Beta(2) | -0.98   | 1       |

Parameter Estimates

| Interval | Variable   | Estimate | Std. Err. | 95.0% Wald Confidence Lower Conf. Limit | Upper |
|----------|------------|----------|-----------|-----------------------------------------|-------|
|          | Background | 0        | NA        |                                         |       |
| 1.84608  | Beta(1)    | -3.679   | 2.81897   | -9.20408                                |       |
| 37.7586  | Beta(2)    | 16.8077  | 10.6894   | -4.1432                                 |       |

NA - Indicates that this parameter has hit a bound implied by some inequality constraint and thus has no standard error.

Warning: Likelihood for the fitted model larger than the Likelihood for the full model.

Error in computing chi-square; returning 2

Analysis of Deviance Table

| Model         | Log(likelihood) | # Param's | Deviance | Test d.f. | P-value |
|---------------|-----------------|-----------|----------|-----------|---------|
| Full model    | -5.40673        | 5         |          |           |         |
| Fitted model  | -4.75841        | 2         | -1.29665 | 3         | 2       |
| Reduced model | -20.1904        | 1         | 29.5672  | 4         | <.0001  |
| AIC:          | 13.5168         |           |          |           |         |

Goodness of Fit

| Dose   | Est._Prob. | Expected | Observed | Size  | Scaled Residual |
|--------|------------|----------|----------|-------|-----------------|
| 0.0000 | 0.0000     | 0.000    | 0.000    | 6.000 | 0.000           |
| 0.0500 | -0.1525    | -0.915   | 0.000    | 6.000 | 0.915           |
| 0.2500 | 0.1225     | 0.735    | 1.000    | 6.000 | 0.330           |
| 0.5000 | 0.9058     | 5.435    | 5.000    | 6.000 | -0.608          |
| 1.0000 | 1.0000     | 6.000    | 6.000    | 6.000 | 0.003           |

Chi^2 = 1.32      d.f. = 3      P-value = 0.7255

Benchmark Dose Computation

Specified effect = 0.1  
 Risk Type = Extra risk  
 Confidence level = 0.95  
 BMD = 0.244523

BMDL = 0.113603  
 BMDU = 0.27287

Taken together, (0.113603, 0.27287) is a 90 % two-sided confidence interval for the BMD

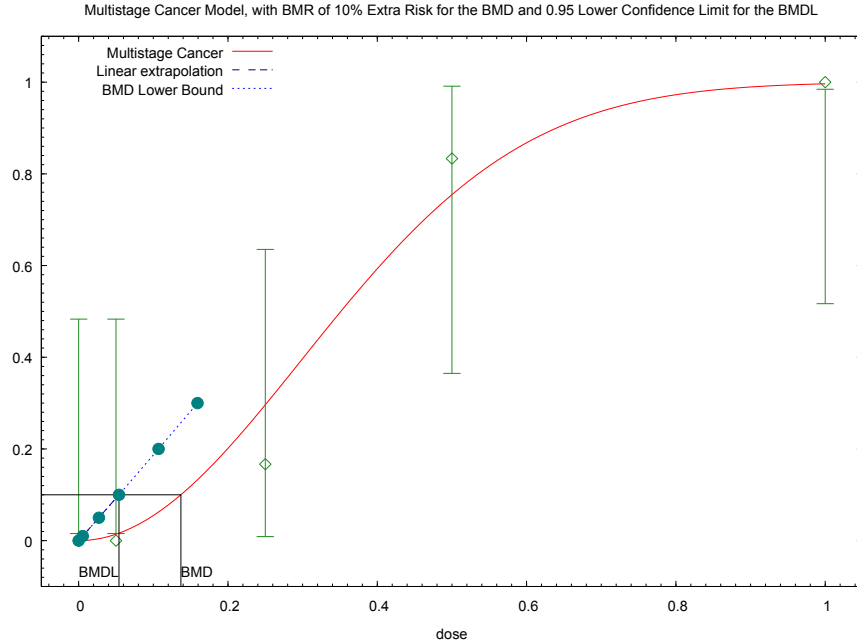

17:42 10/17 2016

```
=====
Multistage Model. (Version: 3.4; Date: 05/02/2014)
Input Data File:
C:/Users/edler/Desktop/BMDS2601_20150629/BMDS2601/Data/msc_Wu2013-3AcDONb_Opt.(d)
Gnuplot Plotting File:
C:/Users/edler/Desktop/BMDS2601_20150629/BMDS2601/Data/msc_Wu2013-3AcDONb_Opt.plt
Mon Oct 17 17:42:48 2016
=====
```

BMDS\_Model\_Run

The form of the probability function is:

$$P[\text{response}] = \text{background} + (1-\text{background}) * [1 - \text{EXP}(-\text{beta1} * \text{dose}^{1-\text{beta2}} * \text{dose}^2)]$$

The parameter betas are restricted to be positive

Dependent variable = Effect  
 Independent variable = Dose

Total number of observations = 5  
 Total number of records with missing values = 0  
 Total number of parameters in model = 3  
 Total number of specified parameters = 0  
 Degree of polynomial = 2

Maximum number of iterations = 500  
 Relative Function Convergence has been set to: 1e-008  
 Parameter Convergence has been set to: 1e-008

Default Initial Parameter Values

Background = 0  
 Beta(1) = 0  
 Beta(2) = 1.0228e+020

Asymptotic Correlation Matrix of Parameter Estimates

( \*\*\* The model parameter(s) -Background -Beta(1) have been estimated at a boundary point, or have been specified by the user, and do not appear in the correlation matrix )

Beta(2)  
 Beta(2) 1

Parameter Estimates

95.0% Wald Confidence

| Interval    | Variable   | Estimate | Std. Err. | Lower Conf. Limit | Upper |
|-------------|------------|----------|-----------|-------------------|-------|
| Conf. Limit | Background | 0        | NA        |                   |       |
|             | Beta(1)    | 0        | NA        |                   |       |
| 10.1336     | Beta(2)    | 5.61613  | 2.30489   | 1.09863           |       |

NA - Indicates that this parameter has hit a bound implied by some inequality constraint and thus has no standard error.

Analysis of Deviance Table

| Model         | Log(likelihood) | # Param's | Deviance | Test d.f. | P-value |
|---------------|-----------------|-----------|----------|-----------|---------|
| Full model    | -5.40673        | 5         |          |           |         |
| Fitted model  | -5.8917         | 1         | 0.969934 | 4         | 0.9143  |
| Reduced model | -20.1904        | 1         | 29.5672  | 4         | <.0001  |
| AIC:          | 13.7834         |           |          |           |         |

Goodness of Fit

| Dose   | Est._Prob. | Expected | Observed | Size  | Scaled Residual |
|--------|------------|----------|----------|-------|-----------------|
| 0.0000 | 0.0000     | 0.000    | 0.000    | 6.000 | 0.000           |
| 0.0500 | 0.0139     | 0.084    | 0.000    | 6.000 | -0.291          |
| 0.2500 | 0.2960     | 1.776    | 1.000    | 6.000 | -0.694          |
| 0.5000 | 0.7544     | 4.526    | 5.000    | 6.000 | 0.449           |
| 1.0000 | 0.9964     | 5.978    | 6.000    | 6.000 | 0.148           |

Chi^2 = 0.79      d.f. = 4      P-value = 0.9397

Benchmark Dose Computation

Specified effect = 0.1  
 Risk Type = Extra risk  
 Confidence level = 0.95  
 BMD = 0.136968

BMDL = 0.0540174  
 BMDU = 0.193732

Taken together, (0.0540174, 0.193732) is a 90 % two-sided confidence interval for the BMD

Cancer Slope Factor = 1.85126

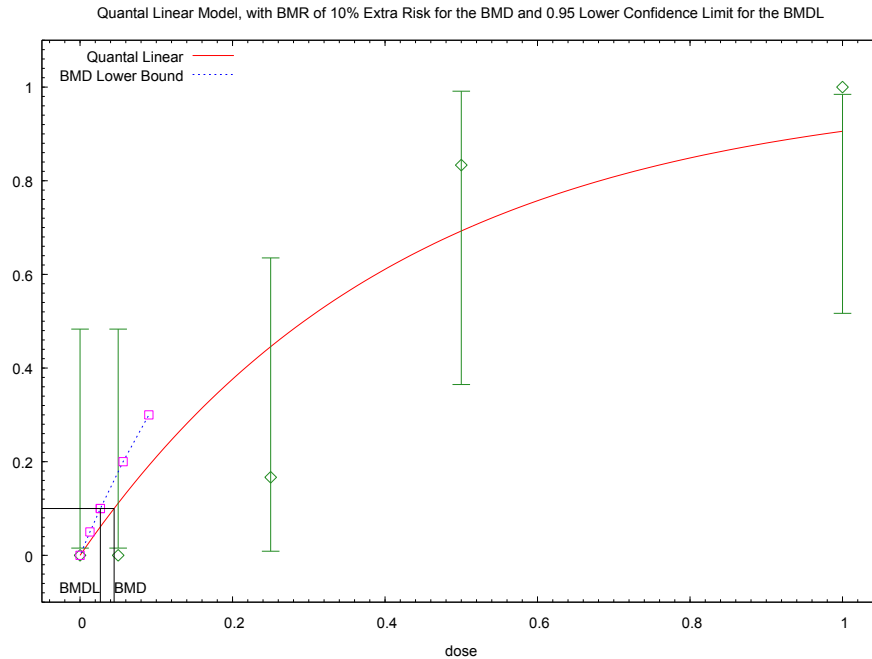

17:45 10/17 2016

```
=====
Quantal Linear Model using Weibull Model (Version: 2.16; Date: 2/28/2013)
Input Data File:
C:/Users/edler/Desktop/BMDS2601_20150629/BMDS2601/Data/qln_Wu2013-3AcDONb_Opt. (d)
Gnuplot Plotting File:
C:/Users/edler/Desktop/BMDS2601_20150629/BMDS2601/Data/qln_Wu2013-3AcDONb_Opt.plt
Mon Oct 17 17:45:28 2016
=====
```

```
BMDS_Model_Run
~~~~~
```

The form of the probability function is:

$$P[\text{response}] = \text{background} + (1 - \text{background}) * [1 - \text{EXP}(-\text{slope} * \text{dose})]$$

Dependent variable = Effect  
 Independent variable = Dose

Total number of observations = 5  
 Total number of records with missing values = 0  
 Maximum number of iterations = 500  
 Relative Function Convergence has been set to: 1e-008  
 Parameter Convergence has been set to: 1e-008

Default Initial (and Specified) Parameter Values  
 Background = 0.125

Slope = 1.94591  
 Power = 1 Specified

Asymptotic Correlation Matrix of Parameter Estimates

( \*\*\* The model parameter(s) -Background -Power  
 have been estimated at a boundary point, or have been specified by  
 the user,  
 and do not appear in the correlation matrix )

Slope  
 Slope 1

Parameter Estimates

|             |            | 95.0% Wald Confidence |           |                   |       |
|-------------|------------|-----------------------|-----------|-------------------|-------|
| Interval    | Variable   | Estimate              | Std. Err. | Lower Conf. Limit | Upper |
| Conf. Limit | Background | 0                     | NA        |                   |       |
|             | Slope      | 2.3573                | 0.773732  | 0.840811          |       |
|             |            |                       |           | 3.87379           |       |

NA - Indicates that this parameter has hit a bound implied by some inequality constraint and thus has no standard error.

Analysis of Deviance Table

| Model         | Log(likelihood) | # Param's | Deviance | Test d.f. | P-value |
|---------------|-----------------|-----------|----------|-----------|---------|
| Full model    | -5.40673        | 5         |          |           |         |
| Fitted model  | -8.07688        | 1         | 5.34029  | 4         | 0.2541  |
| Reduced model | -20.1904        | 1         | 29.5672  | 4         | <.0001  |
| AIC:          | 18.1538         |           |          |           |         |

Goodness of Fit

| Dose   | Est._Prob. | Expected | Observed | Size  | Scaled Residual |
|--------|------------|----------|----------|-------|-----------------|
| 0.0000 | 0.0000     | 0.000    | 0.000    | 6.000 | 0.000           |
| 0.0500 | 0.1112     | 0.667    | 0.000    | 6.000 | -0.866          |
| 0.2500 | 0.4453     | 2.672    | 1.000    | 6.000 | -1.373          |
| 0.5000 | 0.6923     | 4.154    | 5.000    | 6.000 | 0.748           |
| 1.0000 | 0.9053     | 5.432    | 6.000    | 6.000 | 0.792           |

Chi^2 = 3.82      d.f. = 4      P-value = 0.4303

Benchmark Dose Computation

Specified effect = 0.1  
 Risk Type = Extra risk  
 Confidence level = 0.95  
 BMD = 0.0446954  
 BMDL = 0.026661



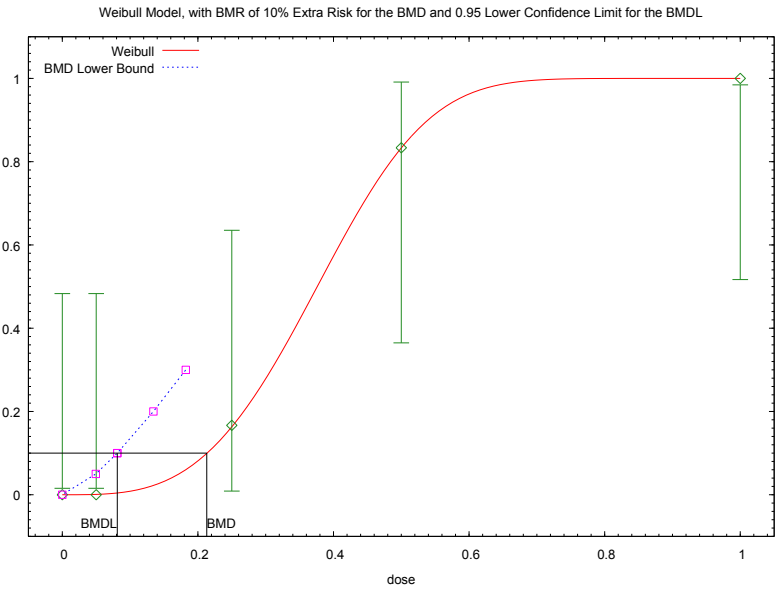

```

=====
      Weibull Model using Weibull Model (Version: 2.16; Date: 2/28/2013)
      Input Data File:
C:/Users/edler/Desktop/BMDS2601_20150629/BMDS2601/Data/wei_Wu2013-3AcDONb_Opt. (d)
      Gnuplot Plotting File:
C:/Users/edler/Desktop/BMDS2601_20150629/BMDS2601/Data/wei_Wu2013-3AcDONb_Opt.plt
      Mon Oct 17 17:47:01 2016
=====
  
```

```

BMDS_Model_Run
~~~~~
  
```

The form of the probability function is:

$$P[\text{response}] = \text{background} + (1-\text{background}) * [1-\text{EXP}(-\text{slope} * \text{dose}^{\text{power}})]$$

Dependent variable = Effect  
 Independent variable = Dose  
 Power parameter is not restricted

Total number of observations = 5  
 Total number of records with missing values = 0  
 Maximum number of iterations = 500  
 Relative Function Convergence has been set to: 1e-008  
 Parameter Convergence has been set to: 1e-008

```

      Default Initial (and Specified) Parameter Values
      Background =      0.125
      Slope =         1.94591
      Power =         1.27059
  
```

```

      Asymptotic Correlation Matrix of Parameter Estimates

      ( *** The model parameter(s) -Background
            have been estimated at a boundary point, or have been specified by
the user,
            and do not appear in the correlation matrix )

      Slope      Power
  
```

Slope                    1                    0.95  
 Power                   0.95                   1

Parameter Estimates

95.0% Wald Confidence

| Interval    | Variable   | Estimate | Std. Err. | Lower Conf. Limit | Upper |
|-------------|------------|----------|-----------|-------------------|-------|
| Conf. Limit | Background | 0        | NA        |                   |       |
| 67.4214     | Slope      | 18.0225  | 25.204    | -31.3764          |       |
| 6.42723     | Power      | 3.32593  | 1.58233   | 0.224626          |       |

NA - Indicates that this parameter has hit a bound implied by some inequality constraint and thus has no standard error.

Analysis of Deviance Table

| Model         | Log(likelihood) | # Param's | Deviance  | Test d.f. | P-value |
|---------------|-----------------|-----------|-----------|-----------|---------|
| Full model    | -5.40673        | 5         |           |           |         |
| Fitted model  | -5.41199        | 2         | 0.0105094 | 3         | 0.9997  |
| Reduced model | -20.1904        | 1         | 29.5672   | 4         | <.0001  |

AIC:                    14.824

Goodness of Fit

| Dose   | Est._Prob. | Expected | Observed | Size  | Scaled Residual |
|--------|------------|----------|----------|-------|-----------------|
| 0.0000 | 0.0000     | 0.000    | 0.000    | 6.000 | 0.000           |
| 0.0500 | 0.0008     | 0.005    | 0.000    | 6.000 | -0.071          |
| 0.2500 | 0.1641     | 0.985    | 1.000    | 6.000 | 0.017           |
| 0.5000 | 0.8342     | 5.005    | 5.000    | 6.000 | -0.006          |
| 1.0000 | 1.0000     | 6.000    | 6.000    | 6.000 | 0.000           |

Chi^2 = 0.01            d.f. = 3            P-value = 0.9999

Benchmark Dose Computation

Specified effect =            0.1  
 Risk Type            =            Extra risk  
 Confidence level =            0.95  
                           BMD =            0.213092  
                           BMDL =           0.0810851

Gamma Model failed

**Supplementary information for WUDON15AC (Wu et al., 2013a)**

Details of the BMD Analysis of concentration-response data for vomiting in mink of Wu et al. (2013) reported in Appendix G, Section G.4.3.3 of the Scientific Opinion on the risks to human and animal health related to the presence of deoxynivalenol and its acetylated and modified forms in food and feed - for 15-Ac-DON

Filename:WuDON15Ac Folder: Mink

Output from BMDS from 19 Oct 2016 with the full information of the fit of all models of BMDS where a model fit was obtained in a reasonable duration of computing time.

The output is ordered in the sequence used in the Table G19 shown in Appendix G which is based on an order of increasing mathematical complexity. The two less complex multistage models are nested under the multistage model which was used with the default assumption of the degree of the polynomial of BMDS.

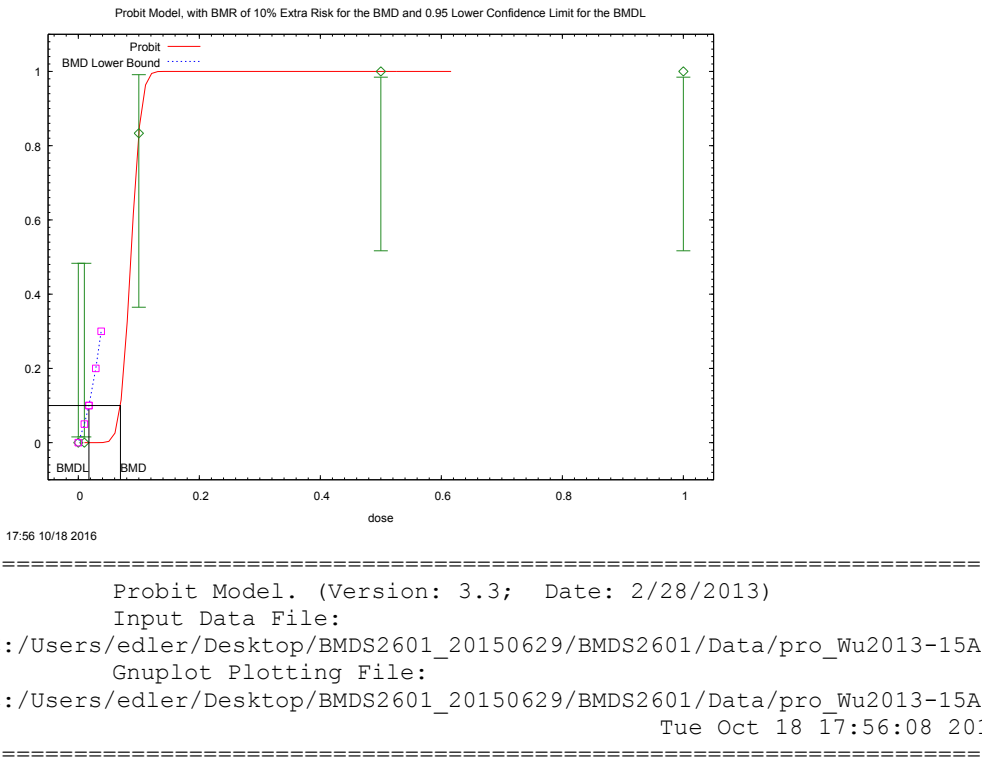

```

BMDS_Model_Run
~~~~~

The form of the probability function is:

P[response] = CumNorm(Intercept+Slope*Dose),

where CumNorm(.) is the cumulative normal distribution function

Dependent variable = Effect
Independent variable = Dose
Slope parameter is not restricted

Total number of observations = 5
Total number of records with missing values = 0
Maximum number of iterations = 500

```

Relative Function Convergence has been set to: 1e-008  
 Parameter Convergence has been set to: 1e-008

Default Initial (and Specified) Parameter Values  
 background = 0 Specified  
 intercept = -0.970097  
 slope = 3.37034

Asymptotic Correlation Matrix of Parameter Estimates

( \*\*\* The model parameter(s) -background  
 have been estimated at a boundary point, or have been specified by  
 the user,  
 and do not appear in the correlation matrix )

|           | intercept | slope |
|-----------|-----------|-------|
| intercept | 1         | -1    |
| slope     | -1        | 1     |

Parameter Estimates

| Interval | Variable  | Estimate | Std. Err. | 95.0% Wald Confidence |       |
|----------|-----------|----------|-----------|-----------------------|-------|
|          |           |          |           | Lower Conf. Limit     | Upper |
| 2468.34  | intercept | -6.4392  | 1262.67   | -2481.22              |       |
| 24821.9  | slope     | 74.0661  | 12626.7   | -24673.8              |       |

Analysis of Deviance Table

| Model         | Log(likelihood) | # Param's | Deviance     | Test d.f. | P-value |
|---------------|-----------------|-----------|--------------|-----------|---------|
| Full model    | -2.70337        | 5         |              |           |         |
| Fitted model  | -2.70337        | 2         | 7.39017e-008 | 3         | 1       |
| Reduced model | -20.527         | 1         | 35.6472      | 4         | <.0001  |
| AIC:          | 9.40673         |           |              |           |         |

Goodness of Fit

| Dose   | Est._Prob. | Expected | Observed | Size  | Scaled Residual |
|--------|------------|----------|----------|-------|-----------------|
| 0.0000 | 0.0000     | 0.000    | 0.000    | 6.000 | -0.000          |
| 0.0100 | 0.0000     | 0.000    | 0.000    | 6.000 | -0.000          |
| 0.1000 | 0.8333     | 5.000    | 5.000    | 6.000 | 0.000           |
| 0.5000 | 1.0000     | 6.000    | 6.000    | 6.000 | 0.000           |
| 1.0000 | 1.0000     | 6.000    | 6.000    | 6.000 | 0.000           |

Chi^2 = 0.00      d.f. = 3      P-value = 1.0000

Benchmark Dose Computation

Specified effect = 0.1  
 Risk Type = Extra risk

Confidence level = 0.95  
 BMD = 0.0696358  
 BMDL = 0.0175236

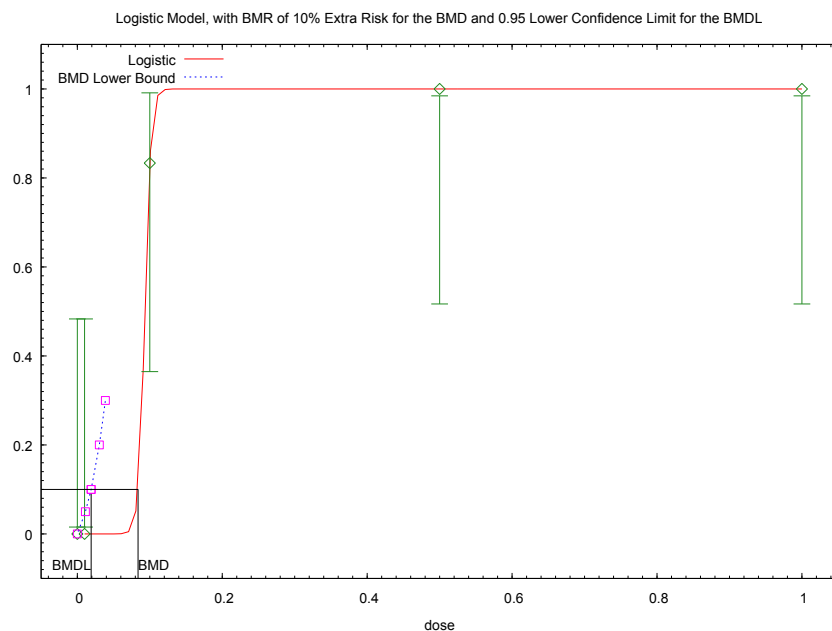

18:00 10/18 2016

```
=====
      Logistic Model. (Version: 2.14; Date: 2/28/2013)
      Input Data File:
C:/Users/edler/Desktop/BMDS2601_20150629/BMDS2601/Data/log_Wu2013-15AcDONb_Opt.(d)
      Gnuplot Plotting File:
C:/Users/edler/Desktop/BMDS2601_20150629/BMDS2601/Data/log_Wu2013-15AcDONb_Opt.plt
      Tue Oct 18 18:00:05 2016
=====
```

BMDS\_Model\_Run

The form of the probability function is:

$$P[\text{response}] = 1/[1+\text{EXP}(-\text{intercept}-\text{slope}*\text{dose})]$$

Dependent variable = Effect  
 Independent variable = Dose  
 Slope parameter is not restricted

Total number of observations = 5  
 Total number of records with missing values = 0  
 Maximum number of iterations = 500  
 Relative Function Convergence has been set to: 1e-008  
 Parameter Convergence has been set to: 1e-008

```
Default Initial Parameter Values
background = 0 Specified
intercept = -1.27414
slope = 4.76396
```

Asymptotic Correlation Matrix of Parameter Estimates

( \*\*\* The model parameter(s) -background  
 have been estimated at a boundary point, or have been specified by  
 the user,  
 and do not appear in the correlation matrix )

|           |           |       |
|-----------|-----------|-------|
|           | intercept | slope |
| intercept | NA        | NA    |
| slope     | NA        | NA    |

NA - This parameter's variance has been estimated as zero or less.  
 THE MODEL HAS PROBABLY NOT CONVERGED!!!

Parameter Estimates

|             |           | 95.0% Wald Confidence |           |                   |       |
|-------------|-----------|-----------------------|-----------|-------------------|-------|
| Interval    | Variable  | Estimate              | Std. Err. | Lower Conf. Limit | Upper |
| Conf. Limit | intercept | -21.8671              | NA        | NA                | NA    |
| NA          | slope     | 234.766               | NA        | NA                | NA    |
| NA          |           |                       |           |                   |       |

At least some variance estimates are negative.  
 THIS USUALLY MEANS THE MODEL HAS NOT CONVERGED!  
 Try again from another starting point.

Analysis of Deviance Table

| Model         | Log(likelihood) | # Param's | Deviance     | Test d.f. | P-value |
|---------------|-----------------|-----------|--------------|-----------|---------|
| Full model    | -2.70337        | 5         |              |           |         |
| Fitted model  | -2.70337        | 2         | 4.47561e-008 | 3         | 1       |
| Reduced model | -20.527         | 1         | 35.6472      | 4         | <.0001  |
| AIC:          | 9.40673         |           |              |           |         |

Goodness of Fit

| Dose   | Est._Prob. | Expected | Observed | Size  | Scaled Residual |
|--------|------------|----------|----------|-------|-----------------|
| 0.0000 | 0.0000     | 0.000    | 0.000    | 6.000 | -0.000          |
| 0.0100 | 0.0000     | 0.000    | 0.000    | 6.000 | -0.000          |
| 0.1000 | 0.8333     | 5.000    | 5.000    | 6.000 | -0.000          |
| 0.5000 | 1.0000     | 6.000    | 6.000    | 6.000 | 0.000           |
| 1.0000 | 1.0000     | 6.000    | 6.000    | 6.000 | 0.000           |

Chi^2 = 0.00      d.f. = 3      P-value = 1.0000

Benchmark Dose Computation

Specified effect = 0.1  
 Risk Type = Extra risk  
 Confidence level = 0.95  
 BMD = 0.0837851  
 BMDL = 0.0190577

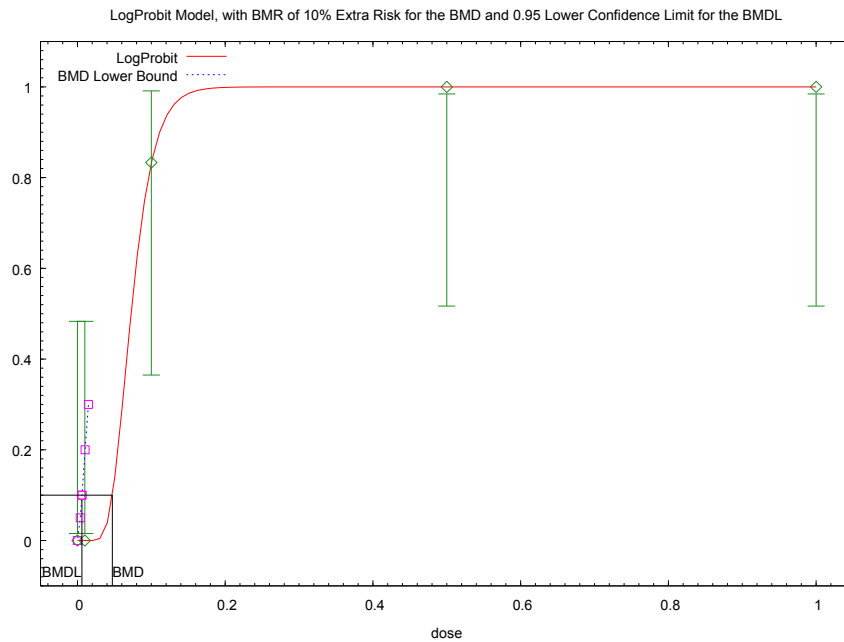

18:01 10/18 2016

```

=====
      Probit Model. (Version: 3.3; Date: 2/28/2013)
      Input Data File:
C:/Users/edler/Desktop/BMDS2601_20150629/BMDS2601/Data/lnp_Wu2013-15AcDONb_Opt. (d)
      Gnuplot Plotting File:
C:/Users/edler/Desktop/BMDS2601_20150629/BMDS2601/Data/lnp_Wu2013-15AcDONb_Opt.plt
                                          Tue Oct 18 18:01:37 2016
=====

```

BMDS\_Model\_Run

The form of the probability function is:

$$P[\text{response}] = \text{Background} + (1 - \text{Background}) * \text{CumNorm}(\text{Intercept} + \text{Slope} * \text{Log}(\text{Dose})),$$

where CumNorm(.) is the cumulative normal distribution function

Dependent variable = Effect  
 Independent variable = Dose  
 Slope parameter is not restricted

Total number of observations = 5  
 Total number of records with missing values = 0  
 Maximum number of iterations = 500  
 Relative Function Convergence has been set to: 1e-008  
 Parameter Convergence has been set to: 1e-008

User has chosen the log transformed model

```

Default Initial (and Specified) Parameter Values
background = 0
intercept = 1.83904
slope = 0.647754

```

Asymptotic Correlation Matrix of Parameter Estimates

( \*\*\* The model parameter(s) -background have been estimated at a boundary point, or have been specified by the user, and do not appear in the correlation matrix )

|           | intercept | slope |
|-----------|-----------|-------|
| intercept | 1         | 1     |
| slope     | 1         | 1     |

Parameter Estimates

|             |            | 95.0% Wald Confidence |           |                   |       |
|-------------|------------|-----------------------|-----------|-------------------|-------|
| Interval    | Variable   | Estimate              | Std. Err. | Lower Conf. Limit | Upper |
| Conf. Limit | background | 0                     | NA        |                   |       |
| 3229.89     | intercept  | 7.87447               | 1643.91   | -3214.14          |       |
| 1402.3      | slope      | 2.9997                | 713.943   | -1396.3           |       |

NA - Indicates that this parameter has hit a bound implied by some inequality constraint and thus has no standard error.

Analysis of Deviance Table

| Model         | Log(likelihood) | # Param's | Deviance     | Test d.f. | P-value |
|---------------|-----------------|-----------|--------------|-----------|---------|
| Full model    | -2.70337        | 5         |              |           |         |
| Fitted model  | -2.70337        | 2         | 5.81484e-008 | 3         | 1       |
| Reduced model | -20.527         | 1         | 35.6472      | 4         | <.0001  |
| AIC:          | 9.40673         |           |              |           |         |

Goodness of Fit

| Dose   | Est._Prob. | Expected | Observed | Size  | Scaled Residual |
|--------|------------|----------|----------|-------|-----------------|
| 0.0000 | 0.0000     | 0.000    | 0.000    | 6.000 | 0.000           |
| 0.0100 | 0.0000     | 0.000    | 0.000    | 6.000 | -0.000          |
| 0.1000 | 0.8333     | 5.000    | 5.000    | 6.000 | 0.000           |
| 0.5000 | 1.0000     | 6.000    | 6.000    | 6.000 | 0.000           |
| 1.0000 | 1.0000     | 6.000    | 6.000    | 6.000 | 0.000           |

Chi^2 = 0.00      d.f. = 3      P-value = 1.0000

Benchmark Dose Computation

Specified effect = 0.1  
 Risk Type = Extra risk  
 Confidence level = 0.95  
 BMD = 0.0472493  
 BMDL = 0.00603745



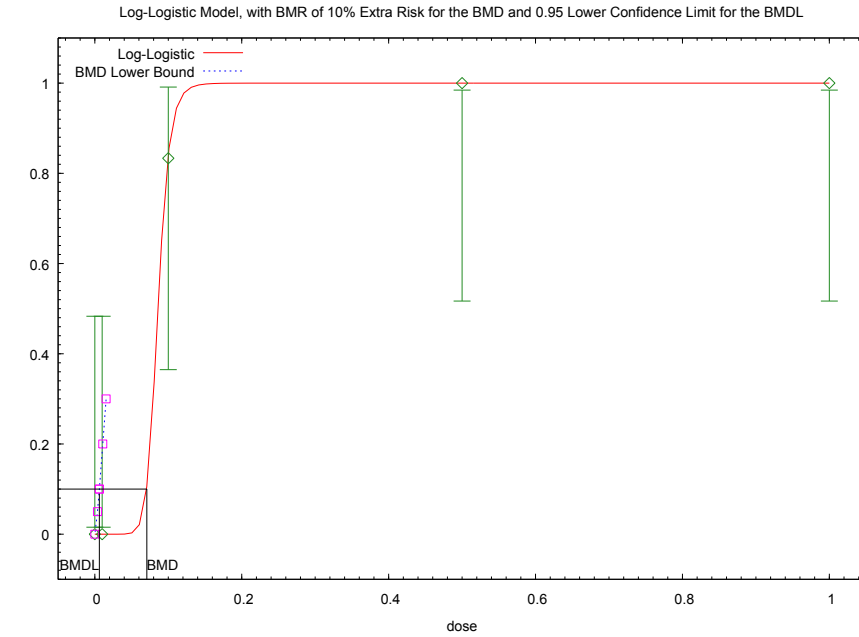

```

=====
      Logistic Model. (Version: 2.14; Date: 2/28/2013)
      Input Data File:
C:/Users/edler/Desktop/BMDS2601_20150629/BMDS2601/Data/lnl_Wu2013-15AcDONb_Opt. (d)
      Gnuplot Plotting File:
C:/Users/edler/Desktop/BMDS2601_20150629/BMDS2601/Data/lnl_Wu2013-15AcDONb_Opt.plt
                                          Tue Oct 18 18:03:16 2016
=====
    
```

```

BMDS_Model_Run
~~~~~
    
```

The form of the probability function is:

$$P[\text{response}] = \text{background} + (1 - \text{background}) / [1 + \text{EXP}(-\text{intercept} - \text{slope} * \text{Log}(\text{dose}))]$$

Dependent variable = Effect  
 Independent variable = Dose  
 Slope parameter is not restricted

Total number of observations = 5  
 Total number of records with missing values = 0  
 Maximum number of iterations = 500  
 Relative Function Convergence has been set to: 1e-008  
 Parameter Convergence has been set to: 1e-008

User has chosen the log transformed model

```

      Default Initial Parameter Values
      background =          0
      intercept  =      3.20342
      slope      =      1.13661
    
```

Asymptotic Correlation Matrix of Parameter Estimates

( \*\*\* The model parameter(s) -background

the user, have been estimated at a boundary point, or have been specified by  
and do not appear in the correlation matrix )

|           | intercept | slope |
|-----------|-----------|-------|
| intercept | 1         | 1     |
| slope     | 1         | 1     |

Parameter Estimates

|             |            | 95.0% Wald Confidence |           |                   |       |
|-------------|------------|-----------------------|-----------|-------------------|-------|
| Interval    | Variable   | Estimate              | Std. Err. | Lower Conf. Limit | Upper |
| Conf. Limit | background | 0                     | NA        |                   |       |
| 16555.5     | intercept  | 27.0242               | 8433.06   | -16501.5          |       |
| 7189.27     | slope      | 11.0375               | 3662.43   | -7167.2           |       |

NA - Indicates that this parameter has hit a bound implied by some inequality constraint and thus has no standard error.

Analysis of Deviance Table

| Model         | Log(likelihood) | # Param's | Deviance     | Test d.f. | P-value |
|---------------|-----------------|-----------|--------------|-----------|---------|
| Full model    | -2.70337        | 5         |              |           |         |
| Fitted model  | -2.70337        | 2         | 4.80546e-008 | 3         | 1       |
| Reduced model | -20.527         | 1         | 35.6472      | 4         | <.0001  |
| AIC:          | 9.40673         |           |              |           |         |

Goodness of Fit

| Dose   | Est._Prob. | Expected | Observed | Size  | Scaled Residual |
|--------|------------|----------|----------|-------|-----------------|
| 0.0000 | 0.0000     | 0.000    | 0.000    | 6.000 | 0.000           |
| 0.0100 | 0.0000     | 0.000    | 0.000    | 6.000 | -0.000          |
| 0.1000 | 0.8333     | 5.000    | 5.000    | 6.000 | 0.000           |
| 0.5000 | 1.0000     | 6.000    | 6.000    | 6.000 | 0.000           |
| 1.0000 | 1.0000     | 6.000    | 6.000    | 6.000 | 0.000           |

Chi^2 = 0.00      d.f. = 3      P-value = 1.0000

Benchmark Dose Computation

Specified effect = 0.1  
 Risk Type = Extra risk  
 Confidence level = 0.95  
 BMD = 0.0708305  
 BMDL = 0.00614071

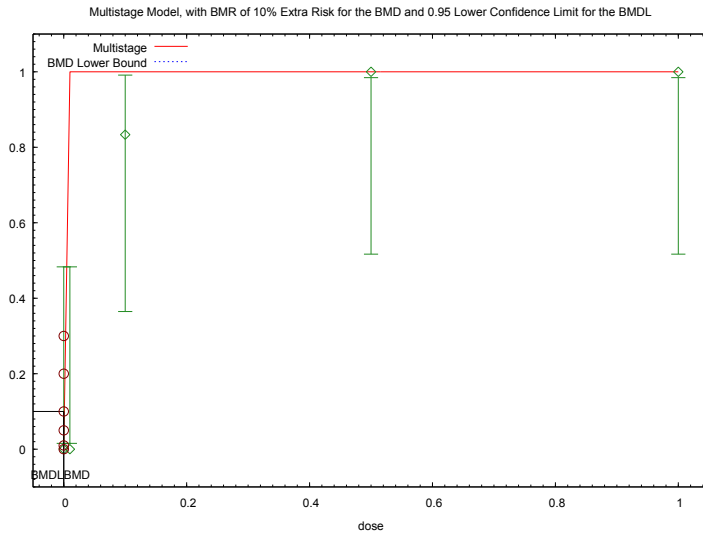

18:04 10/18 2016

```

=====
Multistage Model. (Version: 3.4; Date: 05/02/2014)
Input Data File:
C:/Users/edler/Desktop/BMDS2601_20150629/BMDS2601/Data/mst_Wu2013-15AcDONb_Opt.(d)
Gnuplot Plotting File:
C:/Users/edler/Desktop/BMDS2601_20150629/BMDS2601/Data/mst_Wu2013-15AcDONb_Opt.plt
Tue Oct 18 18:04:46 2016
=====

```

BMDS\_Model\_Run

The form of the probability function is:

$$P[\text{response}] = \text{background} + (1-\text{background}) * [1 - \text{EXP}(-\text{beta1} * \text{dose}^1 - \text{beta2} * \text{dose}^2)]$$

The parameter betas are not restricted

Dependent variable = Effect  
Independent variable = Dose

Total number of observations = 5  
Total number of records with missing values = 0  
Total number of parameters in model = 3  
Total number of specified parameters = 0  
Degree of polynomial = 2

Maximum number of iterations = 500  
Relative Function Convergence has been set to: 1e-008  
Parameter Convergence has been set to: 1e-008

Default Initial Parameter Values

Background = 0  
Beta(1) = 2.9711e+020  
Beta(2) = -1.87103e+020

Asymptotic Correlation Matrix of Parameter Estimates

( \*\*\* The model parameter(s) -Background have been estimated at a boundary point, or have been specified by the user,

and do not appear in the correlation matrix )

|         | Beta(1) | Beta(2) |
|---------|---------|---------|
| Beta(1) | 1       | 0       |
| Beta(2) | 0       | 1       |

Parameter Estimates

|              |            | 95.0% Wald Confidence |           |                   |       |
|--------------|------------|-----------------------|-----------|-------------------|-------|
| Interval     | Variable   | Estimate              | Std. Err. | Lower Conf. Limit | Upper |
| Conf. Limit  | Background | 0                     | NA        |                   |       |
|              | Beta(1)    | 2.97202e+020          | 1         | 2.97202e+020      |       |
| 2.97202e+020 | Beta(2)    | -1.87119e+020         | 1         | -1.87119e+020     | -     |
| 1.87119e+020 |            |                       |           |                   |       |

NA - Indicates that this parameter has hit a bound implied by some inequality constraint and thus has no standard error.

Analysis of Deviance Table

| Model         | Log(likelihood) | # Param's | Deviance | Test d.f. | P-value |
|---------------|-----------------|-----------|----------|-----------|---------|
| Full model    | -2.70337        | 5         |          |           |         |
| Fitted model  | -4970           | 2         | 9934.59  | 3         | 0       |
| Reduced model | -20.527         | 1         | 35.6472  | 4         | <.0001  |
| AIC:          | 9944            |           |          |           |         |

Goodness of Fit

| Dose   | Est._Prob. | Expected | Observed | Size  | Scaled Residual |
|--------|------------|----------|----------|-------|-----------------|
| 0.0000 | 0.0000     | 0.000    | 0.000    | 6.000 | -0.003          |
| 0.0100 | 1.0000     | 6.000    | 0.000    | 6.000 | -6.000          |
| 0.1000 | 1.0000     | 6.000    | 5.000    | 6.000 | -1.000          |
| 0.5000 | 1.0000     | 6.000    | 6.000    | 6.000 | 0.000           |
| 1.0000 | 1.0000     | 6.000    | 6.000    | 6.000 | 0.000           |

Chi^2 = 37.00      d.f. = 3      P-value = 0.0000

Benchmark Dose Computation

Specified effect = 0.1  
 Risk Type = Extra risk  
 Confidence level = 0.95  
 BMD = 3.54508e-022  
 BMDL = 3.54508e-022  
 BMDU = 3.54508e-022

Taken together, (3.54508e-022, 3.54508e-022) is a 90 % two-sided confidence interval for the BMD

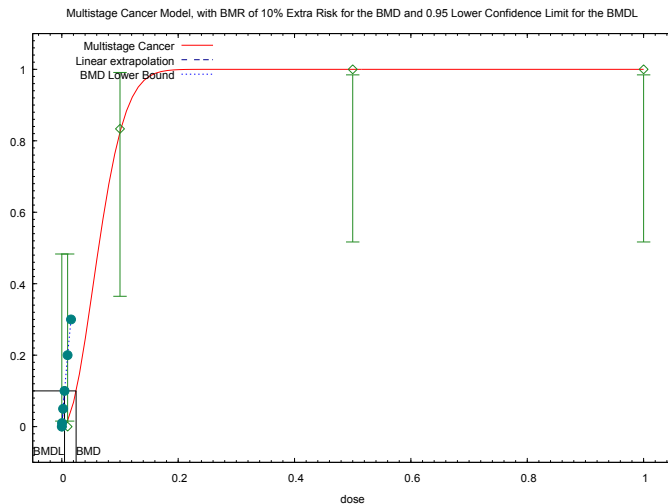

18:05 10/18 2016

```

=====
Multistage Model. (Version: 3.4; Date: 05/02/2014)
Input Data File:
C:/Users/edler/Desktop/BMDS2601_20150629/BMDS2601/Data/msc_Wu2013-15AcDONb_Opt. (d)
Gnuplot Plotting File:
C:/Users/edler/Desktop/BMDS2601_20150629/BMDS2601/Data/msc_Wu2013-15AcDONb_Opt.plt
Tue Oct 18 18:05:55 2016
=====
    
```

BMDS\_Model\_Run

The form of the probability function is:

$$P[\text{response}] = \text{background} + (1-\text{background}) * [1-\text{EXP}(-\text{beta1} * \text{dose}^1 - \text{beta2} * \text{dose}^2)]$$

The parameter betas are restricted to be positive

Dependent variable = Effect  
Independent variable = Dose

Total number of observations = 5  
Total number of records with missing values = 0  
Total number of parameters in model = 3  
Total number of specified parameters = 0  
Degree of polynomial = 2

Maximum number of iterations = 500  
Relative Function Convergence has been set to: 1e-008  
Parameter Convergence has been set to: 1e-008

Default Initial Parameter Values

Background = 1  
Beta(1) = 1.15414e+020  
Beta(2) = 0

Asymptotic Correlation Matrix of Parameter Estimates

( \*\*\* The model parameter(s) -Background -Beta(1) have been estimated at a boundary point, or have been specified by the user, and do not appear in the correlation matrix )

Beta(2)  
Beta(2) 1

Parameter Estimates

95.0% Wald Confidence

| Interval | Variable   | Estimate | Std. Err. | Lower Conf. Limit | Upper Conf. Limit |
|----------|------------|----------|-----------|-------------------|-------------------|
|          | Background | 0        | NA        |                   |                   |
|          | Beta(1)    | 0        | NA        |                   |                   |
|          | Beta(2)    | 174.344  | 88.2257   | 1.42469           | 347.263           |

NA - Indicates that this parameter has hit a bound implied by some inequality constraint and thus has no standard error.

Analysis of Deviance Table

| Model         | Log(likelihood) | # Param's | Deviance | Test d.f. | P-value |
|---------------|-----------------|-----------|----------|-----------|---------|
| Full model    | -2.70337        | 5         |          |           |         |
| Fitted model  | -2.80941        | 1         | 0.212079 | 4         | 0.9948  |
| Reduced model | -20.527         | 1         | 35.6472  | 4         | <.0001  |
| AIC:          | 7.61881         |           |          |           |         |

Goodness of Fit

| Dose   | Est._Prob. | Expected | Observed | Size  | Scaled Residual |
|--------|------------|----------|----------|-------|-----------------|
| 0.0000 | 0.0000     | 0.000    | 0.000    | 6.000 | 0.000           |
| 0.0100 | 0.0173     | 0.104    | 0.000    | 6.000 | -0.325          |
| 0.1000 | 0.8251     | 4.950    | 5.000    | 6.000 | 0.053           |
| 0.5000 | 1.0000     | 6.000    | 6.000    | 6.000 | 0.000           |
| 1.0000 | 1.0000     | 6.000    | 6.000    | 6.000 | 0.000           |

Chi^2 = 0.11      d.f. = 4      P-value = 0.9986

Benchmark Dose Computation

Specified effect = 0.1  
 Risk Type = Extra risk  
 Confidence level = 0.95  
 BMD = 0.024583  
 BMDL = 0.004672  
 BMDU = 0.0387137

Taken together, (0.004672, 0.0387137) is a 90 % two-sided confidence interval for the BMD

Cancer Slope Factor = 21.4041

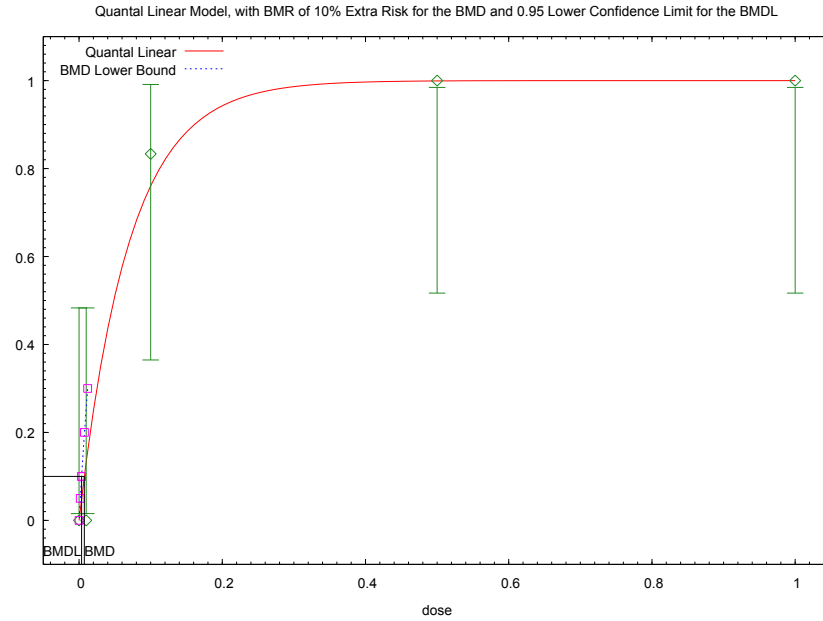

18:07 10/18 2016

```
=====
Quantal Linear Model using Weibull Model (Version: 2.16; Date: 2/28/2013)
Input Data File:
C:/Users/edler/Desktop/BMDS2601_20150629/BMDS2601/Data/qln_Wu2013-15AcDONb_Opt. (d)
Gnuplot Plotting File:
C:/Users/edler/Desktop/BMDS2601_20150629/BMDS2601/Data/qln_Wu2013-15AcDONb_Opt.plt
Tue Oct 18 18:07:27 2016
=====
```

BMDS\_Model\_Run

The form of the probability function is:

$$P[\text{response}] = \text{background} + (1-\text{background}) * [1-\text{EXP}(-\text{slope} * \text{dose})]$$

Dependent variable = Effect  
Independent variable = Dose

Total number of observations = 5  
Total number of records with missing values = 0  
Maximum number of iterations = 500  
Relative Function Convergence has been set to: 1e-008  
Parameter Convergence has been set to: 1e-008

```
Default Initial (and Specified) Parameter Values
Background = 0.125
Slope = 1.94591
Power = 1 Specified
```

Asymptotic Correlation Matrix of Parameter Estimates

```
( *** The model parameter(s) -Background -Power
have been estimated at a boundary point, or have been specified by
the user,
and do not appear in the correlation matrix )

Slope
Slope 1
```

## Parameter Estimates

|             |            | 95.0% Wald Confidence |           |                   |       |
|-------------|------------|-----------------------|-----------|-------------------|-------|
| Interval    | Variable   | Estimate              | Std. Err. | Lower Conf. Limit | Upper |
| Conf. Limit | Background | 0                     | NA        |                   |       |
| 27.5215     | Slope      | 14.2843               | 6.7538    | 1.04714           |       |

NA - Indicates that this parameter has hit a bound implied by some inequality constraint and thus has no standard error.

## Analysis of Deviance Table

| Model         | Log(likelihood) | # Param's | Deviance | Test d.f. | P-value |
|---------------|-----------------|-----------|----------|-----------|---------|
| Full model    | -2.70337        | 5         |          |           |         |
| Fitted model  | -3.66035        | 1         | 1.91397  | 4         | 0.7516  |
| Reduced model | -20.527         | 1         | 35.6472  | 4         | <.0001  |

AIC: 9.3207

## Goodness of Fit

| Dose   | Est._Prob. | Expected | Observed | Size  | Scaled Residual |
|--------|------------|----------|----------|-------|-----------------|
| 0.0000 | 0.0000     | 0.000    | 0.000    | 6.000 | 0.000           |
| 0.0100 | 0.1331     | 0.799    | 0.000    | 6.000 | -0.960          |
| 0.1000 | 0.7603     | 4.562    | 5.000    | 6.000 | 0.419           |
| 0.5000 | 0.9992     | 5.995    | 6.000    | 6.000 | 0.069           |
| 1.0000 | 1.0000     | 6.000    | 6.000    | 6.000 | 0.002           |

Chi<sup>2</sup> = 1.10      d.f. = 4      P-value = 0.8940

## Benchmark Dose Computation

Specified effect = 0.1  
 Risk Type = Extra risk  
 Confidence level = 0.95  
 BMD = 0.00737595  
 BMDL = 0.00354948



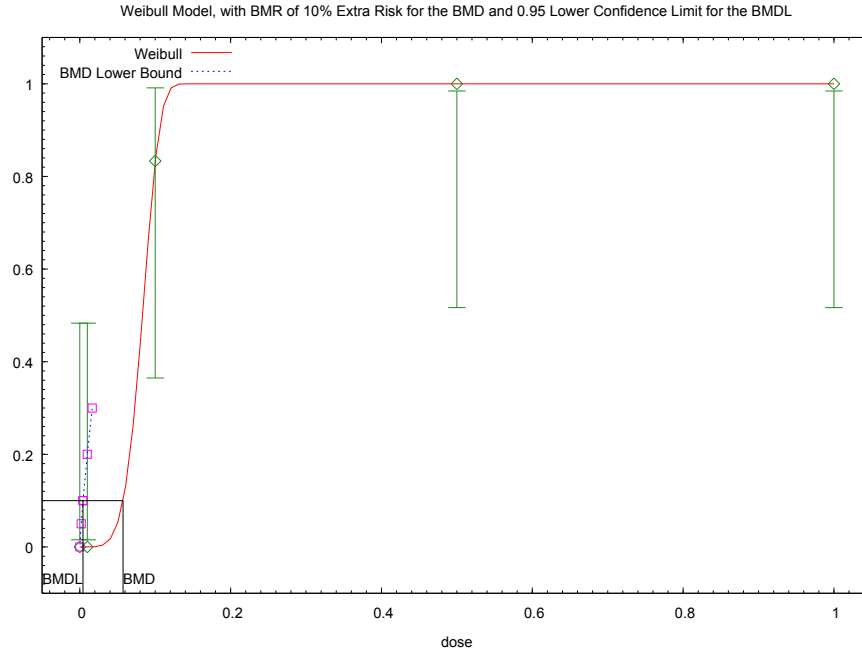

18:09 10/18 2016

```

=====
      Weibull Model using Weibull Model (Version: 2.16; Date: 2/28/2013)
      Input Data File:
C:/Users/edler/Desktop/BMDS2601_20150629/BMDS2601/Data/wei_Wu2013-15AcDONb_Opt. (d)
      Gnuplot Plotting File:
C:/Users/edler/Desktop/BMDS2601_20150629/BMDS2601/Data/wei_Wu2013-15AcDONb_Opt.plt
      Tue Oct 18 18:09:12 2016
=====
    
```

BMDS\_Model\_Run

The form of the probability function is:

$$P[\text{response}] = \text{background} + (1-\text{background}) * [1-\text{EXP}(-\text{slope} * \text{dose}^{\text{power}})]$$

Dependent variable = Effect  
 Independent variable = Dose  
 Power parameter is not restricted

Total number of observations = 5  
 Total number of records with missing values = 0  
 Maximum number of iterations = 500  
 Relative Function Convergence has been set to: 1e-008  
 Parameter Convergence has been set to: 1e-008

Default Initial (and Specified) Parameter Values

|              |          |
|--------------|----------|
| Background = | 0.125    |
| Slope =      | 1.94591  |
| Power =      | 0.453362 |

Asymptotic Correlation Matrix of Parameter Estimates

( \*\*\* The model parameter(s) -Background  
 have been estimated at a boundary point, or have been specified by  
 the user,

and do not appear in the correlation matrix )

|       | Slope | Power |
|-------|-------|-------|
| Slope | 1     | 1     |
| Power | 1     | 1     |

Parameter Estimates

|              |            | 95.0% Wald Confidence |              |                   |       |
|--------------|------------|-----------------------|--------------|-------------------|-------|
| Interval     | Variable   | Estimate              | Std. Err.    | Lower Conf. Limit | Upper |
| Conf. Limit  | Background | 0                     | NA           |                   |       |
|              | Slope      | 224220                | 1.69921e+007 | -3.30798e+007     |       |
| 3.35282e+007 | Power      | 5.09741               | 32.9116      | -59.4081          |       |
| 69.6029      |            |                       |              |                   |       |

NA - Indicates that this parameter has hit a bound implied by some inequality constraint and thus has no standard error.

Analysis of Deviance Table

| Model         | Log(likelihood) | # Param's | Deviance   | Test d.f. | P-value |
|---------------|-----------------|-----------|------------|-----------|---------|
| Full model    | -2.70337        | 5         |            |           |         |
| Fitted model  | -2.70345        | 2         | 0.00017181 | 3         | 1       |
| Reduced model | -20.527         | 1         | 35.6472    | 4         | <.0001  |
| AIC:          | 9.40691         |           |            |           |         |

Goodness of Fit

| Dose   | Est._Prob. | Expected | Observed | Size  | Scaled Residual |
|--------|------------|----------|----------|-------|-----------------|
| 0.0000 | 0.0000     | 0.000    | 0.000    | 6.000 | 0.000           |
| 0.0100 | 0.0000     | 0.000    | 0.000    | 6.000 | -0.009          |
| 0.1000 | 0.8333     | 5.000    | 5.000    | 6.000 | 0.000           |
| 0.5000 | 1.0000     | 6.000    | 6.000    | 6.000 | 0.000           |
| 1.0000 | 1.0000     | 6.000    | 6.000    | 6.000 | 0.000           |

Chi^2 = 0.00      d.f. = 3      P-value = 1.0000

Benchmark Dose Computation

Specified effect = 0.1  
 Risk Type = Extra risk  
 Confidence level = 0.95  
 BMD = 0.0573571  
 BMDL = 0.00424741

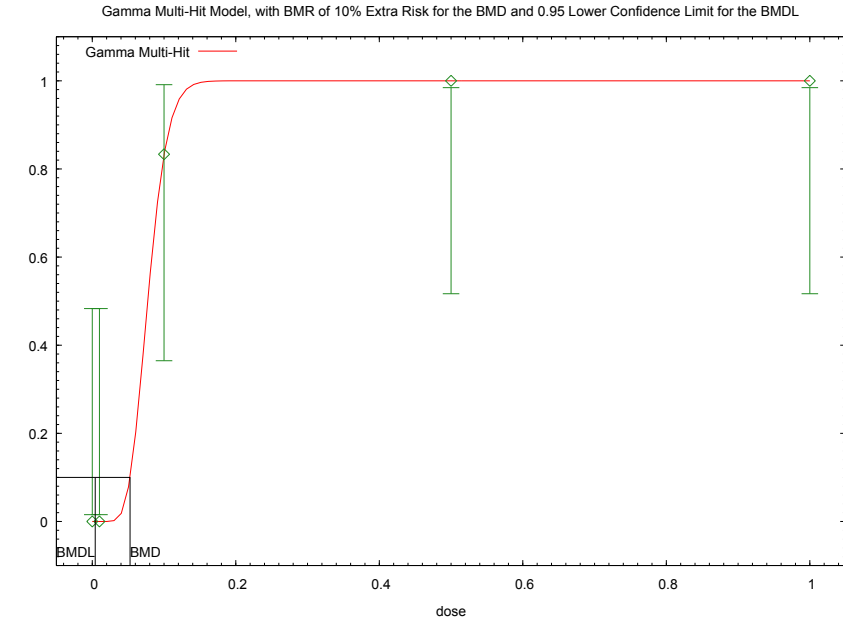

```

=====
      Gamma Model. (Version: 2.16; Date: 2/28/2013)
      Input Data File:
C:/Users/edler/Desktop/BMDS2601_20150629/BMDS2601/Data/gam_Wu2013-15AcDONb_Opt. (d)
      Gnuplot Plotting File:
C:/Users/edler/Desktop/BMDS2601_20150629/BMDS2601/Data/gam_Wu2013-15AcDONb_Opt.plt
                                          Tue Oct 18 18:11:14 2016
=====
  
```

```

BMDS_Model_Run
~~~~~
  
```

The form of the probability function is:

$P[\text{response}] = \text{background} + (1 - \text{background}) * \text{CumGamma}[\text{slope} * \text{dose}, \text{power}]$ ,  
 where CumGamma(.) is the cumulative Gamma distribution function

Dependent variable = Effect  
 Independent variable = Dose  
 Power parameter is not restricted

Total number of observations = 5  
 Total number of records with missing values = 0  
 Maximum number of iterations = 500  
 Relative Function Convergence has been set to: 1e-008  
 Parameter Convergence has been set to: 1e-008

```

      Default Initial (and Specified) Parameter Values
      Background =      0.125
      Slope =          12.8562
      Power =           1.3
  
```

Asymptotic Correlation Matrix of Parameter Estimates

( \*\*\* The model parameter(s) -Background  
 have been estimated at a boundary point, or have been specified by  
 the user, and do not appear in the correlation matrix )

|       | Slope | Power |
|-------|-------|-------|
| Slope | 1     | 1     |
| Power | 1     | 1     |

Parameter Estimates

|          |            | 95.0% Wald Confidence |           |                   |                   |
|----------|------------|-----------------------|-----------|-------------------|-------------------|
| Interval | Variable   | Estimate              | Std. Err. | Lower Conf. Limit | Upper Conf. Limit |
|          | Background | 0                     | NA        |                   |                   |
|          | Slope      | 164.278               | 19326.5   | -37715            | 38043.5           |
|          | Power      | 13.0048               | 1701.5    | -3321.87          | 3347.88           |

NA - Indicates that this parameter has hit a bound implied by some inequality constraint and thus has no standard error.

Analysis of Deviance Table

| Model         | Log(likelihood) | # Param's | Deviance     | Test d.f. | P-value |
|---------------|-----------------|-----------|--------------|-----------|---------|
| Full model    | -2.70337        | 5         |              |           |         |
| Fitted model  | -2.70337        | 2         | 2.79202e-007 | 3         | 1       |
| Reduced model | -20.527         | 1         | 35.6472      | 4         | <.0001  |

AIC: 9.40673

Goodness of Fit

| Dose   | Est._Prob. | Expected | Observed | Size  | Scaled Residual |
|--------|------------|----------|----------|-------|-----------------|
| 0.0000 | 0.0000     | 0.000    | 0.000    | 6.000 | 0.000           |
| 0.0100 | 0.0000     | 0.000    | 0.000    | 6.000 | -0.000          |
| 0.1000 | 0.8334     | 5.000    | 5.000    | 6.000 | -0.000          |
| 0.5000 | 1.0000     | 6.000    | 6.000    | 6.000 | 0.000           |
| 1.0000 | 1.0000     | 6.000    | 6.000    | 6.000 | 0.000           |

Chi^2 = 0.00      d.f. = 3      P-value = 1.0000

Benchmark Dose Computation

Specified effect = 0.1  
 Risk Type = Extra risk  
 Confidence level = 0.95  
 BMD = 0.0526537  
 BMDL = 0.00408511
